# Supplementary material for: Investigation of the free radical scavenging ability of l-tryptophan and its derivatives using experimental methods and quantum chemical calculations
Source: Royal Society of Chemistry journal article supplement (doi:10.1039/d4ra06729k), 2024-01-01
Supplement: d4ra06729k1.pdf [file d4ra06729k1.pdf]

## Supplementary Data File

### Investigation of free radical scavenging ability of L-Tryptophan and its derivatives using experimental methods and quantum chemical calculations

Dinh Quy Huong<sup>1\*</sup>, Pham Dinh Tu Tai<sup>2</sup>, Nguyen Quang Trung<sup>3,4</sup>, Nguyen Minh Thong<sup>4</sup>,  
Nguyen Minh Tam<sup>5</sup>, Nguyen Hai Phong<sup>6</sup>, Pham Cam Nam<sup>7</sup>

<sup>1</sup>Department of Chemistry, University of Education, Hue University, Hue, Vietnam.

<sup>2</sup>Department of Planning, Finance and Facilities Management, Hue University, Hue, Vietnam.

<sup>3</sup>Quality Assurance and Testing Center 2, Danang, Vietnam.

<sup>4</sup>The University of Danang-University of Science and Education, Da Nang, Vietnam.

<sup>5</sup>Faculty of Basic Sciences, University of Phan Thiet, Phan Thiet, Vietnam.

<sup>6</sup>Department of Chemistry, University of Science, Hue University, Hue, Vietnam.

<sup>7</sup>Department of Chemical Engineering, The University of Danang – University of Science and Technology, Danang, Vietnam.

\*: Corresponding author: dqhuong@hueuni.edu.vn

#### List of supporting information

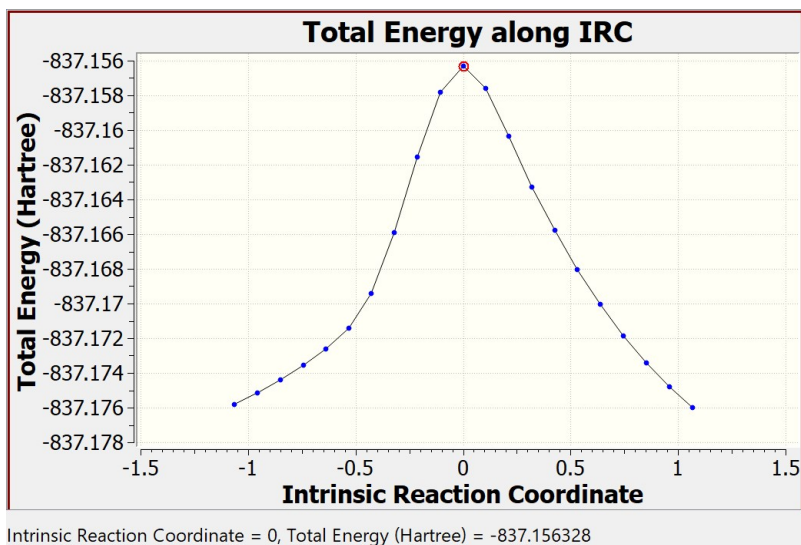

(a) N3-H20 (LP)

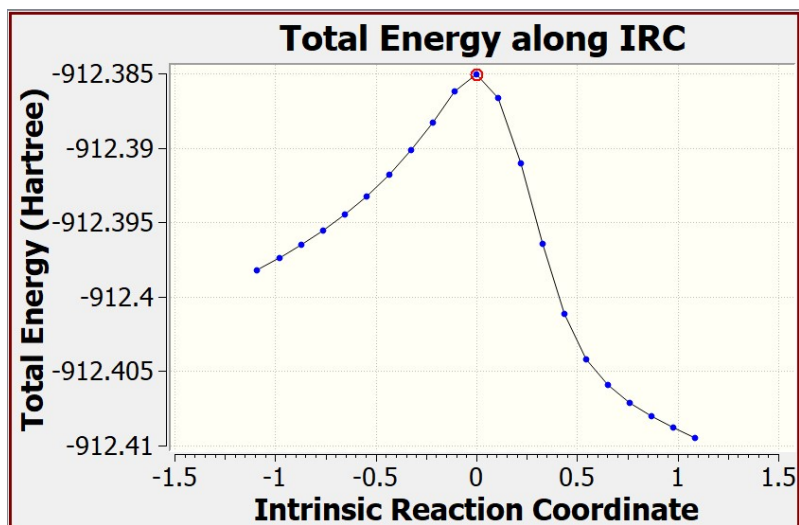

Intrinsic Reaction Coordinate = 0, Total Energy (Hartree) = -912.385092

(b) O1-H27 (HLP)

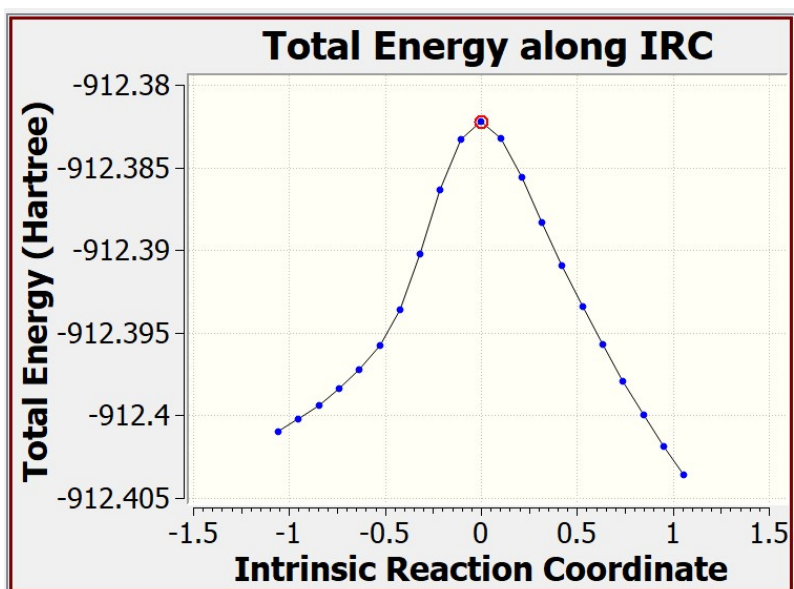

Intrinsic Reaction Coordinate = 0, Total Energy (Hartree) = -912.38223

(c) N4-H21 (HLP)

**Fig. S1.** Intrinsic Reaction Coordinate of reactions between LP, HLP and HOO<sup>•</sup> in the gas phase

**Table S1.** Detailed instructions on calculating the thermodynamic parameters for the HAT, SET-PT, SPLET mechanisms.

In the hydrogen atom transfer (HAT) mechanism, the transfer of hydrogen from the antioxidant molecule to the free radical is crucial, and this process is determined by the bond dissociation enthalpy (BDE) [20].

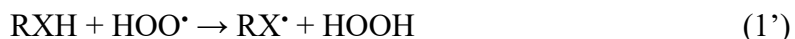

The BDE of RXH is calculated as follows:

$$\text{BDE}(\text{RXH}) = H(\text{H}\cdot) + H(\text{RX}\cdot) - H(\text{RXH}) \quad (2')$$

In the case of the sequential electron transfer proton transfer (SET-PT) mechanism, two steps are involved [21]:

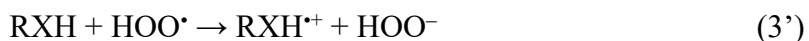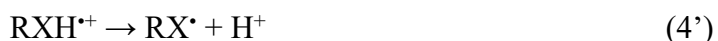

These steps correspond to the thermodynamic parameters ionization potential (IP) and proton dissociation enthalpy (PDE), calculated as [22]:

$$\text{IP} = H(\text{RXH}^{\bullet+}) + H(\text{e}^-) - H(\text{RXH}) \quad (5')$$

$$\text{PDE} = H(\text{RX}\cdot) + H(\text{H}^+) - H(\text{RXH}^{\bullet+}) \quad (6')$$

For the sequential proton-loss electron transfer (SPLET) mechanism [23]:

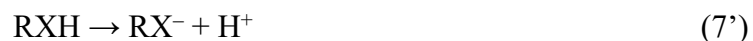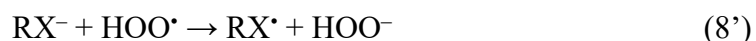

Proton affinity (PA) and electron transfer enthalpy (ETE) are two critical parameters for SPLET [24], calculated as:

$$\text{PA} = H(\text{RX}^-) + H(\text{H}^+) - H(\text{RXH}) \quad (9')$$

$$\text{ETE} = H(\text{RX}\cdot) + H(\text{e}^-) - H(\text{RX}^-) \quad (10')$$

Where RXH represents LP and HLP, and X replaces O and N. The enthalpies of each species at 298 K were denoted by  $H$ . The enthalpies of the electron and proton in the gas phase and water were obtained from literature references [25].

**Table S2.** Optimized structures of LP forms in gas phase using M06-2X/6-311++g(d,p)

|     | Stable Neutral form (1) - Gas |             | C <sub>11</sub> H <sub>12</sub> N <sub>2</sub> O <sub>2</sub> - Gas |
|-----|-------------------------------|-------------|---------------------------------------------------------------------|
| 0 1 |                               |             |                                                                     |
| O   | 1.23600200                    | -0.80056700 | 1.73337200                                                          |
| O   | 2.13277900                    | -1.92852300 | 0.02257700                                                          |
| N   | -1.76837400                   | 2.05075200  | 0.43691300                                                          |
| N   | 3.80251600                    | 0.36500800  | -0.46293700                                                         |
| C   | 0.09046900                    | 1.16311400  | -0.46650600                                                         |
| C   | 1.49944400                    | 0.99885300  | -0.94468900                                                         |
| C   | -0.93687700                   | 0.15264100  | -0.42745300                                                         |
| C   | 2.47443600                    | 0.45408900  | 0.12073100                                                          |
| C   | -2.08405300                   | 0.74432600  | 0.14718500                                                          |
| C   | -0.46337600                   | 2.29287300  | 0.06507800                                                          |
| C   | -0.99085000                   | -1.19339800 | -0.82352600                                                         |
| C   | -3.27280400                   | 0.03646400  | 0.33909700                                                          |
| C   | -2.16507400                   | -1.89838200 | -0.63319000                                                         |
| C   | -3.29539400                   | -1.28840400 | -0.05618800                                                         |
| C   | 1.95125500                    | -0.89148200 | 0.60441500                                                          |
| H   | 1.90981400                    | 1.95300300  | -1.28114600                                                         |
| H   | 1.52796200                    | 0.31658900  | -1.80190300                                                         |
| H   | 2.49278700                    | 1.14331800  | 0.96740400                                                          |
| H   | -0.02342700                   | 3.26869700  | 0.20688000                                                          |
| H   | -2.39241600                   | 2.72569600  | 0.84419100                                                          |
| H   | -0.12448600                   | -1.67520100 | -1.26375700                                                         |
| H   | -4.14393400                   | 0.50599900  | 0.78116700                                                          |
| H   | -4.20138900                   | -1.86716100 | 0.07811000                                                          |
| H   | 3.81081300                    | -0.37614100 | -1.15859900                                                         |
| H   | 4.48725800                    | 0.10982000  | 0.24049400                                                          |

|                                      |             |                                                                     |             |
|--------------------------------------|-------------|---------------------------------------------------------------------|-------------|
| H                                    | 0.84593300  | -1.66915300                                                         | 1.90746900  |
| H                                    | -2.22121900 | -2.93721400                                                         | -0.93544800 |
| <b>Stable Neutral form (2) - Gas</b> |             | <b>C<sub>11</sub>H<sub>12</sub>N<sub>2</sub>O<sub>2</sub> - Gas</b> |             |
| 0 1                                  |             |                                                                     |             |
| O                                    | 1.23528100  | -0.80156600                                                         | 1.73240700  |
| O                                    | 2.13408500  | -1.92839500                                                         | 0.02188000  |
| N                                    | -1.76930300 | 2.05065200                                                          | 0.43675500  |
| N                                    | 3.80233900  | 0.36589200                                                          | -0.46254100 |
| C                                    | 0.09017900  | 1.16363000                                                          | -0.46594900 |
| C                                    | 1.49930900  | 0.99986900                                                          | -0.94383800 |
| C                                    | -0.93682200 | 0.15279900                                                          | -0.42722000 |
| C                                    | 2.47426800  | 0.45435800                                                          | 0.12127200  |
| C                                    | -2.08441000 | 0.74408600                                                          | 0.14700300  |
| C                                    | -0.46426000 | 2.29321800                                                          | 0.06537500  |
| C                                    | -0.99009700 | -1.19331400                                                         | -0.82312300 |
| C                                    | -3.27292800 | 0.03575500                                                          | 0.33862600  |
| C                                    | -2.16408100 | -1.89877600                                                         | -0.63302800 |
| C                                    | -3.29483600 | -1.28918500                                                         | -0.05647800 |
| C                                    | 1.95146600  | -0.89167600                                                         | 0.60397000  |
| H                                    | 1.90962500  | 1.95434400                                                          | -1.27945800 |
| H                                    | 1.52812000  | 0.31831600                                                          | -1.80161100 |
| H                                    | 2.49249400  | 1.14294400                                                          | 0.96847100  |
| H                                    | -0.02470800 | 3.26920300                                                          | 0.20729500  |
| H                                    | -2.39369200 | 2.72536800                                                          | 0.84388700  |
| H                                    | -0.12339400 | -1.67484000                                                         | -1.26299900 |
| H                                    | -4.14439500 | 0.50497300                                                          | 0.78037000  |
| H                                    | -4.20063000 | -1.86830400                                                         | 0.07761900  |
| H                                    | 3.81069600  | -0.37484200                                                         | -1.15863900 |

|                                      |             |             |                                                                     |
|--------------------------------------|-------------|-------------|---------------------------------------------------------------------|
| H                                    | 4.48705100  | 0.11025800  | 0.24075700                                                          |
| H                                    | 0.84560800  | -1.67043500 | 1.90599100                                                          |
| H                                    | -2.21968800 | -2.93767900 | -0.93513700                                                         |
| <b>Stable Neutral form (3) - Gas</b> |             |             | <b>C<sub>11</sub>H<sub>12</sub>N<sub>2</sub>O<sub>2</sub> - Gas</b> |
| 0 1                                  |             |             |                                                                     |
| O                                    | 1.43830300  | -0.91762500 | 1.46133200                                                          |
| O                                    | 3.56138900  | -1.30669800 | 1.01550200                                                          |
| N                                    | -1.58783600 | 1.94509100  | 0.61336700                                                          |
| N                                    | 3.70874100  | 0.31340000  | -1.10320000                                                         |
| C                                    | -0.01976900 | 0.77406300  | -0.49797300                                                         |
| C                                    | 1.26575200  | 0.38133100  | -1.17087100                                                         |
| C                                    | -1.22922300 | -0.01052300 | -0.42755700                                                         |
| C                                    | 2.52286200  | 0.42847500  | -0.27532400                                                         |
| C                                    | -2.18623800 | 0.75383000  | 0.27571400                                                          |
| C                                    | -0.29188100 | 1.95069700  | 0.15218900                                                          |
| C                                    | -1.58166100 | -1.28967200 | -0.88790700                                                         |
| C                                    | -3.47676800 | 0.28296300  | 0.53273500                                                          |
| C                                    | -2.85576300 | -1.75833500 | -0.63717000                                                         |
| C                                    | -3.79433800 | -0.97802300 | 0.06643200                                                          |
| C                                    | 2.56574500  | -0.68722100 | 0.77589500                                                          |
| H                                    | 1.46235300  | 1.04335100  | -2.01837100                                                         |
| H                                    | 1.18115900  | -0.62468600 | -1.58924800                                                         |
| H                                    | 2.49101900  | 1.36306400  | 0.30924700                                                          |
| H                                    | 0.34140200  | 2.80932100  | 0.31799600                                                          |
| H                                    | -2.01844300 | 2.68520300  | 1.14149300                                                          |
| H                                    | -0.86600800 | -1.89896200 | -1.42793800                                                         |
| H                                    | -4.19880200 | 0.88132500  | 1.07567700                                                          |
| H                                    | -4.78527600 | -1.37721400 | 0.24615100                                                          |

|                                      |             |             |                                                                     |
|--------------------------------------|-------------|-------------|---------------------------------------------------------------------|
| H                                    | 4.47129600  | -0.09215700 | -0.57158500                                                         |
| H                                    | 3.99545100  | 1.21270000  | -1.46737000                                                         |
| H                                    | 0.71304000  | -0.35906900 | 1.14481700                                                          |
| H                                    | -3.14338100 | -2.74323100 | -0.98368800                                                         |
| <b>Stable Neutral form (4) - Gas</b> |             |             | <b>C<sub>11</sub>H<sub>12</sub>N<sub>2</sub>O<sub>2</sub> - Gas</b> |
| 0 1                                  |             |             |                                                                     |
| O                                    | 1.17226800  | -0.89430100 | 1.63899500                                                          |
| O                                    | 2.48083700  | -1.91465800 | 0.18229700                                                          |
| N                                    | -1.79494600 | 2.02604300  | 0.44632000                                                          |
| N                                    | 3.83876800  | 0.36301200  | -0.39681100                                                         |
| C                                    | 0.05850400  | 1.12004400  | -0.45085500                                                         |
| C                                    | 1.45400700  | 0.94224300  | -0.96550700                                                         |
| C                                    | -0.98131600 | 0.12076100  | -0.41993700                                                         |
| C                                    | 2.48197600  | 0.47848900  | 0.09970200                                                          |
| C                                    | -2.12513400 | 0.72369400  | 0.14479800                                                          |
| C                                    | -0.48560300 | 2.25650400  | 0.08539100                                                          |
| C                                    | -1.03559700 | -1.22776900 | -0.80546700                                                         |
| C                                    | -3.32281800 | 0.02671500  | 0.32565200                                                          |
| C                                    | -2.21737600 | -1.91987300 | -0.63031700                                                         |
| C                                    | -3.35048400 | -1.29656100 | -0.07178900                                                         |
| C                                    | 2.06330200  | -0.88885700 | 0.63671000                                                          |
| H                                    | 1.82243200  | 1.88895800  | -1.37193400                                                         |
| H                                    | 1.46512200  | 0.21478900  | -1.78381700                                                         |
| H                                    | 2.45870100  | 1.19967300  | 0.92589100                                                          |
| H                                    | -0.04207300 | 3.23207800  | 0.21952600                                                          |
| H                                    | -2.41634300 | 2.70801200  | 0.84673600                                                          |
| H                                    | -0.16051900 | -1.72221800 | -1.21428500                                                         |
| H                                    | -4.19386100 | 0.50222700  | 0.76100000                                                          |

|                                      |             |             |                                                                     |
|--------------------------------------|-------------|-------------|---------------------------------------------------------------------|
| H                                    | -4.26192500 | -1.86853800 | 0.05371400                                                          |
| H                                    | 4.04616300  | 1.09002900  | -1.07101900                                                         |
| H                                    | 0.82656800  | -0.00520400 | 1.78628800                                                          |
| H                                    | 3.96312900  | -0.54141400 | -0.84169100                                                         |
| H                                    | -2.27574700 | -2.96243400 | -0.91760300                                                         |
| <b>Stable Neutral form (5) - Gas</b> |             |             | <b>C<sub>11</sub>H<sub>12</sub>N<sub>2</sub>O<sub>2</sub> - Gas</b> |
| 0 1                                  |             |             |                                                                     |
| O                                    | 1.55331000  | -0.57887300 | 1.98982000                                                          |
| O                                    | 1.89590700  | -1.83662800 | 0.17007700                                                          |
| N                                    | -1.64946300 | 2.05793500  | 0.44145000                                                          |
| N                                    | 3.80881100  | 0.04947500  | -0.47969300                                                         |
| C                                    | 0.09954400  | 1.07619100  | -0.57380200                                                         |
| C                                    | 1.47425300  | 0.80771200  | -1.10410000                                                         |
| C                                    | -0.97405500 | 0.12114000  | -0.46825700                                                         |
| C                                    | 2.49139300  | 0.44539000  | 0.00444400                                                          |
| C                                    | -2.05136500 | 0.77095200  | 0.17445500                                                          |
| C                                    | -0.35839500 | 2.23197400  | -0.00661300                                                         |
| C                                    | -1.12610700 | -1.21473800 | -0.86974700                                                         |
| C                                    | -3.26302600 | 0.12630900  | 0.43487600                                                          |
| C                                    | -2.32321300 | -1.85701100 | -0.61460000                                                         |
| C                                    | -3.38113700 | -1.19174100 | 0.03521400                                                          |
| C                                    | 1.93614100  | -0.67556300 | 0.86083300                                                          |
| H                                    | 1.86504400  | 1.68036800  | -1.63609800                                                         |
| H                                    | 1.44139200  | -0.01865500 | -1.82108100                                                         |
| H                                    | 2.60440800  | 1.29693900  | 0.67778500                                                          |
| H                                    | 0.14055400  | 3.18133000  | 0.11764200                                                          |
| H                                    | -2.20271900 | 2.75785000  | 0.90499600                                                          |
| H                                    | -0.31464000 | -1.73156700 | -1.36995200                                                         |



|                                      |             |             |                                                                     |
|--------------------------------------|-------------|-------------|---------------------------------------------------------------------|
| H                                    | -4.07886600 | 0.63815200  | 0.93222000                                                          |
| H                                    | -4.30636500 | -1.72284300 | 0.22377200                                                          |
| H                                    | 4.22468500  | 0.79993800  | -1.02007400                                                         |
| H                                    | 3.72980000  | -0.76206700 | -1.08462600                                                         |
| H                                    | 1.49994500  | -2.50322100 | 0.74781800                                                          |
| H                                    | -2.45661100 | -2.88777800 | -0.92008800                                                         |
| <b>Stable Neutral form (6) - Gas</b> |             |             | <b>C<sub>11</sub>H<sub>12</sub>N<sub>2</sub>O<sub>2</sub> - Gas</b> |
| 0 1                                  |             |             |                                                                     |
| O                                    | 1.27896300  | -0.99333000 | 1.66259300                                                          |
| O                                    | 2.44087400  | -1.86794300 | -0.02339800                                                         |
| N                                    | -1.89264200 | 2.02847900  | 0.40872500                                                          |
| N                                    | 3.74243200  | 0.39848600  | -0.43555200                                                         |
| C                                    | 0.01311800  | 1.15655500  | -0.39882100                                                         |
| C                                    | 1.42501800  | 1.01995100  | -0.87223000                                                         |
| C                                    | -0.99130600 | 0.12489900  | -0.37008300                                                         |
| C                                    | 2.42586300  | 0.53071000  | 0.19472600                                                          |
| C                                    | -2.17084100 | 0.70729200  | 0.14051000                                                          |
| C                                    | -0.58125600 | 2.28936200  | 0.08111900                                                          |
| C                                    | -0.99681100 | -1.23262700 | -0.72319200                                                         |
| C                                    | -3.35302200 | -0.01942100 | 0.30036200                                                          |
| C                                    | -2.16352500 | -1.95549100 | -0.56862200                                                         |
| C                                    | -3.33103300 | -1.35307600 | -0.06209900                                                         |
| C                                    | 1.99022500  | -0.84137900 | 0.71571600                                                          |
| H                                    | 1.78659300  | 1.98936700  | -1.23170900                                                         |
| H                                    | 1.46969200  | 0.33070800  | -1.72332700                                                         |
| H                                    | 2.40056100  | 1.21456400  | 1.04798600                                                          |
| H                                    | -0.16899100 | 3.27905600  | 0.20948900                                                          |
| H                                    | -2.54081800 | 2.69543000  | 0.79071900                                                          |

|                     |             |                                                                                   |             |
|---------------------|-------------|-----------------------------------------------------------------------------------|-------------|
| H                   | -0.09588300 | -1.71364100                                                                       | -1.08947400 |
| H                   | -4.25055500 | 0.44140400                                                                        | 0.69620300  |
| H                   | -4.22911500 | -1.94858200                                                                       | 0.05046100  |
| H                   | 4.48863100  | 0.39627700                                                                        | 0.25139300  |
| H                   | 3.92035700  | 1.16066900                                                                        | -1.07977700 |
| H                   | 3.09550700  | -1.49784500                                                                       | -0.64254600 |
| H                   | -2.18178300 | -3.00662000                                                                       | -0.82949400 |
| <b>Cation - Gas</b> |             | <b>[C<sub>11</sub>H<sub>12</sub>N<sub>2</sub>O<sub>2</sub>]<sup>+</sup> - Gas</b> |             |
| 1 2                 |             |                                                                                   |             |
| O                   | 1.31713900  | -0.47330100                                                                       | 1.89940400  |
| O                   | 1.84886500  | -1.91461900                                                                       | 0.26744500  |
| N                   | -1.60760000 | 2.08304100                                                                        | 0.41303700  |
| N                   | 3.76625000  | 0.10309300                                                                        | -0.61432500 |
| C                   | 0.13159500  | 1.04982600                                                                        | -0.58036000 |
| C                   | 1.50354200  | 0.83099300                                                                        | -1.09289300 |
| C                   | -0.92950300 | 0.11672300                                                                        | -0.48673800 |
| C                   | 2.50590600  | 0.38744000                                                                        | 0.02060300  |
| C                   | -2.02099700 | 0.76419600                                                                        | 0.13846100  |
| C                   | -0.35928100 | 2.25951400                                                                        | 0.00322800  |
| C                   | -1.05229500 | -1.23058400                                                                       | -0.87433000 |
| C                   | -3.21582900 | 0.14141100                                                                        | 0.38996300  |
| C                   | -2.25822800 | -1.87799500                                                                       | -0.62384000 |
| C                   | -3.31481100 | -1.20787800                                                                       | -0.00902700 |
| C                   | 1.88218400  | -0.80976800                                                                       | 0.73227400  |
| H                   | 1.91251300  | 1.73866300                                                                        | -1.53970100 |
| H                   | 1.49675300  | 0.04516500                                                                        | -1.85253700 |
| H                   | 2.62985500  | 1.19861400                                                                        | 0.74021000  |
| H                   | 0.15201700  | 3.20554300                                                                        | 0.11740800  |

|                                    |             |             |                                                                                   |
|------------------------------------|-------------|-------------|-----------------------------------------------------------------------------------|
| H                                  | -2.17960600 | 2.79341500  | 0.85314400                                                                        |
| H                                  | -0.22546100 | -1.75017200 | -1.34486600                                                                       |
| H                                  | -4.04747300 | 0.64364300  | 0.86882700                                                                        |
| H                                  | -4.24459500 | -1.73394300 | 0.17093200                                                                        |
| H                                  | 3.74377900  | -0.79974300 | -1.07950700                                                                       |
| H                                  | 4.53223600  | 0.10103100  | 0.04869300                                                                        |
| H                                  | 0.93833400  | -1.27108200 | 2.29910100                                                                        |
| H                                  | -2.38065700 | -2.91397500 | -0.91152700                                                                       |
| <b>Radical Form (N3-H20) - Gas</b> |             |             | <b>[C<sub>11</sub>H<sub>11</sub>N<sub>2</sub>O<sub>2</sub>]<sup>•</sup> - Gas</b> |
| 0 2                                |             |             |                                                                                   |
| O                                  | 1.21343600  | -0.62962200 | 1.80175800                                                                        |
| O                                  | 1.98565000  | -1.94225800 | 0.15991800                                                                        |
| N                                  | -1.67027600 | 2.14687700  | 0.49627200                                                                        |
| N                                  | 3.77855600  | 0.21524900  | -0.53470300                                                                       |
| C                                  | 0.10981600  | 1.10565500  | -0.53087300                                                                       |
| C                                  | 1.49611300  | 0.90894600  | -1.02773700                                                                       |
| C                                  | -0.95202500 | 0.14770800  | -0.47588200                                                                       |
| C                                  | 2.47475900  | 0.41420700  | 0.06828900                                                                        |
| C                                  | -2.02357600 | 0.82004000  | 0.16415300                                                                        |
| C                                  | -0.43867200 | 2.29059900  | 0.09075800                                                                        |
| C                                  | -1.08332700 | -1.17911900 | -0.88286900                                                                       |
| C                                  | -3.22309200 | 0.18446600  | 0.39989200                                                                        |
| C                                  | -2.29983700 | -1.82114400 | -0.64241400                                                                       |
| C                                  | -3.34886700 | -1.15076800 | -0.01387100                                                                       |
| C                                  | 1.88792500  | -0.85770900 | 0.66857100                                                                        |
| H                                  | 1.91017400  | 1.84059700  | -1.41902600                                                                       |
| H                                  | 1.50693000  | 0.16765400  | -1.83374700                                                                       |
| H                                  | 2.54557200  | 1.17054700  | 0.85234800                                                                        |

|                             |             |                                                                                   |             |
|-----------------------------|-------------|-----------------------------------------------------------------------------------|-------------|
| H                           | 0.09295100  | 3.22723900                                                                        | 0.21903600  |
| H                           | -0.26576300 | -1.70555200                                                                       | -1.36400100 |
| H                           | -4.03652700 | 0.70482400                                                                        | 0.89090100  |
| H                           | -4.28287400 | -1.67242400                                                                       | 0.15907400  |
| H                           | 3.75252600  | -0.60746100                                                                       | -1.13123200 |
| H                           | 4.48127000  | 0.04313400                                                                        | 0.17603000  |
| H                           | 0.78130800  | -1.45423900                                                                       | 2.06705700  |
| H                           | -2.43151800 | -2.85146000                                                                       | -0.94894600 |
| <b>Anion (N3-H20) - Gas</b> |             | <b>[C<sub>11</sub>H<sub>11</sub>N<sub>2</sub>O<sub>2</sub>]<sup>+</sup> - Gas</b> |             |
| -1 1                        |             |                                                                                   |             |
| O                           | 1.15776200  | -0.93297300                                                                       | 1.62532900  |
| O                           | 2.19490400  | -1.91750600                                                                       | -0.09592200 |
| N                           | -1.83470200 | 2.13307600                                                                        | 0.47010500  |
| N                           | 3.81500300  | 0.43108300                                                                        | -0.34898800 |
| C                           | 0.07015800  | 1.18581200                                                                        | -0.44433000 |
| C                           | 1.49592400  | 1.05552300                                                                        | -0.87332500 |
| C                           | -0.94017300 | 0.18598300                                                                        | -0.42403900 |
| C                           | 2.45640800  | 0.45831500                                                                        | 0.18713200  |
| C                           | -2.08959600 | 0.83219600                                                                        | 0.15848700  |
| C                           | -0.54774000 | 2.31436300                                                                        | 0.10638700  |
| C                           | -1.01843700 | -1.16808600                                                                       | -0.80303600 |
| C                           | -3.27739900 | 0.10570500                                                                        | 0.34382200  |
| C                           | -2.20206600 | -1.86257200                                                                       | -0.60269900 |
| C                           | -3.32711600 | -1.22754900                                                                       | -0.02997200 |
| C                           | 1.94433200  | -0.92477000                                                                       | 0.54331600  |
| H                           | 1.91472300  | 2.03286900                                                                        | -1.13282000 |
| H                           | 1.58090500  | 0.42104000                                                                        | -1.76753300 |
| H                           | 2.42232100  | 1.08703200                                                                        | 1.07894600  |

|                               |             |                                                                                      |             |
|-------------------------------|-------------|--------------------------------------------------------------------------------------|-------------|
| H                             | -0.07306700 | 3.28345700                                                                           | 0.24517000  |
| H                             | -0.16308400 | -1.67151400                                                                          | -1.24773200 |
| H                             | -4.13933100 | 0.59788500                                                                           | 0.78447900  |
| H                             | -4.24145700 | -1.79459700                                                                          | 0.11517500  |
| H                             | 3.81839200  | -0.18122000                                                                          | -1.16092500 |
| H                             | 4.44587200  | 0.00363200                                                                           | 0.32208900  |
| H                             | 0.63553700  | -1.74769500                                                                          | 1.60582700  |
| H                             | -2.27000000 | -2.90568400                                                                          | -0.89620800 |
| <b>Inter1-N3-H20-HAT- Gas</b> |             | <b>C<sub>11</sub>H<sub>12</sub>N<sub>2</sub>O<sub>2</sub> + HOO<sup>•</sup>- Gas</b> |             |
| 0 2                           |             |                                                                                      |             |
| O                             | -1.90210000 | -0.17355600                                                                          | 1.84581000  |
| O                             | -3.55284900 | 0.23452900                                                                           | 0.39250900  |
| N                             | 2.01334200  | -0.02404300                                                                          | -0.05108600 |
| N                             | -3.31328300 | -2.50467700                                                                          | -0.46254900 |
| C                             | -0.07214600 | -0.54123900                                                                          | -0.72192300 |
| C                             | -1.28167900 | -1.32775100                                                                          | -1.12051000 |
| C                             | 0.01187200  | 0.88321300                                                                           | -0.52400300 |
| C                             | -2.19808700 | -1.72837100                                                                          | 0.05536200  |
| C                             | 1.33147600  | 1.16716800                                                                           | -0.10173900 |
| C                             | 1.16522300  | -1.04101800                                                                          | -0.42501000 |
| C                             | -0.90212300 | 1.94005700                                                                           | -0.66365100 |
| C                             | 1.75800800  | 2.46689700                                                                           | 0.18475300  |
| C                             | -0.48347100 | 3.22677100                                                                           | -0.37809200 |
| C                             | 0.83516700  | 3.48691100                                                                           | 0.04332100  |
| C                             | -2.64460000 | -0.45946400                                                                          | 0.76807200  |
| H                             | -0.99529400 | -2.25639600                                                                          | -1.61812300 |
| H                             | -1.88629000 | -0.75425000                                                                          | -1.83244600 |
| H                             | -1.62424300 | -2.33675900                                                                          | 0.75706700  |

|                            |             |                                                                                      |             |
|----------------------------|-------------|--------------------------------------------------------------------------------------|-------------|
| H                          | 1.51901200  | -2.06050600                                                                          | -0.45424700 |
| H                          | 2.98319600  | -0.14532400                                                                          | 0.20155000  |
| H                          | -1.92146200 | 1.75083700                                                                           | -0.98242200 |
| H                          | 2.77352000  | 2.66704400                                                                           | 0.50624500  |
| H                          | 1.13231200  | 4.50652900                                                                           | 0.25800100  |
| H                          | -3.91190200 | -1.89651600                                                                          | -1.01517300 |
| H                          | -3.88507400 | -2.86001000                                                                          | 0.29644800  |
| H                          | -2.16587500 | 0.70242900                                                                           | 2.16196800  |
| H                          | -1.17779900 | 4.05185200                                                                           | -0.48231500 |
| O                          | 4.76037700  | -1.27586700                                                                          | 0.48604900  |
| O                          | 4.22127400  | -2.41328200                                                                          | 0.13896700  |
| H                          | 4.92804300  | -3.08152400                                                                          | 0.19273300  |
| <b>TS- N3-H20-HAT- Gas</b> |             | <b>C<sub>11</sub>H<sub>12</sub>N<sub>2</sub>O<sub>2</sub> + HOO<sup>•</sup>- Gas</b> |             |
| 0 2                        |             |                                                                                      |             |
| O                          | -2.08079500 | 0.34708600                                                                           | 1.73515900  |
| O                          | -3.37705800 | 0.90062200                                                                           | -0.00399200 |
| N                          | 1.84610000  | -0.54680700                                                                          | 0.70952800  |
| N                          | -3.70257100 | -1.92304700                                                                          | -0.49731300 |
| C                          | -0.10854000 | -0.74256000                                                                          | -0.42667500 |
| C                          | -1.37801200 | -1.33922100                                                                          | -0.92946300 |
| C                          | 0.25816200  | 0.65492200                                                                           | -0.42448700 |
| C                          | -2.52038000 | -1.34755300                                                                          | 0.11544200  |
| C                          | 1.49099600  | 0.73184800                                                                           | 0.25738600  |
| C                          | 0.91688700  | -1.40645300                                                                          | 0.24361900  |
| C                          | -0.33281600 | 1.81238500                                                                           | -0.92989300 |
| C                          | 2.16798700  | 1.92690900                                                                           | 0.41792900  |
| C                          | 0.34147600  | 3.02178800                                                                           | -0.76505200 |
| C                          | 1.57276600  | 3.07643700                                                                           | -0.10823000 |

|                |             |             |             |       |       |       |         |       |       |  |
|----------------|-------------|-------------|-------------|-------|-------|-------|---------|-------|-------|--|
| C              | -2.73001400 | 0.08331100  | 0.59463600  |       |       |       |         |       |       |  |
| H              | -1.22807500 | -2.37617200 | -1.23557400 |       |       |       |         |       |       |  |
| H              | -1.73308300 | -0.78033200 | -1.80219800 |       |       |       |         |       |       |  |
| H              | -2.21478500 | -1.95840300 | 0.96697600  |       |       |       |         |       |       |  |
| H              | 1.00189600  | -2.46559600 | 0.44138500  |       |       |       |         |       |       |  |
| H              | 2.97638900  | -0.89199400 | 0.70014600  |       |       |       |         |       |       |  |
| H              | -1.29543500 | 1.77969800  | -1.42856300 |       |       |       |         |       |       |  |
| H              | 3.12189200  | 1.96685800  | 0.92998200  |       |       |       |         |       |       |  |
| H              | 2.07566300  | 4.03007000  | -0.00104800 |       |       |       |         |       |       |  |
| H              | -4.08987700 | -1.26467400 | -1.16797800 |       |       |       |         |       |       |  |
| H              | -4.42132100 | -2.09487800 | 0.19723300  |       |       |       |         |       |       |  |
| H              | -2.17239400 | 1.29248100  | 1.92203100  |       |       |       |         |       |       |  |
| H              | -0.09508000 | 3.93393000  | -1.15322900 |       |       |       |         |       |       |  |
| O              | 4.08088300  | -1.29744200 | 0.25591900  |       |       |       |         |       |       |  |
| O              | 3.74987600  | -2.49386100 | -0.34479800 |       |       |       |         |       |       |  |
| H              | 4.01519200  | -2.36413900 | -1.26424300 |       |       |       |         |       |       |  |
| Frequencies -- | -2555.3767  |             | 31.2234     |       |       |       | 39.8388 |       |       |  |
| Red. masses -- | 1.1404      |             | 6.9820      |       |       |       | 5.9234  |       |       |  |
| Frc consts --  | 4.3876      |             | 0.0040      |       |       |       | 0.0055  |       |       |  |
| IR Inten --    | 62171.0851  |             | 0.7277      |       |       |       | 0.2727  |       |       |  |
| Atom AN        | X           | Y           | Z           | X     | Y     | Z     | X       | Y     | Z     |  |
| 1 8            | 0.00        | 0.00        | 0.00        | 0.15  | -0.20 | 0.09  | -0.10   | 0.17  | -0.08 |  |
| 2 8            | 0.00        | 0.00        | 0.00        | 0.06  | 0.02  | 0.23  | -0.14   | -0.04 | -0.11 |  |
| 3 7            | -0.03       | -0.02       | 0.00        | -0.04 | 0.02  | -0.13 | 0.09    | -0.02 | -0.17 |  |
| 4 7            | 0.00        | 0.00        | 0.00        | -0.04 | 0.07  | -0.05 | 0.02    | -0.09 | 0.10  |  |
| 5 6            | -0.02       | 0.02        | -0.01       | -0.03 | 0.05  | -0.14 | 0.00    | 0.02  | -0.02 |  |
| 6 6            | 0.00        | 0.00        | 0.00        | -0.05 | 0.07  | -0.13 | -0.02   | 0.02  | 0.03  |  |
| 7 6            | 0.00        | 0.01        | 0.00        | -0.03 | 0.05  | -0.10 | -0.01   | 0.03  | 0.03  |  |

|    |   |       |       |       |       |       |       |       |       |       |
|----|---|-------|-------|-------|-------|-------|-------|-------|-------|-------|
| 8  | 6 | 0.00  | 0.00  | 0.00  | 0.01  | -0.02 | -0.06 | 0.00  | 0.03  | 0.05  |
| 9  | 6 | -0.01 | 0.01  | 0.00  | -0.03 | 0.03  | -0.10 | 0.04  | 0.00  | -0.06 |
| 10 | 6 | 0.04  | 0.01  | 0.02  | -0.03 | 0.03  | -0.15 | 0.06  | 0.00  | -0.14 |
| 11 | 6 | 0.00  | -0.01 | 0.00  | -0.04 | 0.06  | -0.06 | -0.07 | 0.05  | 0.15  |
| 12 | 6 | 0.00  | -0.01 | 0.00  | -0.04 | 0.03  | -0.07 | 0.04  | 0.00  | -0.04 |
| 13 | 6 | 0.01  | 0.01  | 0.00  | -0.05 | 0.06  | -0.03 | -0.07 | 0.05  | 0.18  |
| 14 | 6 | -0.01 | 0.00  | 0.00  | -0.04 | 0.04  | -0.04 | -0.02 | 0.02  | 0.08  |
| 15 | 6 | 0.00  | 0.00  | 0.00  | 0.07  | -0.06 | 0.10  | -0.09 | 0.05  | -0.06 |
| 16 | 1 | 0.01  | 0.00  | 0.01  | -0.06 | 0.10  | -0.22 | -0.02 | 0.01  | 0.04  |
| 17 | 1 | 0.00  | 0.00  | 0.00  | -0.10 | 0.14  | -0.06 | -0.04 | 0.00  | 0.02  |
| 18 | 1 | 0.00  | 0.00  | 0.00  | 0.05  | -0.11 | -0.15 | 0.05  | 0.10  | 0.08  |
| 19 | 1 | 0.01  | 0.00  | 0.00  | -0.03 | 0.03  | -0.16 | 0.08  | -0.01 | -0.20 |
| 20 | 1 | 0.88  | -0.34 | -0.31 | -0.04 | 0.02  | -0.02 | 0.09  | -0.01 | -0.16 |
| 21 | 1 | 0.00  | 0.00  | -0.01 | -0.05 | 0.07  | -0.05 | -0.10 | 0.08  | 0.22  |
| 22 | 1 | 0.00  | -0.01 | 0.00  | -0.03 | 0.02  | -0.07 | 0.08  | -0.02 | -0.11 |
| 23 | 1 | 0.00  | 0.00  | 0.00  | -0.04 | 0.04  | -0.02 | -0.02 | 0.02  | 0.11  |
| 24 | 1 | 0.00  | 0.00  | 0.00  | -0.06 | 0.15  | 0.04  | -0.03 | -0.16 | 0.06  |
| 25 | 1 | 0.00  | -0.01 | 0.00  | 0.00  | 0.01  | -0.03 | 0.04  | -0.08 | 0.13  |
| 26 | 1 | 0.00  | 0.00  | 0.01  | 0.18  | -0.22 | 0.20  | -0.15 | 0.18  | -0.15 |
| 27 | 1 | 0.00  | 0.00  | 0.00  | -0.05 | 0.07  | 0.00  | -0.11 | 0.07  | 0.27  |
| 28 | 8 | -0.02 | 0.05  | 0.03  | 0.00  | -0.02 | 0.11  | 0.10  | -0.04 | -0.10 |
| 29 | 8 | -0.01 | -0.03 | -0.02 | 0.06  | -0.14 | 0.32  | 0.14  | -0.19 | 0.17  |
| 30 | 1 | 0.00  | 0.01  | 0.02  | 0.13  | -0.32 | 0.32  | 0.17  | -0.40 | 0.15  |

Zero-point correction= 0.232083 (Hartree/Particle)

Thermal correction to Energy= 0.248393

Thermal correction to Enthalpy= 0.249338

Thermal correction to Gibbs Free Energy= 0.185812

Sum of electronic and zero-point Energies= -836.924276



|                                              |             |                                                                           |                |
|----------------------------------------------|-------------|---------------------------------------------------------------------------|----------------|
| Sum of electronic and thermal Energies=      |             |                                                                           | -836.907966    |
| Sum of electronic and thermal Enthalpies=    |             |                                                                           | -836.907021    |
| Sum of electronic and thermal Free Energies= |             |                                                                           | -836.970547    |
|                                              | E (Thermal) | CV                                                                        | S              |
|                                              | KCal/Mol    | Cal/Mol-Kelvin                                                            | Cal/Mol-Kelvin |
| Total                                        | 155.869     | 60.234                                                                    | 133.702        |
| Electronic                                   | 0.000       | 0.000                                                                     | 1.377          |
| Translational                                | 0.889       | 2.981                                                                     | 42.291         |
| Rotational                                   | 0.889       | 2.981                                                                     | 33.061         |
| Vibrational                                  | 154.092     | 54.272                                                                    | 56.972         |
| HF=-837.1563589                              |             |                                                                           |                |
| <b>Inter2-N3-H20-HAT- Gas</b>                |             | <b>C<sub>11</sub>H<sub>12</sub>N<sub>2</sub>O<sub>2</sub> + HOO·- Gas</b> |                |
| 0 2                                          |             |                                                                           |                |
| O                                            | -1.69547600 | -0.29190900                                                               | 1.87442300     |
| O                                            | -3.40899400 | 0.29826500                                                                | 0.55870000     |
| N                                            | 2.02921300  | -0.08580900                                                               | -0.02893700    |
| N                                            | -3.33483400 | -2.38831400                                                               | -0.50732500    |
| C                                            | -0.10642200 | -0.45684200                                                               | -0.78470600    |
| C                                            | -1.31264300 | -1.21878900                                                               | -1.19614000    |
| C                                            | 0.01935600  | 0.95179800                                                                | -0.57522300    |
| C                                            | -2.17131900 | -1.69298400                                                               | 0.00573200     |
| C                                            | 1.34242700  | 1.14568700                                                                | -0.10594500    |
| C                                            | 1.18277900  | -1.00049200                                                               | -0.41954800    |
| C                                            | -0.84984600 | 2.03348400                                                                | -0.71896400    |
| C                                            | 1.81129500  | 2.39989700                                                                | 0.21596700     |
| C                                            | -0.37501900 | 3.30419800                                                                | -0.39078700    |
| C                                            | 0.93049900  | 3.48269000                                                                | 0.06617400     |

|                                |             |                                                                                   |             |
|--------------------------------|-------------|-----------------------------------------------------------------------------------|-------------|
| C                              | -2.51941900 | -0.46160900                                                                       | 0.83368100  |
| H                              | -1.03963200 | -2.11497500                                                                       | -1.75667000 |
| H                              | -1.95285100 | -0.59950800                                                                       | -1.83267300 |
| H                              | -1.57826500 | -2.37216900                                                                       | 0.62078200  |
| H                              | 1.47185400  | -2.04479100                                                                       | -0.45357200 |
| H                              | 3.61024900  | -0.82116600                                                                       | 0.57558800  |
| H                              | -1.86880500 | 1.89479100                                                                        | -1.06389200 |
| H                              | 2.82358100  | 2.54067100                                                                        | 0.57469800  |
| H                              | 1.27356700  | 4.48061700                                                                        | 0.31216300  |
| H                              | -3.98067900 | -1.71606400                                                                       | -0.91251800 |
| H                              | -3.82918200 | -2.86416800                                                                       | 0.23933000  |
| H                              | -1.90715700 | 0.55484300                                                                        | 2.29353000  |
| H                              | -1.02703900 | 4.16273200                                                                        | -0.49279700 |
| O                              | 4.30812000  | -1.48444200                                                                       | 0.76737800  |
| O                              | 3.89927400  | -2.54129200                                                                       | -0.09840800 |
| H                              | 4.61018200  | -2.54914500                                                                       | -0.74834400 |
| <b>Anion (Adiabatic) - Gas</b> |             | <b>[C<sub>11</sub>H<sub>12</sub>N<sub>2</sub>O<sub>2</sub>]<sup>-</sup> - Gas</b> |             |
| -1 2                           |             |                                                                                   |             |
| O                              | 1.17367800  | -0.88181700                                                                       | 1.61967200  |
| O                              | 2.28228900  | -1.98057400                                                                       | 0.02133700  |
| N                              | -1.76872400 | 2.05236100                                                                        | 0.45030500  |
| N                              | 3.79338000  | 0.35191600                                                                        | -0.44878600 |
| C                              | 0.08097600  | 1.15467900                                                                        | -0.45722200 |
| C                              | 1.49038200  | 0.98796600                                                                        | -0.92646100 |
| C                              | -0.95206900 | 0.15477700                                                                        | -0.42977600 |
| C                              | 2.46295900  | 0.43539100                                                                        | 0.14162100  |
| C                              | -2.09595000 | 0.75560300                                                                        | 0.15361600  |
| C                              | -0.46648800 | 2.28408000                                                                        | 0.08838400  |

|                               |             |             |                                                                                   |
|-------------------------------|-------------|-------------|-----------------------------------------------------------------------------------|
| C                             | -1.01673600 | -1.18985000 | -0.82718800                                                                       |
| C                             | -3.28794700 | 0.05307600  | 0.34399900                                                                        |
| C                             | -2.19616200 | -1.88936100 | -0.63548900                                                                       |
| C                             | -3.32188500 | -1.27164700 | -0.05582600                                                                       |
| C                             | 1.99714400  | -0.94314500 | 0.55986300                                                                        |
| H                             | 1.89165800  | 1.95912800  | -1.23601500                                                                       |
| H                             | 1.54645600  | 0.32227300  | -1.79306600                                                                       |
| H                             | 2.40066500  | 1.08511300  | 1.02418900                                                                        |
| H                             | -0.02016600 | 3.25417400  | 0.25339800                                                                        |
| H                             | -2.36707400 | 2.73326800  | 0.90145300                                                                        |
| H                             | -0.15196300 | -1.67491100 | -1.26941200                                                                       |
| H                             | -4.15082600 | 0.53231800  | 0.79178000                                                                        |
| H                             | -4.23192600 | -1.84505800 | 0.08005400                                                                        |
| H                             | 4.44260500  | -0.09723300 | 0.18883000                                                                        |
| H                             | 4.13588500  | 1.29626700  | -0.60530600                                                                       |
| H                             | 0.77825200  | -1.75693800 | 1.73034100                                                                        |
| H                             | -2.25924200 | -2.92863600 | -0.93808700                                                                       |
| <b>Anion (Vertical) - Gas</b> |             |             | <b>[C<sub>11</sub>H<sub>12</sub>N<sub>2</sub>O<sub>2</sub>]<sup>-</sup> - Gas</b> |
| -1 2                          |             |             |                                                                                   |
| O                             | 1.23528100  | -0.80156600 | 1.73240700                                                                        |
| O                             | 2.13408500  | -1.92839500 | 0.02188000                                                                        |
| N                             | -1.76930300 | 2.05065200  | 0.43675500                                                                        |
| N                             | 3.80233900  | 0.36589200  | -0.46254100                                                                       |
| C                             | 0.09017900  | 1.16363000  | -0.46594900                                                                       |
| C                             | 1.49930900  | 0.99986900  | -0.94383800                                                                       |
| C                             | -0.93682200 | 0.15279900  | -0.42722000                                                                       |
| C                             | 2.47426800  | 0.45435800  | 0.12127200                                                                        |
| C                             | -2.08441000 | 0.74408600  | 0.14700300                                                                        |

|                                |             |                                                                                   |             |
|--------------------------------|-------------|-----------------------------------------------------------------------------------|-------------|
| C                              | -0.46426000 | 2.29321800                                                                        | 0.06537500  |
| C                              | -0.99009700 | -1.19331400                                                                       | -0.82312300 |
| C                              | -3.27292800 | 0.03575500                                                                        | 0.33862600  |
| C                              | -2.16408100 | -1.89877600                                                                       | -0.63302800 |
| C                              | -3.29483600 | -1.28918500                                                                       | -0.05647800 |
| C                              | 1.95146600  | -0.89167600                                                                       | 0.60397000  |
| H                              | 1.90962500  | 1.95434400                                                                        | -1.27945800 |
| H                              | 1.52812000  | 0.31831600                                                                        | -1.80161100 |
| H                              | 2.49249400  | 1.14294400                                                                        | 0.96847100  |
| H                              | -0.02470800 | 3.26920300                                                                        | 0.20729500  |
| H                              | -2.39369200 | 2.72536800                                                                        | 0.84388700  |
| H                              | -0.12339400 | -1.67484000                                                                       | -1.26299900 |
| H                              | -4.14439500 | 0.50497300                                                                        | 0.78037000  |
| H                              | -4.20063000 | -1.86830400                                                                       | 0.07761900  |
| H                              | 3.81069600  | -0.37484200                                                                       | -1.15863900 |
| H                              | 4.48705100  | 0.11025800                                                                        | 0.24075700  |
| H                              | 0.84560800  | -1.67043500                                                                       | 1.90599100  |
| H                              | -2.21968800 | -2.93767900                                                                       | -0.93513700 |
| <b>Cation (Vertical) - Gas</b> |             | <b>[C<sub>11</sub>H<sub>12</sub>N<sub>2</sub>O<sub>2</sub>]<sup>+</sup> - Gas</b> |             |
| 12                             |             |                                                                                   |             |
| O                              | 1.23528100  | -0.80156600                                                                       | 1.73240700  |
| O                              | 2.13408500  | -1.92839500                                                                       | 0.02188000  |
| N                              | -1.76930300 | 2.05065200                                                                        | 0.43675500  |
| N                              | 3.80233900  | 0.36589200                                                                        | -0.46254100 |
| C                              | 0.09017900  | 1.16363000                                                                        | -0.46594900 |
| C                              | 1.49930900  | 0.99986900                                                                        | -0.94383800 |
| C                              | -0.93682200 | 0.15279900                                                                        | -0.42722000 |
| C                              | 2.47426800  | 0.45435800                                                                        | 0.12127200  |

|   |             |             |             |
|---|-------------|-------------|-------------|
| C | -2.08441000 | 0.74408600  | 0.14700300  |
| C | -0.46426000 | 2.29321800  | 0.06537500  |
| C | -0.99009700 | -1.19331400 | -0.82312300 |
| C | -3.27292800 | 0.03575500  | 0.33862600  |
| C | -2.16408100 | -1.89877600 | -0.63302800 |
| C | -3.29483600 | -1.28918500 | -0.05647800 |
| C | 1.95146600  | -0.89167600 | 0.60397000  |
| H | 1.90962500  | 1.95434400  | -1.27945800 |
| H | 1.52812000  | 0.31831600  | -1.80161100 |
| H | 2.49249400  | 1.14294400  | 0.96847100  |
| H | -0.02470800 | 3.26920300  | 0.20729500  |
| H | -2.39369200 | 2.72536800  | 0.84388700  |
| H | -0.12339400 | -1.67484000 | -1.26299900 |
| H | -4.14439500 | 0.50497300  | 0.78037000  |
| H | -4.20063000 | -1.86830400 | 0.07761900  |
| H | 3.81069600  | -0.37484200 | -1.15863900 |
| H | 4.48705100  | 0.11025800  | 0.24075700  |
| H | 0.84560800  | -1.67043500 | 1.90599100  |
| H | -2.21968800 | -2.93767900 | -0.93513700 |

**Table S3.** Optimized structures of HLP forms in gas phase using M06-2X/6-311++g(d,p)

|     | <b>Stable Neutral form (1) - Gas</b> |             |             | <b>C<sub>11</sub>H<sub>12</sub>N<sub>2</sub>O<sub>3</sub> - Gas</b> |  |  |
|-----|--------------------------------------|-------------|-------------|---------------------------------------------------------------------|--|--|
| 0 1 |                                      |             |             |                                                                     |  |  |
| O   | -2.63928300                          | -2.63279200 | -0.54906900 |                                                                     |  |  |
| O   | 1.29231700                           | -0.60445800 | 1.79460000  |                                                                     |  |  |
| O   | 1.95073800                           | -2.10419300 | 0.27253000  |                                                                     |  |  |
| N   | -1.17396900                          | 2.58272400  | 0.30144200  |                                                                     |  |  |
| N   | 3.91615400                           | -0.29476100 | -0.57129200 |                                                                     |  |  |

|                                      |             |             |                                                                     |
|--------------------------------------|-------------|-------------|---------------------------------------------------------------------|
| C                                    | 0.46555800  | 1.29220700  | -0.53675300                                                         |
| C                                    | 1.79592800  | 0.81364200  | -1.02457900                                                         |
| C                                    | -0.71878300 | 0.49108100  | -0.37816200                                                         |
| C                                    | 2.69892700  | 0.18717600  | 0.06496400                                                          |
| C                                    | -1.72278500 | 1.32652200  | 0.15047700                                                          |
| C                                    | 0.13649100  | 2.55083600  | -0.11378300                                                         |
| C                                    | -1.00441800 | -0.86219600 | -0.63072900                                                         |
| C                                    | -3.00428600 | 0.84779300  | 0.43340200                                                          |
| C                                    | -2.27134400 | -1.33100300 | -0.34341300                                                         |
| C                                    | -3.26652900 | -0.48427500 | 0.18448500                                                          |
| C                                    | 1.96597500  | -0.98122600 | 0.69669100                                                          |
| H                                    | 2.35758200  | 1.64115400  | -1.46818100                                                         |
| H                                    | 1.67357000  | 0.05802700  | -1.80585400                                                         |
| H                                    | 2.85845300  | 0.93038800  | 0.85580200                                                          |
| H                                    | 0.74533900  | 3.44175500  | -0.07957600                                                         |
| H                                    | -1.65670500 | 3.39491700  | 0.64462000                                                          |
| H                                    | -0.24588800 | -1.52737900 | -1.03351200                                                         |
| H                                    | -3.77349500 | 1.49502600  | 0.83824700                                                          |
| H                                    | -4.24166300 | -0.90903100 | 0.38642500                                                          |
| H                                    | 4.43862500  | -0.91808400 | 0.03317500                                                          |
| H                                    | 4.51616400  | 0.48298400  | -0.81941600                                                         |
| H                                    | -1.89068400 | -3.12537300 | -0.89618600                                                         |
| H                                    | 0.74481500  | -1.35191400 | 2.07331000                                                          |
| <b>Stable Neutral form (2) - Gas</b> |             |             | <b>C<sub>11</sub>H<sub>12</sub>N<sub>2</sub>O<sub>3</sub> - Gas</b> |
| 0 1                                  |             |             |                                                                     |
| O                                    | -2.56738500 | -2.63613100 | -0.58284400                                                         |
| O                                    | 1.33948500  | -0.70835000 | 1.80306100                                                          |
| O                                    | 1.99783700  | -2.09065300 | 0.17223200                                                          |

|                                      |             |             |                                                                     |
|--------------------------------------|-------------|-------------|---------------------------------------------------------------------|
| N                                    | -1.16245000 | 2.58766800  | 0.30229300                                                          |
| N                                    | 3.99146800  | -0.14060800 | -0.52493300                                                         |
| C                                    | 0.46829000  | 1.27814400  | -0.52774700                                                         |
| C                                    | 1.80573600  | 0.81704400  | -1.01695300                                                         |
| C                                    | -0.72207800 | 0.48392800  | -0.36329600                                                         |
| C                                    | 2.71246300  | 0.20646600  | 0.07278700                                                          |
| C                                    | -1.72117300 | 1.33519400  | 0.15916300                                                          |
| C                                    | 0.14695500  | 2.54132300  | -0.11432000                                                         |
| C                                    | -1.02086800 | -0.86430200 | -0.61251100                                                         |
| C                                    | -3.00676900 | 0.87543100  | 0.43734400                                                          |
| C                                    | -2.29627200 | -1.31689200 | -0.33429200                                                         |
| C                                    | -3.28227100 | -0.45709800 | 0.18742700                                                          |
| C                                    | 1.99823600  | -0.99690600 | 0.67221500                                                          |
| H                                    | 2.36513800  | 1.64779600  | -1.45147700                                                         |
| H                                    | 1.67983200  | 0.06643200  | -1.80560800                                                         |
| H                                    | 2.86627200  | 0.94783000  | 0.85930600                                                          |
| H                                    | 0.76363700  | 3.42724800  | -0.08940300                                                         |
| H                                    | -1.63889400 | 3.40698500  | 0.63705400                                                          |
| H                                    | -0.28584800 | -1.55562600 | -1.00893300                                                         |
| H                                    | -3.77089300 | 1.53172900  | 0.83682300                                                          |
| H                                    | -4.27334000 | -0.84862700 | 0.39367800                                                          |
| H                                    | 3.85872200  | -0.92134500 | -1.16254400                                                         |
| H                                    | 4.64425500  | -0.45568600 | 0.18486100                                                          |
| H                                    | 0.82326600  | -1.48926300 | 2.04957700                                                          |
| H                                    | -3.48825400 | -2.81981400 | -0.38336000                                                         |
| <b>Stable Neutral form (3) - Gas</b> |             |             | <b>C<sub>11</sub>H<sub>12</sub>N<sub>2</sub>O<sub>3</sub> - Gas</b> |
| 0 1                                  |             |             |                                                                     |
| O                                    | -3.36190700 | -2.47456100 | -0.45600800                                                         |

|                                      |             |             |                                                                     |
|--------------------------------------|-------------|-------------|---------------------------------------------------------------------|
| O                                    | 1.65364600  | -0.59651200 | 1.63293000                                                          |
| O                                    | 3.67202000  | -1.37682300 | 1.21166700                                                          |
| N                                    | -1.01081000 | 2.41243900  | 0.31509800                                                          |
| N                                    | 3.90508800  | -0.26849700 | -1.20853200                                                         |
| C                                    | 0.31480600  | 0.83474200  | -0.59197000                                                         |
| C                                    | 1.49414600  | 0.13666100  | -1.20963800                                                         |
| C                                    | -0.99090400 | 0.26761500  | -0.35950500                                                         |
| C                                    | 2.79940700  | 0.18581600  | -0.38617400                                                         |
| C                                    | -1.79190200 | 1.28064500  | 0.21088200                                                          |
| C                                    | 0.24627000  | 2.13726900  | -0.16245400                                                         |
| C                                    | -1.53407500 | -1.00648100 | -0.58096700                                                         |
| C                                    | -3.11987900 | 1.05297200  | 0.57013900                                                          |
| C                                    | -2.84973700 | -1.22862400 | -0.22747800                                                         |
| C                                    | -3.63736900 | -0.20808100 | 0.34344900                                                          |
| C                                    | 2.75648400  | -0.68192800 | 0.87771300                                                          |
| H                                    | 1.72320300  | 0.57569700  | -2.18429400                                                         |
| H                                    | 1.25200700  | -0.91141700 | -1.40238200                                                         |
| H                                    | 2.93123700  | 1.21547200  | -0.01423300                                                         |
| H                                    | 1.00573200  | 2.90476700  | -0.16972100                                                         |
| H                                    | -1.30114500 | 3.28954300  | 0.71270000                                                          |
| H                                    | -0.95679200 | -1.81402400 | -1.01418000                                                         |
| H                                    | -3.73163500 | 1.83124000  | 1.01028000                                                          |
| H                                    | -4.66811600 | -0.42031500 | 0.60833700                                                          |
| H                                    | 4.63518200  | -0.66670200 | -0.62792400                                                         |
| H                                    | 4.29079300  | 0.48586400  | -1.76155500                                                         |
| H                                    | -4.26689700 | -2.51987900 | -0.13864300                                                         |
| H                                    | 0.99292900  | -0.01830700 | 1.22297400                                                          |
| <b>Stable Neutral form (4) - Gas</b> |             |             | <b>C<sub>11</sub>H<sub>12</sub>N<sub>2</sub>O<sub>3</sub> - Gas</b> |



|     |             |             |             |
|-----|-------------|-------------|-------------|
| 0 1 |             |             |             |
| O   | -2.70844700 | -2.63387400 | -0.59853900 |
| O   | 1.29582800  | -0.61867800 | 1.75109400  |
| O   | 2.43057200  | -2.07827900 | 0.54251000  |
| N   | -1.14719100 | 2.53815700  | 0.32079300  |
| N   | 4.02497800  | -0.19008300 | -0.55555000 |
| C   | 0.42707900  | 1.19160500  | -0.55824600 |
| C   | 1.72830400  | 0.68444700  | -1.10066200 |
| C   | -0.78450600 | 0.43125100  | -0.38084100 |
| C   | 2.74585500  | 0.23009500  | -0.02061300 |
| C   | -1.74762700 | 1.30433700  | 0.16763100  |
| C   | 0.15272900  | 2.46114200  | -0.11912000 |
| C   | -1.11577300 | -0.90780300 | -0.62943200 |
| C   | -3.04034300 | 0.87538000  | 0.46633000  |
| C   | -2.39781200 | -1.32885400 | -0.33870100 |
| C   | -3.35316400 | -0.44499900 | 0.20310900  |
| C   | 2.15892300  | -0.93623100 | 0.77393000  |
| H   | 2.21724800  | 1.46877800  | -1.68619600 |
| H   | 1.55200200  | -0.15735100 | -1.77776100 |
| H   | 2.89758500  | 1.07026200  | 0.66844200  |
| H   | 0.79009800  | 3.33287600  | -0.10510000 |
| H   | -1.59507000 | 3.36819700  | 0.66950600  |
| H   | -0.39739400 | -1.61852300 | -1.02142500 |
| H   | -3.77976700 | 1.54570700  | 0.88787900  |
| H   | -4.35131000 | -0.81243400 | 0.41874000  |
| H   | 4.26882300  | 0.33614900  | -1.38584800 |
| H   | -3.59444700 | -2.82760300 | -0.28372600 |
| H   | 1.07071200  | 0.31951500  | 1.70729900  |

| H                             | 3.99140100  | -1.17767200                                                         | -0.78933700 |
|-------------------------------|-------------|---------------------------------------------------------------------|-------------|
| Stable Neutral form (5) - Gas |             | C <sub>11</sub> H <sub>12</sub> N <sub>2</sub> O <sub>3</sub> - Gas |             |
| 0 1                           |             |                                                                     |             |
| O                             | -2.73595400 | -2.57057200                                                         | -0.55475100 |
| O                             | 1.64401500  | -0.53473200                                                         | 2.01760700  |
| O                             | 1.79940900  | -1.96679100                                                         | 0.30365900  |
| N                             | -1.04502500 | 2.57529800                                                          | 0.28770600  |
| N                             | 3.95346500  | -0.45724200                                                         | -0.49705400 |
| C                             | 0.47648000  | 1.19608100                                                          | -0.62941600 |
| C                             | 1.76625600  | 0.63978800                                                          | -1.14761100 |
| C                             | -0.73975600 | 0.45901300                                                          | -0.40682100 |
| C                             | 2.72995700  | 0.18144200                                                          | -0.02626100 |
| C                             | -1.66923700 | 1.35191600                                                          | 0.17025600  |
| C                             | 0.23962300  | 2.46974400                                                          | -0.18999500 |
| C                             | -1.11560700 | -0.86925900                                                         | -0.65407800 |
| C                             | -2.95919700 | 0.94952100                                                          | 0.51093100  |
| C                             | -2.39286300 | -1.26593400                                                         | -0.31178300 |
| C                             | -3.30883500 | -0.36652700                                                         | 0.26731600  |
| C                             | 2.01160300  | -0.77568800                                                         | 0.90485500  |
| H                             | 2.29627900  | 1.38463500                                                          | -1.74885200 |
| H                             | 1.56749100  | -0.21693600                                                         | -1.79942900 |
| H                             | 2.99575500  | 1.04293300                                                          | 0.58869000  |
| H                             | 0.89962100  | 3.32416200                                                          | -0.18035400 |
| H                             | -1.45437500 | 3.40671200                                                          | 0.67715300  |
| H                             | -0.43533000 | -1.58403200                                                         | -1.10108000 |
| H                             | -3.67000400 | 1.63626600                                                          | 0.95493100  |
| H                             | -4.30405700 | -0.71429900                                                         | 0.52530700  |
| H                             | 4.47090100  | 0.17544400                                                          | -1.09735700 |

|                                      |             |                                                                     |             |
|--------------------------------------|-------------|---------------------------------------------------------------------|-------------|
| H                                    | -3.64742900 | -2.71854000                                                         | -0.29224900 |
| H                                    | 3.72951600  | -1.28608200                                                         | -1.03910300 |
| H                                    | 1.30224200  | -2.52048700                                                         | 0.92129200  |
| <b>Stable Neutral form (6) - Gas</b> |             | <b>C<sub>11</sub>H<sub>12</sub>N<sub>2</sub>O<sub>3</sub> - Gas</b> |             |
| 0 1                                  |             |                                                                     |             |
| O                                    | -2.54768200 | -2.69017500                                                         | -0.56476900 |
| O                                    | 1.36095600  | -0.72117500                                                         | 1.82539600  |
| O                                    | 2.20481600  | -2.05966700                                                         | 0.25872200  |
| N                                    | -1.25641300 | 2.56685500                                                          | 0.29606500  |
| N                                    | 3.90660700  | -0.20066400                                                         | -0.55477600 |
| C                                    | 0.40468700  | 1.28044300                                                          | -0.49890300 |
| C                                    | 1.74028700  | 0.82893500                                                          | -0.99558400 |
| C                                    | -0.77026000 | 0.46497200                                                          | -0.34098000 |
| C                                    | 2.69051400  | 0.29434600                                                          | 0.09596000  |
| C                                    | -1.79074200 | 1.30190800                                                          | 0.15796800  |
| C                                    | 0.05832200  | 2.54219600                                                          | -0.10132600 |
| C                                    | -1.03359000 | -0.89111800                                                         | -0.57547000 |
| C                                    | -3.07108700 | 0.81947400                                                          | 0.42213100  |
| C                                    | -2.30410800 | -1.36563900                                                         | -0.31831000 |
| C                                    | -3.31614100 | -0.51892100                                                         | 0.17447300  |
| C                                    | 2.02060100  | -0.86459200                                                         | 0.84003500  |
| H                                    | 2.25296000  | 1.66089800                                                          | -1.49005700 |
| H                                    | 1.61152400  | 0.04367900                                                          | -1.74932000 |
| H                                    | 2.86369500  | 1.08255400                                                          | 0.83422400  |
| H                                    | 0.65676200  | 3.44057800                                                          | -0.07597800 |
| H                                    | -1.74600700 | 3.37508100                                                          | 0.63857900  |
| H                                    | -0.27084500 | -1.57822900                                                         | -0.92344400 |
| H                                    | -3.85352000 | 1.46275900                                                          | 0.80683300  |

|                     |             |                                                                                    |             |
|---------------------|-------------|------------------------------------------------------------------------------------|-------------|
| H                   | -4.30310800 | -0.92807700                                                                        | 0.36545400  |
| H                   | 4.68380200  | -0.25828900                                                                        | 0.09449500  |
| H                   | -3.42445500 | -2.92096700                                                                        | -0.24956500 |
| H                   | 4.18774400  | 0.40403100                                                                         | -1.31840400 |
| H                   | 2.87448600  | -1.93123700                                                                        | -0.43660300 |
| <b>Cation - Gas</b> |             | <b>[C<sub>11</sub>H<sub>12</sub>N<sub>2</sub>O<sub>3</sub>]<sup>++</sup> - Gas</b> |             |
| 12                  |             |                                                                                    |             |
| O                   | -2.88854600 | -2.50855000                                                                        | -0.61057800 |
| O                   | 3.09530800  | -1.15836200                                                                        | 1.66748800  |
| O                   | 1.36826900  | -1.65707600                                                                        | 0.33669900  |
| N                   | -1.19575000 | 2.46068000                                                                         | 0.49221600  |
| N                   | 3.95954000  | 0.05741500                                                                         | -0.88765700 |
| C                   | 0.35942000  | 1.17272100                                                                         | -0.51492300 |
| C                   | 1.63252800  | 0.71622600                                                                         | -1.15737300 |
| C                   | -0.87130400 | 0.41176400                                                                         | -0.32321000 |
| C                   | 2.72050300  | 0.29380400                                                                         | -0.16246900 |
| C                   | -1.81045700 | 1.28398700                                                                         | 0.31139300  |
| C                   | 0.10865500  | 2.40840600                                                                         | -0.00598700 |
| C                   | -1.24956800 | -0.86748600                                                                        | -0.62657700 |
| C                   | -3.12912200 | 0.88417200                                                                         | 0.64853600  |
| C                   | -2.58132200 | -1.26928300                                                                        | -0.29216100 |
| C                   | -3.50534200 | -0.39289900                                                                        | 0.34196500  |
| C                   | 2.28749800  | -0.93545100                                                                        | 0.62876200  |
| H                   | 2.05397700  | 1.52654400                                                                         | -1.75452500 |
| H                   | 1.42656700  | -0.11741000                                                                        | -1.83393200 |
| H                   | 2.90216800  | 1.10253100                                                                         | 0.55105800  |
| H                   | 0.73899800  | 3.28319000                                                                         | 0.03880700  |
| H                   | -1.61221400 | 3.27939200                                                                         | 0.91699400  |

|                                    |             |             |                                                                                   |
|------------------------------------|-------------|-------------|-----------------------------------------------------------------------------------|
| H                                  | -0.58140500 | -1.59109200 | -1.07606000                                                                       |
| H                                  | -3.81602800 | 1.56977400  | 1.13025200                                                                        |
| H                                  | -4.50160700 | -0.74918000 | 0.57687800                                                                        |
| H                                  | 3.88996700  | -0.75480600 | -1.49273400                                                                       |
| H                                  | 4.73967400  | -0.08424100 | -0.25602200                                                                       |
| H                                  | 2.83665000  | -1.98740400 | 2.09490700                                                                        |
| H                                  | -3.79244700 | -2.74783000 | -0.36414000                                                                       |
| <b>Radical Form (N4-H21) - Gas</b> |             |             | <b>[C<sub>11</sub>H<sub>11</sub>N<sub>2</sub>O<sub>3</sub>]<sup>•</sup> - Gas</b> |
| 0 2                                |             |             |                                                                                   |
| O                                  | -2.74007900 | -2.51812300 | -0.57943900                                                                       |
| O                                  | 1.36218800  | -0.56047100 | 1.84933800                                                                        |
| O                                  | 1.87521400  | -2.08428600 | 0.29109400                                                                        |
| N                                  | -1.04169800 | 2.66360000  | 0.33217500                                                                        |
| N                                  | 3.95989600  | -0.28737200 | -0.58535700                                                                       |
| C                                  | 0.49530200  | 1.21563100  | -0.57938400                                                                       |
| C                                  | 1.80197900  | 0.72342500  | -1.08658300                                                                       |
| C                                  | -0.72460600 | 0.47121400  | -0.39684500                                                                       |
| C                                  | 2.72079800  | 0.15472800  | 0.02460600                                                                        |
| C                                  | -1.63679200 | 1.39698500  | 0.16467900                                                                        |
| C                                  | 0.18703600  | 2.53662500  | -0.10096000                                                                       |
| C                                  | -1.09063600 | -0.84378300 | -0.64572900                                                                       |
| C                                  | -2.92195800 | 1.01506800  | 0.47569600                                                                        |
| C                                  | -2.40257700 | -1.22266800 | -0.32459500                                                                       |
| C                                  | -3.30128100 | -0.31239800 | 0.22487600                                                                        |
| C                                  | 1.96102500  | -0.96636200 | 0.72297200                                                                        |
| H                                  | 2.36027200  | 1.52792600  | -1.56979900                                                                       |
| H                                  | 1.64703900  | -0.07231300 | -1.82321300                                                                       |
| H                                  | 2.92902700  | 0.94213500  | 0.75155600                                                                        |

|                             |             |                                                                                   |             |
|-----------------------------|-------------|-----------------------------------------------------------------------------------|-------------|
| H                           | 0.87824600  | 3.37175900                                                                        | -0.09084100 |
| H                           | -0.41216500 | -1.57956500                                                                       | -1.06369700 |
| H                           | -3.62146000 | 1.72285700                                                                        | 0.90382200  |
| H                           | -4.30948500 | -0.63759500                                                                       | 0.46134100  |
| H                           | 3.78777600  | -1.12979100                                                                       | -1.12753500 |
| H                           | 4.64462500  | -0.52637100                                                                       | 0.12338700  |
| H                           | 0.81586100  | -1.28872500                                                                       | 2.17846500  |
| H                           | -3.65546900 | -2.67165900                                                                       | -0.33156600 |
| <b>Anion (N4-H21) - Gas</b> |             | <b>[C<sub>11</sub>H<sub>11</sub>N<sub>2</sub>O<sub>3</sub>]<sup>+</sup> - Gas</b> |             |
| -1 1                        |             |                                                                                   |             |
| O                           | -2.63995800 | -2.59622600                                                                       | -0.55386100 |
| O                           | 1.24387300  | -0.85770400                                                                       | 1.69239700  |
| O                           | 2.07315200  | -2.10166600                                                                       | 0.02760000  |
| N                           | -1.20406100 | 2.68027100                                                                        | 0.33665700  |
| N                           | 4.03084100  | -0.05781300                                                                       | -0.40743500 |
| C                           | 0.46039000  | 1.30155900                                                                        | -0.49612600 |
| C                           | 1.82345000  | 0.88235900                                                                        | -0.94326000 |
| C                           | -0.71026500 | 0.51536600                                                                        | -0.35897400 |
| C                           | 2.70589900  | 0.21695000                                                                        | 0.14328400  |
| C                           | -1.70327700 | 1.41893200                                                                        | 0.16385300  |
| C                           | 0.07585300  | 2.58050500                                                                        | -0.05831100 |
| C                           | -1.04225800 | -0.83737700                                                                       | -0.59860300 |
| C                           | -2.99311400 | 0.94959200                                                                        | 0.43089400  |
| C                           | -2.32431800 | -1.26081100                                                                       | -0.31758800 |
| C                           | -3.30120400 | -0.38391300                                                                       | 0.19614000  |
| C                           | 1.99580900  | -1.04292600                                                                       | 0.60127600  |
| H                           | 2.39504400  | 1.74705000                                                                        | -1.29495000 |
| H                           | 1.76464600  | 0.17256000                                                                        | -1.78108100 |

|                                    |             |                                                                                   |             |
|------------------------------------|-------------|-----------------------------------------------------------------------------------|-------------|
| H                                  | 2.79039400  | 0.90303300                                                                        | 0.98819100  |
| H                                  | 0.72654500  | 3.45221900                                                                        | -0.03188200 |
| H                                  | -0.32747100 | -1.55000600                                                                       | -1.00084400 |
| H                                  | -3.74080400 | 1.63037300                                                                        | 0.82594900  |
| H                                  | -4.29867200 | -0.76320800                                                                       | 0.40691800  |
| H                                  | 3.92094800  | -0.71870200                                                                       | -1.17235700 |
| H                                  | 4.60484400  | -0.52921000                                                                       | 0.28480800  |
| H                                  | 0.61511900  | -1.59147600                                                                       | 1.74538400  |
| H                                  | -3.57637800 | -2.70648600                                                                       | -0.37929100 |
| <b>Radical Form (O1-H27) - Gas</b> |             | <b>[C<sub>11</sub>H<sub>11</sub>N<sub>2</sub>O<sub>3</sub>]<sup>•</sup> - Gas</b> |             |
| 0 2                                |             |                                                                                   |             |
| O                                  | -2.60141800 | -2.64472200                                                                       | -0.59524200 |
| O                                  | 1.33684400  | -0.66717600                                                                       | 1.80495400  |
| O                                  | 2.03932400  | -2.05708600                                                                       | 0.19884200  |
| N                                  | -1.25538500 | 2.48926800                                                                        | 0.31483900  |
| N                                  | 3.97693100  | -0.06975300                                                                       | -0.53544200 |
| C                                  | 0.42408300  | 1.25591300                                                                        | -0.53303300 |
| C                                  | 1.77109500  | 0.83205600                                                                        | -1.02715700 |
| C                                  | -0.74992000 | 0.42005100                                                                        | -0.38060900 |
| C                                  | 2.69531200  | 0.25488700                                                                        | 0.06592500  |
| C                                  | -1.77515400 | 1.24260400                                                                        | 0.15701500  |
| C                                  | 0.06799700  | 2.49715600                                                                        | -0.10214400 |
| C                                  | -1.01452700 | -0.91361400                                                                       | -0.64511900 |
| C                                  | -3.07713800 | 0.76327800                                                                        | 0.44064600  |
| C                                  | -2.32903400 | -1.45008200                                                                       | -0.37068700 |
| C                                  | -3.33943100 | -0.54648300                                                                       | 0.18292100  |
| C                                  | 2.00966800  | -0.95759100                                                                       | 0.68221800  |
| H                                  | 2.30284600  | 1.67595200                                                                        | -1.47036700 |

|                             |             |             |                                                                                   |
|-----------------------------|-------------|-------------|-----------------------------------------------------------------------------------|
| H                           | 1.66063500  | 0.07210700  | -1.80855400                                                                       |
| H                           | 2.83677300  | 1.00904600  | 0.84267700                                                                        |
| H                           | 0.64967300  | 3.40506900  | -0.05938000                                                                       |
| H                           | -1.75592700 | 3.28796900  | 0.66834700                                                                        |
| H                           | -0.27294600 | -1.59338400 | -1.05130100                                                                       |
| H                           | -3.83302400 | 1.42525500  | 0.84845900                                                                        |
| H                           | -4.31343400 | -0.98060600 | 0.37321700                                                                        |
| H                           | 3.86578200  | -0.87834900 | -1.14157700                                                                       |
| H                           | 4.65089100  | -0.33103900 | 0.17604600                                                                        |
| H                           | 0.86220900  | -1.46579500 | 2.07835500                                                                        |
| <b>Anion (O1-H27) - Gas</b> |             |             | <b>[C<sub>11</sub>H<sub>11</sub>N<sub>2</sub>O<sub>3</sub>]<sup>+</sup> - Gas</b> |
| -1 1                        |             |             |                                                                                   |
| O                           | -2.54826300 | -2.71698700 | -0.55076500                                                                       |
| O                           | 1.13179600  | -0.86865400 | 1.60205000                                                                        |
| O                           | 2.21248500  | -2.09089300 | 0.06009200                                                                        |
| N                           | -1.27090600 | 2.55775200  | 0.32867100                                                                        |
| N                           | 4.00778700  | 0.06664700  | -0.35269200                                                                       |
| C                           | 0.40353000  | 1.30506700  | -0.49438400                                                                       |
| C                           | 1.77928800  | 0.90394400  | -0.92778300                                                                       |
| C                           | -0.76541300 | 0.45696700  | -0.36670800                                                                       |
| C                           | 2.66037700  | 0.26453900  | 0.17267600                                                                        |
| C                           | -1.79018900 | 1.27735500  | 0.13872000                                                                        |
| C                           | 0.03929000  | 2.56242300  | -0.08729900                                                                       |
| C                           | -0.99672400 | -0.90890100 | -0.60900800                                                                       |
| C                           | -3.06218900 | 0.75573500  | 0.41102600                                                                        |
| C                           | -2.27479500 | -1.49898000 | -0.35521500                                                                       |
| C                           | -3.28462600 | -0.58077600 | 0.16942100                                                                        |
| C                           | 1.99973500  | -1.03597700 | 0.59954200                                                                        |



|                               |             |                                                                           |             |
|-------------------------------|-------------|---------------------------------------------------------------------------|-------------|
| H                             | 2.33676100  | 1.77437400                                                                | -1.28553100 |
| H                             | 1.72057300  | 0.18934900                                                                | -1.75888700 |
| H                             | 2.69355100  | 0.94323000                                                                | 1.02787900  |
| H                             | 0.62992600  | 3.46695200                                                                | -0.05460000 |
| H                             | -1.82298200 | 3.38086400                                                                | 0.48953200  |
| H                             | -0.21988300 | -1.54972000                                                               | -1.01770800 |
| H                             | -3.85239700 | 1.38994800                                                                | 0.80639000  |
| H                             | -4.26029800 | -1.01610700                                                               | 0.36315400  |
| H                             | 3.95080000  | -0.62259500                                                               | -1.09891300 |
| H                             | 4.59147300  | -0.35894600                                                               | 0.36105900  |
| H                             | 0.45644300  | -1.56425200                                                               | 1.53882600  |
| <b>Inter1-N4-H21-HAT- Gas</b> |             | <b>C<sub>11</sub>H<sub>12</sub>N<sub>2</sub>O<sub>3</sub> + HOO'- Gas</b> |             |
| 0 2                           |             |                                                                           |             |
| O                             | -2.34757800 | -2.24702100                                                               | -1.54652000 |
| O                             | 1.24276700  | -1.10074900                                                               | 1.32136600  |
| O                             | 2.20624700  | -2.06427200                                                               | -0.45192700 |
| N                             | -0.97649700 | 2.71350000                                                                | 0.32796900  |
| N                             | 4.21676800  | -0.02376500                                                               | -0.37557200 |
| C                             | 0.72766700  | 1.48659900                                                                | -0.48275500 |
| C                             | 2.10778100  | 1.07547400                                                                | -0.89464500 |
| C                             | -0.49442800 | 0.73478000                                                                | -0.62931600 |
| C                             | 2.86447700  | 0.18290700                                                                | 0.11377400  |
| C                             | -1.53842400 | 1.53270000                                                                | -0.11017900 |
| C                             | 0.37831300  | 2.67597000                                                                | 0.09871900  |
| C                             | -0.78263000 | -0.54770900                                                               | -1.12357400 |
| C                             | -2.85799400 | 1.08268600                                                                | -0.06735300 |
| C                             | -2.08872300 | -0.99379200                                                               | -1.06865000 |
| C                             | -3.11961300 | -0.18448400                                                               | -0.54852900 |

|                            |             |                                                                           |             |
|----------------------------|-------------|---------------------------------------------------------------------------|-------------|
| C                          | 2.09597000  | -1.12006900                                                               | 0.27995400  |
| H                          | 2.73541800  | 1.95564900                                                                | -1.04681900 |
| H                          | 2.06969000  | 0.53983700                                                                | -1.85028700 |
| H                          | 2.90108200  | 0.69364100                                                                | 1.07840700  |
| H                          | 1.00440600  | 3.51654700                                                                | 0.35793200  |
| H                          | -1.47691200 | 3.48051100                                                                | 0.74320700  |
| H                          | -0.01682900 | -1.19990400                                                               | -1.52859200 |
| H                          | -3.65257500 | 1.69364200                                                                | 0.34369700  |
| H                          | -4.13292400 | -0.57134300                                                               | -0.52076800 |
| H                          | 4.18435200  | -0.60114700                                                               | -1.21179000 |
| H                          | 4.76951200  | -0.53418800                                                               | 0.30502600  |
| H                          | 0.67832400  | -1.89457500                                                               | 1.29382300  |
| H                          | -3.25070200 | -2.49470000                                                               | -1.33427800 |
| O                          | -1.35132500 | -1.61161200                                                               | 1.98701000  |
| O                          | -1.23449400 | -0.33852600                                                               | 2.24528100  |
| H                          | -0.37406900 | -0.06505200                                                               | 1.85730900  |
| <b>TS- N4-H21-HAT- Gas</b> |             | <b>C<sub>11</sub>H<sub>12</sub>N<sub>2</sub>O<sub>3</sub> + HOO'- Gas</b> |             |
| 0 2                        |             |                                                                           |             |
| O                          | 2.84861900  | 2.88026300                                                                | 0.24435100  |
| O                          | -1.20597400 | 0.24940700                                                                | 1.71745500  |
| O                          | -1.72114900 | 2.28200600                                                                | 0.94472700  |
| N                          | 0.92751300  | -2.15934500                                                               | -0.93100000 |
| N                          | -3.89007500 | 1.06696400                                                                | -0.51066500 |
| C                          | -0.51289500 | -0.41793600                                                               | -1.27353200 |
| C                          | -1.79273200 | 0.30908700                                                                | -1.50235600 |
| C                          | 0.73663600  | 0.14024900                                                                | -0.79218300 |
| C                          | -2.64749800 | 0.38151200                                                                | -0.21185400 |
| C                          | 1.58395800  | -0.96139200                                                               | -0.56749800 |

|             |    |             |             |             |       |       |      |         |       |       |  |
|-------------|----|-------------|-------------|-------------|-------|-------|------|---------|-------|-------|--|
| C           |    | -0.31874100 | -1.78802300 | -1.32966100 |       |       |      |         |       |       |  |
| C           |    | 1.16295900  | 1.43574100  | -0.52574400 |       |       |      |         |       |       |  |
| C           |    | 2.85280900  | -0.79494500 | -0.05053100 |       |       |      |         |       |       |  |
| C           |    | 2.45086700  | 1.60162600  | -0.00990200 |       |       |      |         |       |       |  |
| C           |    | 3.28052400  | 0.50443400  | 0.23122100  |       |       |      |         |       |       |  |
| C           |    | -1.83006600 | 1.09162500  | 0.86237000  |       |       |      |         |       |       |  |
| H           |    | -2.40606300 | -0.19346000 | -2.25189700 |       |       |      |         |       |       |  |
| H           |    | -1.60965200 | 1.33256900  | -1.84571800 |       |       |      |         |       |       |  |
| H           |    | -2.86068300 | -0.63708900 | 0.12058500  |       |       |      |         |       |       |  |
| H           |    | -1.04370300 | -2.53720300 | -1.61577000 |       |       |      |         |       |       |  |
| H           |    | 0.81270500  | -2.87925700 | 0.02778100  |       |       |      |         |       |       |  |
| H           |    | 0.54208200  | 2.30804500  | -0.69624300 |       |       |      |         |       |       |  |
| H           |    | 3.49739400  | -1.64488500 | 0.13781300  |       |       |      |         |       |       |  |
| H           |    | 4.27341800  | 0.66679100  | 0.63826900  |       |       |      |         |       |       |  |
| H           |    | -3.70704600 | 2.05511500  | -0.66137000 |       |       |      |         |       |       |  |
| H           |    | -4.53840200 | 0.99853600  | 0.26603500  |       |       |      |         |       |       |  |
| H           |    | -0.64350600 | 0.78606900  | 2.29628000  |       |       |      |         |       |       |  |
| H           |    | 3.75037400  | 2.88314000  | 0.57547600  |       |       |      |         |       |       |  |
| O           |    | 0.41140700  | -3.11450100 | 1.19207100  |       |       |      |         |       |       |  |
| O           |    | -0.87237400 | -2.64139800 | 1.21648500  |       |       |      |         |       |       |  |
| H           |    | -0.80815000 | -1.74979700 | 1.59771500  |       |       |      |         |       |       |  |
| Frequencies | -- | -2263.8431  |             | 35.1867     |       |       |      | 54.9330 |       |       |  |
| Red. masses | -- | 1.1221      |             | 6.7054      |       |       |      | 6.2430  |       |       |  |
| Frc consts  | -- | 3.3881      |             | 0.0049      |       |       |      | 0.0111  |       |       |  |
| IR Inten    | -- | 13593.4660  |             | 0.9610      |       |       |      | 0.1671  |       |       |  |
| Atom        | AN | X           | Y           | Z           | X     | Y     | Z    | X       | Y     | Z     |  |
| 1           | 8  | 0.00        | 0.00        | 0.00        | -0.05 | -0.09 | 0.19 | -0.19   | 0.05  | 0.04  |  |
| 2           | 8  | 0.00        | 0.00        | 0.00        | 0.11  | 0.25  | 0.02 | 0.26    | -0.01 | -0.11 |  |

|    |   |       |       |       |       |       |       |       |       |       |
|----|---|-------|-------|-------|-------|-------|-------|-------|-------|-------|
| 3  | 8 | 0.00  | 0.00  | 0.00  | -0.10 | 0.14  | -0.13 | 0.23  | 0.00  | -0.06 |
| 4  | 7 | -0.02 | 0.02  | -0.03 | 0.01  | -0.04 | -0.12 | 0.00  | -0.01 | 0.02  |
| 5  | 7 | 0.00  | 0.00  | 0.00  | -0.06 | -0.18 | 0.07  | 0.08  | 0.06  | 0.13  |
| 6  | 6 | 0.00  | 0.02  | 0.00  | -0.01 | -0.04 | -0.02 | -0.02 | -0.05 | -0.08 |
| 7  | 6 | 0.00  | 0.00  | 0.00  | -0.03 | -0.06 | 0.03  | -0.04 | -0.07 | -0.04 |
| 8  | 6 | 0.00  | 0.01  | 0.00  | -0.01 | -0.05 | 0.00  | -0.04 | -0.01 | -0.07 |
| 9  | 6 | 0.00  | 0.00  | 0.00  | 0.02  | -0.04 | 0.06  | 0.07  | 0.01  | 0.04  |
| 10 | 6 | 0.00  | 0.00  | 0.00  | 0.00  | -0.05 | -0.07 | -0.04 | 0.01  | 0.02  |
| 11 | 6 | 0.03  | -0.03 | 0.01  | 0.01  | -0.03 | -0.09 | 0.00  | -0.04 | -0.04 |
| 12 | 6 | -0.01 | 0.00  | 0.00  | -0.03 | -0.06 | 0.08  | -0.08 | 0.00  | -0.08 |
| 13 | 6 | -0.01 | 0.00  | 0.00  | 0.00  | -0.07 | -0.06 | -0.09 | 0.04  | 0.14  |
| 14 | 6 | 0.01  | 0.00  | 0.00  | -0.03 | -0.08 | 0.10  | -0.14 | 0.04  | 0.03  |
| 15 | 6 | 0.00  | 0.01  | 0.00  | -0.02 | -0.08 | 0.03  | -0.14 | 0.06  | 0.15  |
| 16 | 6 | 0.00  | 0.00  | 0.00  | 0.00  | 0.12  | -0.03 | 0.19  | 0.00  | -0.04 |
| 17 | 1 | 0.00  | -0.01 | 0.00  | -0.06 | -0.10 | 0.07  | -0.10 | -0.11 | 0.05  |
| 18 | 1 | 0.01  | 0.00  | 0.01  | -0.07 | -0.07 | -0.01 | -0.07 | -0.09 | -0.12 |
| 19 | 1 | 0.00  | 0.00  | 0.01  | 0.13  | -0.04 | 0.15  | 0.05  | 0.03  | 0.08  |
| 20 | 1 | 0.01  | 0.00  | 0.00  | 0.01  | -0.03 | -0.10 | 0.02  | -0.07 | -0.03 |
| 21 | 1 | -0.31 | -0.28 | 0.90  | 0.01  | -0.04 | -0.11 | -0.02 | -0.02 | 0.01  |
| 22 | 1 | 0.00  | 0.00  | 0.00  | -0.03 | -0.05 | 0.13  | -0.08 | -0.01 | -0.17 |
| 23 | 1 | -0.01 | 0.00  | 0.00  | 0.01  | -0.07 | -0.11 | -0.10 | 0.06  | 0.23  |
| 24 | 1 | 0.00  | 0.00  | 0.00  | -0.02 | -0.10 | 0.05  | -0.19 | 0.08  | 0.25  |
| 25 | 1 | 0.00  | 0.00  | 0.00  | -0.16 | -0.17 | 0.00  | 0.11  | 0.06  | 0.11  |
| 26 | 1 | 0.00  | -0.01 | 0.00  | -0.01 | -0.19 | 0.10  | 0.14  | 0.10  | 0.17  |
| 27 | 1 | -0.01 | 0.00  | 0.01  | 0.08  | 0.35  | -0.05 | 0.37  | -0.03 | -0.19 |
| 28 | 1 | 0.00  | 0.00  | 0.00  | -0.05 | -0.10 | 0.19  | -0.21 | 0.09  | 0.10  |
| 29 | 8 | 0.05  | -0.01 | -0.03 | 0.02  | 0.00  | -0.09 | -0.06 | -0.05 | -0.01 |
| 30 | 8 | -0.03 | 0.01  | 0.00  | 0.12  | 0.27  | 0.00  | -0.06 | -0.05 | -0.03 |

|                                              |   |                             |       |                |      |                                                                           |      |       |       |       |
|----------------------------------------------|---|-----------------------------|-------|----------------|------|---------------------------------------------------------------------------|------|-------|-------|-------|
| 31                                           | 1 | 0.01                        | -0.03 | 0.00           | 0.32 | 0.25                                                                      | 0.01 | -0.06 | -0.05 | -0.03 |
| Zero-point correction=                       |   | 0.236810 (Hartree/Particle) |       |                |      |                                                                           |      |       |       |       |
| Thermal correction to Energy=                |   | 0.253802                    |       |                |      |                                                                           |      |       |       |       |
| Thermal correction to Enthalpy=              |   | 0.254747                    |       |                |      |                                                                           |      |       |       |       |
| Thermal correction to Gibbs Free Energy=     |   | 0.191158                    |       |                |      |                                                                           |      |       |       |       |
| Sum of electronic and zero-point Energies=   |   | -912.145357                 |       |                |      |                                                                           |      |       |       |       |
| Sum of electronic and thermal Energies=      |   | -912.128364                 |       |                |      |                                                                           |      |       |       |       |
| Sum of electronic and thermal Enthalpies=    |   | -912.127420                 |       |                |      |                                                                           |      |       |       |       |
| Sum of electronic and thermal Free Energies= |   | -912.191008                 |       |                |      |                                                                           |      |       |       |       |
|                                              |   | E (Thermal)                 |       | CV             |      | S                                                                         |      |       |       |       |
|                                              |   | KCal/Mol                    |       | Cal/Mol-Kelvin |      | Cal/Mol-Kelvin                                                            |      |       |       |       |
| Total                                        |   | 159.263                     |       | 64.372         |      | 133.833                                                                   |      |       |       |       |
| Electronic                                   |   | 0.000                       |       | 0.000          |      | 1.377                                                                     |      |       |       |       |
| Translational                                |   | 0.889                       |       | 2.981          |      | 42.486                                                                    |      |       |       |       |
| Rotational                                   |   | 0.889                       |       | 2.981          |      | 33.010                                                                    |      |       |       |       |
| Vibrational                                  |   | 157.486                     |       | 58.410         |      | 56.960                                                                    |      |       |       |       |
| HF=-912.3821663                              |   |                             |       |                |      |                                                                           |      |       |       |       |
| <b>Inter2-N4-H21-HAT- Gas</b>                |   |                             |       |                |      | <b>C<sub>11</sub>H<sub>12</sub>N<sub>2</sub>O<sub>3</sub> + HOO•- Gas</b> |      |       |       |       |
| 0 2                                          |   |                             |       |                |      |                                                                           |      |       |       |       |
| O                                            |   | -2.96858800                 |       | -2.72657400    |      | 0.35701200                                                                |      |       |       |       |
| O                                            |   | 1.18930400                  |       | -0.57582600    |      | 1.72547200                                                                |      |       |       |       |
| O                                            |   | 1.71349800                  |       | -2.46726300    |      | 0.65872800                                                                |      |       |       |       |
| N                                            |   | -0.95535500                 |       | 2.24470200     |      | -1.00372400                                                               |      |       |       |       |
| N                                            |   | 3.85428800                  |       | -0.97693100    |      | -0.59368400                                                               |      |       |       |       |
| C                                            |   | 0.43773500                  |       | 0.43865500     |      | -1.30508800                                                               |      |       |       |       |
| C                                            |   | 1.71797400                  |       | -0.27598300    |      | -1.53314500                                                               |      |       |       |       |
| C                                            |   | -0.80078100                 |       | -0.07444600    |      | -0.78969800                                                               |      |       |       |       |
| C                                            |   | 2.56887200                  |       | -0.40365800    |      | -0.24143000                                                               |      |       |       |       |

|                               |             |                                                                           |             |
|-------------------------------|-------------|---------------------------------------------------------------------------|-------------|
| C                             | -1.62496200 | 1.06239400                                                                | -0.61116900 |
| C                             | 0.22487300  | 1.86358100                                                                | -1.41062600 |
| C                             | -1.25179300 | -1.35013100                                                               | -0.46708700 |
| C                             | -2.89822100 | 0.93671600                                                                | -0.10421700 |
| C                             | -2.54924500 | -1.46808800                                                               | 0.04523700  |
| C                             | -3.35710300 | -0.34660000                                                               | 0.22572300  |
| C                             | 1.79714400  | -1.27388100                                                               | 0.74516100  |
| H                             | 2.33806200  | 0.26145500                                                                | -2.25273500 |
| H                             | 1.53989400  | -1.28585900                                                               | -1.91801200 |
| H                             | 2.71373500  | 0.59018500                                                                | 0.18709800  |
| H                             | 0.96840100  | 2.57659700                                                                | -1.74737200 |
| H                             | -0.37249500 | 3.17299400                                                                | 0.70021700  |
| H                             | -0.64636100 | -2.24135100                                                               | -0.59169000 |
| H                             | -3.52814000 | 1.80626600                                                                | 0.03788100  |
| H                             | -4.35775100 | -0.47217800                                                               | 0.62680000  |
| H                             | 3.74110200  | -1.96068600                                                               | -0.82241700 |
| H                             | 4.50225900  | -0.91916700                                                               | 0.18411200  |
| H                             | 0.66772600  | -1.19852000                                                               | 2.25385300  |
| H                             | -3.87716000 | -2.70266400                                                               | 0.66868600  |
| O                             | 0.08651000  | 3.16155400                                                                | 1.55958000  |
| O                             | 1.17213800  | 2.28195800                                                                | 1.30125300  |
| H                             | 0.88835600  | 1.45638700                                                                | 1.71710400  |
| <b>Inter1-O1-H27-HAT- Gas</b> |             | <b>C<sub>11</sub>H<sub>12</sub>N<sub>2</sub>O<sub>3</sub> + HOO•- Gas</b> |             |
| 0 2                           |             |                                                                           |             |
| O                             | -2.59698900 | -1.13895300                                                               | -0.51722000 |
| O                             | 1.76134800  | -1.04505000                                                               | 1.79393600  |
| O                             | 1.78680100  | -2.60674900                                                               | 0.19225100  |
| N                             | 0.91548400  | 2.99423600                                                                | 0.27179900  |

|                           |             |             |                                                                           |
|---------------------------|-------------|-------------|---------------------------------------------------------------------------|
| N                         | 4.40582600  | -1.68180500 | -0.53047100                                                               |
| C                         | 1.82141900  | 1.10280900  | -0.54245800                                                               |
| C                         | 2.82901400  | 0.10847100  | -1.02876600                                                               |
| C                         | 0.40727900  | 0.89505000  | -0.36088600                                                               |
| C                         | 3.39665100  | -0.82097100 | 0.06548000                                                                |
| C                         | -0.12653600 | 2.09773300  | 0.15103500                                                                |
| C                         | 2.07534900  | 2.38765200  | -0.14895800                                                               |
| C                         | -0.44131500 | -0.20009900 | -0.58553300                                                               |
| C                         | -1.48274500 | 2.23335800  | 0.44261500                                                                |
| C                         | -1.78655600 | -0.06511700 | -0.29495400                                                               |
| C                         | -2.30394200 | 1.14346400  | 0.21697600                                                                |
| C                         | 2.24276900  | -1.60425700 | 0.67539400                                                                |
| H                         | 3.68704200  | 0.61538100  | -1.47479700                                                               |
| H                         | 2.38815100  | -0.52415300 | -1.80778300                                                               |
| H                         | 3.85313700  | -0.20830300 | 0.84537100                                                                |
| H                         | 3.01173600  | 2.92520900  | -0.14096000                                                               |
| H                         | 0.83757800  | 3.94306100  | 0.59377400                                                                |
| H                         | -0.07575100 | -1.14420600 | -0.97371700                                                               |
| H                         | -1.88863300 | 3.15866300  | 0.83472000                                                                |
| H                         | -3.36464600 | 1.21308700  | 0.43323300                                                                |
| H                         | 3.95078400  | -2.33492600 | -1.16307000                                                               |
| H                         | 4.86143200  | -2.24269700 | 0.18170600                                                                |
| H                         | 0.95642800  | -1.52387500 | 2.03876200                                                                |
| H                         | -3.50934200 | -0.91114800 | -0.30189600                                                               |
| O                         | -5.42112600 | -0.48119400 | 0.11559200                                                                |
| O                         | -6.11736300 | -1.54080800 | -0.18467700                                                               |
| H                         | -7.04677900 | -1.31963900 | 0.00663600                                                                |
| <b>TS-O1-H27-HAT- Gas</b> |             |             | <b>C<sub>11</sub>H<sub>12</sub>N<sub>2</sub>O<sub>3</sub> + HOO'- Gas</b> |

|     |             |             |             |
|-----|-------------|-------------|-------------|
| 0 2 |             |             |             |
| O   | -2.64752600 | -1.23065300 | 0.18662500  |
| O   | 1.94040400  | -0.88940100 | 1.84027500  |
| O   | 1.79921000  | -2.52675300 | 0.32241700  |
| N   | 0.73358500  | 3.00820400  | 0.09497100  |
| N   | 4.31035500  | -1.59521300 | -0.73119200 |
| C   | 1.63136900  | 1.08995300  | -0.66668600 |
| C   | 2.61667100  | 0.09272600  | -1.18988800 |
| C   | 0.25612900  | 0.85010900  | -0.29078300 |
| C   | 3.33643900  | -0.72358100 | -0.09561800 |
| C   | -0.26557200 | 2.08082700  | 0.18522200  |
| C   | 1.86963600  | 2.40900400  | -0.41785200 |
| C   | -0.56792400 | -0.27118300 | -0.32777500 |
| C   | -1.58582300 | 2.21249200  | 0.64372300  |
| C   | -1.88271300 | -0.15989600 | 0.15528400  |
| C   | -2.37826100 | 1.09223300  | 0.63663500  |
| C   | 2.28838300  | -1.49420600 | 0.69619000  |
| H   | 3.39787500  | 0.59173400  | -1.76640900 |
| H   | 2.11908200  | -0.61413900 | -1.86334200 |
| H   | 3.84899900  | -0.03500000 | 0.57911600  |
| H   | 2.77084000  | 2.98274800  | -0.57134700 |
| H   | 0.65483500  | 3.97698500  | 0.35493700  |
| H   | -0.22929400 | -1.23447600 | -0.69310200 |
| H   | -1.96362300 | 3.16338100  | 1.00089000  |
| H   | -3.40273900 | 1.12952200  | 0.98695500  |
| H   | 3.82183000  | -2.32442700 | -1.24426300 |
| H   | 4.88104500  | -2.06252200 | -0.03497300 |
| H   | 1.20831700  | -1.39059100 | 2.22812500  |



|             |    |             |             |             |         |       |       |         |       |       |  |
|-------------|----|-------------|-------------|-------------|---------|-------|-------|---------|-------|-------|--|
| H           |    | -3.67763400 | -0.96429700 | -0.11189300 |         |       |       |         |       |       |  |
| O           |    | -4.73974400 | -0.61469100 | -0.69896800 |         |       |       |         |       |       |  |
| O           |    | -5.68608700 | -1.52093800 | -0.30604900 |         |       |       |         |       |       |  |
| H           |    | -5.97716000 | -1.92123300 | -1.13626100 |         |       |       |         |       |       |  |
| Frequencies | -- | -2423.9109  |             |             | 27.6603 |       |       | 38.1921 |       |       |  |
| Red. masses | -- | 1.2024      |             |             | 6.5793  |       |       | 7.2412  |       |       |  |
| Frc consts  | -- | 4.1621      |             |             | 0.0030  |       |       | 0.0062  |       |       |  |
| IR Inten    | -- | 86632.7749  |             |             | 0.3312  |       |       | 0.8563  |       |       |  |
| Atom        | AN | X           | Y           | Z           | X       | Y     | Z     | X       | Y     | Z     |  |
| 1           | 8  | -0.04       | -0.03       | -0.01       | -0.05   | -0.02 | -0.03 | -0.01   | 0.10  | 0.28  |  |
| 2           | 8  | 0.00        | 0.00        | 0.00        | 0.24    | 0.24  | 0.06  | -0.03   | -0.08 | -0.02 |  |
| 3           | 8  | 0.00        | 0.00        | 0.00        | -0.01   | 0.11  | 0.23  | -0.07   | -0.05 | -0.05 |  |
| 4           | 7  | 0.01        | 0.01        | 0.00        | 0.01    | -0.06 | 0.08  | 0.02    | 0.07  | -0.08 |  |
| 5           | 7  | 0.00        | 0.00        | 0.00        | -0.11   | -0.11 | -0.19 | -0.08   | -0.05 | -0.07 |  |
| 6           | 6  | -0.01       | 0.00        | 0.00        | -0.03   | -0.04 | -0.02 | -0.02   | 0.01  | 0.00  |  |
| 7           | 6  | 0.00        | 0.00        | 0.00        | -0.07   | -0.05 | -0.08 | -0.06   | -0.02 | -0.01 |  |
| 8           | 6  | 0.00        | 0.01        | 0.00        | -0.02   | -0.04 | 0.02  | -0.01   | 0.05  | 0.07  |  |
| 9           | 6  | 0.00        | 0.00        | 0.00        | 0.03    | -0.01 | -0.12 | -0.06   | -0.05 | -0.04 |  |
| 10          | 6  | -0.01       | -0.01       | 0.00        | 0.00    | -0.06 | 0.08  | 0.02    | 0.08  | 0.01  |  |
| 11          | 6  | 0.00        | 0.01        | 0.00        | -0.02   | -0.05 | 0.02  | 0.00    | 0.03  | -0.09 |  |
| 12          | 6  | -0.02       | 0.00        | 0.01        | -0.03   | -0.04 | 0.00  | -0.02   | 0.05  | 0.17  |  |
| 13          | 6  | 0.01        | 0.00        | 0.00        | 0.01    | -0.06 | 0.11  | 0.03    | 0.12  | 0.04  |  |
| 14          | 6  | 0.04        | 0.05        | -0.01       | -0.03   | -0.04 | 0.02  | 0.00    | 0.09  | 0.20  |  |
| 15          | 6  | 0.00        | -0.02       | -0.01       | 0.00    | -0.05 | 0.07  | 0.02    | 0.13  | 0.12  |  |
| 16          | 6  | 0.00        | 0.00        | 0.00        | 0.08    | 0.12  | 0.08  | -0.05   | -0.06 | -0.03 |  |
| 17          | 1  | 0.00        | 0.00        | 0.00        | -0.13   | -0.06 | -0.17 | -0.06   | -0.04 | -0.03 |  |
| 18          | 1  | 0.00        | 0.00        | 0.00        | -0.14   | -0.07 | -0.01 | -0.10   | 0.00  | -0.01 |  |
| 19          | 1  | 0.00        | 0.00        | 0.00        | 0.16    | 0.01  | -0.24 | -0.04   | -0.07 | -0.03 |  |

|    |   |       |       |       |       |       |       |       |       |       |
|----|---|-------|-------|-------|-------|-------|-------|-------|-------|-------|
| 20 | 1 | 0.00  | 0.00  | 0.00  | -0.02 | -0.05 | 0.01  | 0.00  | 0.01  | -0.16 |
| 21 | 1 | 0.01  | 0.00  | 0.00  | 0.02  | -0.07 | 0.11  | 0.04  | 0.08  | -0.13 |
| 22 | 1 | -0.01 | 0.00  | 0.00  | -0.04 | -0.03 | -0.03 | -0.04 | 0.03  | 0.21  |
| 23 | 1 | 0.00  | 0.00  | 0.00  | 0.03  | -0.07 | 0.15  | 0.05  | 0.15  | -0.01 |
| 24 | 1 | 0.01  | 0.01  | 0.02  | 0.00  | -0.05 | 0.09  | 0.03  | 0.16  | 0.15  |
| 25 | 1 | 0.00  | 0.00  | 0.00  | -0.23 | -0.12 | -0.06 | -0.10 | -0.03 | -0.08 |
| 26 | 1 | 0.00  | 0.00  | 0.00  | -0.04 | -0.09 | -0.23 | -0.08 | -0.08 | -0.09 |
| 27 | 1 | -0.01 | 0.01  | -0.01 | 0.26  | 0.31  | 0.19  | -0.03 | -0.08 | -0.01 |
| 28 | 1 | 0.88  | -0.17 | 0.43  | -0.03 | 0.00  | -0.07 | 0.03  | 0.03  | 0.09  |
| 29 | 8 | -0.06 | -0.02 | -0.01 | 0.01  | 0.03  | -0.12 | 0.13  | -0.13 | -0.15 |
| 30 | 8 | 0.03  | 0.03  | -0.01 | -0.03 | 0.05  | -0.17 | 0.13  | -0.18 | -0.24 |
| 31 | 1 | -0.03 | 0.00  | -0.02 | 0.01  | 0.05  | -0.18 | 0.35  | -0.31 | -0.25 |

Zero-point correction= 0.236686 (Hartree/Particle)

Thermal correction to Energy= 0.254090

Thermal correction to Enthalpy= 0.255034

Thermal correction to Gibbs Free Energy= 0.188996

Sum of electronic and zero-point Energies= -912.148420

Sum of electronic and thermal Energies= -912.131016

Sum of electronic and thermal Enthalpies= -912.130072

Sum of electronic and thermal Free Energies= -912.196111

|               | E (Thermal) | CV             | S              |
|---------------|-------------|----------------|----------------|
|               | KCal/Mol    | Cal/Mol-Kelvin | Cal/Mol-Kelvin |
| Total         | 159.444     | 64.501         | 138.990        |
| Electronic    | 0.000       | 0.000          | 1.377          |
| Translational | 0.889       | 2.981          | 42.486         |
| Rotational    | 0.889       | 2.981          | 33.679         |
| Vibrational   | 157.666     | 58.539         | 61.447         |

HF = -912.3851065

|     | Inter2-O1-H27-HAT- Gas |             | C <sub>11</sub> H <sub>12</sub> N <sub>2</sub> O <sub>3</sub> + HOO•- Gas |
|-----|------------------------|-------------|---------------------------------------------------------------------------|
| 0 2 |                        |             |                                                                           |
| O   | -2.52892000            | -1.34420600 | -0.84340300                                                               |
| O   | 1.76260100             | -1.00850800 | 1.81683700                                                                |
| O   | 1.92472100             | -2.47827600 | 0.13780600                                                                |
| N   | 0.52154800             | 2.92020000  | 0.35641900                                                                |
| N   | 4.50691900             | -1.33927300 | -0.44173800                                                               |
| C   | 1.68413200             | 1.19076500  | -0.49310900                                                               |
| C   | 2.80856200             | 0.32259800  | -0.96211700                                                               |
| C   | 0.28165600             | 0.83107300  | -0.41325200                                                               |
| C   | 3.40881000             | -0.58293700 | 0.13425700                                                                |
| C   | -0.40325600            | 1.95299600  | 0.12965200                                                                |
| C   | 1.77824800             | 2.46246400  | -0.01979300                                                               |
| C   | -0.43374000            | -0.30368700 | -0.74738300                                                               |
| C   | -1.80166800            | 1.96575800  | 0.35601600                                                                |
| C   | -1.86206800            | -0.32897700 | -0.53772100                                                               |
| C   | -2.50980200            | 0.85078600  | 0.03237000                                                                |
| C   | 2.30117200             | -1.47464600 | 0.68083300                                                                |
| H   | 3.62932200             | 0.92918100  | -1.34850400                                                               |
| H   | 2.46798300             | -0.32142400 | -1.78012800                                                               |
| H   | 3.78384300             | 0.04433000  | 0.94522200                                                                |
| H   | 2.64411500             | 3.09816600  | 0.08221900                                                                |
| H   | 0.32621100             | 3.83499700  | 0.72975300                                                                |
| H   | 0.02770600             | -1.19257300 | -1.16340000                                                               |
| H   | -2.28599600            | 2.83894500  | 0.77813200                                                                |
| H   | -3.57891500            | 0.78926700  | 0.19715600                                                                |
| H   | 4.13577100             | -2.02876800 | -1.09021200                                                               |
| H   | 5.00550700             | -1.85316700 | 0.27673200                                                                |

|                                |             |                                                                                   |             |
|--------------------------------|-------------|-----------------------------------------------------------------------------------|-------------|
| H                              | 1.01854300  | -1.58361100                                                                       | 2.04801100  |
| H                              | -4.29483100 | -1.28049600                                                                       | -0.73480200 |
| O                              | -5.24136100 | -1.11927100                                                                       | -0.53463700 |
| O                              | -5.17820300 | -0.80499900                                                                       | 0.85323100  |
| H                              | -5.50150900 | -1.61642400                                                                       | 1.25986400  |
| <b>Anion (Adiabatic) - Gas</b> |             | <b>[C<sub>11</sub>H<sub>12</sub>N<sub>2</sub>O<sub>3</sub>]<sup>-</sup> - Gas</b> |             |
| -1 2                           |             |                                                                                   |             |
| O                              | -2.61403800 | -2.62831600                                                                       | -0.59570500 |
| O                              | 1.24255600  | -0.78800500                                                                       | 1.67159500  |
| O                              | 2.18656000  | -2.16653800                                                                       | 0.18711200  |
| N                              | -1.16666300 | 2.58404300                                                                        | 0.32090600  |
| N                              | 3.98685900  | -0.13416200                                                                       | -0.50466900 |
| C                              | 0.45611100  | 1.27304400                                                                        | -0.51638500 |
| C                              | 1.79588500  | 0.81510800                                                                        | -0.99573000 |
| C                              | -0.73492900 | 0.48530800                                                                        | -0.36707700 |
| C                              | 2.70111400  | 0.19914500                                                                        | 0.09769700  |
| C                              | -1.72984100 | 1.34058200                                                                        | 0.16794300  |
| C                              | 0.13770700  | 2.53475000                                                                        | -0.08233200 |
| C                              | -1.04520800 | -0.86100300                                                                       | -0.62464100 |
| C                              | -3.01571500 | 0.88593000                                                                        | 0.44883900  |
| C                              | -2.32181500 | -1.30436600                                                                       | -0.34166800 |
| C                              | -3.30143400 | -0.44407300                                                                       | 0.18916600  |
| C                              | 2.04601800  | -1.05696900                                                                       | 0.62998300  |
| H                              | 2.34831900  | 1.66691400                                                                        | -1.40657400 |
| H                              | 1.70394700  | 0.07511000                                                                        | -1.79658800 |
| H                              | 2.76260100  | 0.91393500                                                                        | 0.92823300  |
| H                              | 0.75667000  | 3.41905800                                                                        | -0.02986200 |
| H                              | -1.61629700 | 3.39927200                                                                        | 0.72032700  |

|                               |             |                                                                                   |             |
|-------------------------------|-------------|-----------------------------------------------------------------------------------|-------------|
| H                             | -0.31523800 | -1.55319900                                                                       | -1.03128600 |
| H                             | -3.76768400 | 1.55003400                                                                        | 0.85811800  |
| H                             | -4.29384000 | -0.83296800                                                                       | 0.39831200  |
| H                             | 4.55251800  | -0.68797900                                                                       | 0.12953800  |
| H                             | 4.49294000  | 0.72629800                                                                        | -0.69172400 |
| H                             | 0.72316400  | -1.58342400                                                                       | 1.85134100  |
| H                             | -3.53644500 | -2.78408200                                                                       | -0.38227800 |
| <b>Anion (Vertical) - Gas</b> |             | <b>[C<sub>11</sub>H<sub>12</sub>N<sub>2</sub>O<sub>3</sub>]<sup>-</sup> - Gas</b> |             |
| -1 2                          |             |                                                                                   |             |
| O                             | -2.56738500 | -2.63613100                                                                       | -0.58284400 |
| O                             | 1.33948500  | -0.70835000                                                                       | 1.80306100  |
| O                             | 1.99783700  | -2.09065300                                                                       | 0.17223200  |
| N                             | -1.16245000 | 2.58766800                                                                        | 0.30229300  |
| N                             | 3.99146800  | -0.14060800                                                                       | -0.52493300 |
| C                             | 0.46829000  | 1.27814400                                                                        | -0.52774700 |
| C                             | 1.80573600  | 0.81704400                                                                        | -1.01695300 |
| C                             | -0.72207800 | 0.48392800                                                                        | -0.36329600 |
| C                             | 2.71246300  | 0.20646600                                                                        | 0.07278700  |
| C                             | -1.72117300 | 1.33519400                                                                        | 0.15916300  |
| C                             | 0.14695500  | 2.54132300                                                                        | -0.11432000 |
| C                             | -1.02086800 | -0.86430200                                                                       | -0.61251100 |
| C                             | -3.00676900 | 0.87543100                                                                        | 0.43734400  |
| C                             | -2.29627200 | -1.31689200                                                                       | -0.33429200 |
| C                             | -3.28227100 | -0.45709800                                                                       | 0.18742700  |
| C                             | 1.99823600  | -0.99690600                                                                       | 0.67221500  |
| H                             | 2.36513800  | 1.64779600                                                                        | -1.45147700 |
| H                             | 1.67983200  | 0.06643200                                                                        | -1.80560800 |
| H                             | 2.86627200  | 0.94783000                                                                        | 0.85930600  |

|                                |             |             |                                                                                   |
|--------------------------------|-------------|-------------|-----------------------------------------------------------------------------------|
| H                              | 0.76363700  | 3.42724800  | -0.08940300                                                                       |
| H                              | -1.63889400 | 3.40698500  | 0.63705400                                                                        |
| H                              | -0.28584800 | -1.55562600 | -1.00893300                                                                       |
| H                              | -3.77089300 | 1.53172900  | 0.83682300                                                                        |
| H                              | -4.27334000 | -0.84862700 | 0.39367800                                                                        |
| H                              | 3.85872200  | -0.92134500 | -1.16254400                                                                       |
| H                              | 4.64425500  | -0.45568600 | 0.18486100                                                                        |
| H                              | 0.82326600  | -1.48926300 | 2.04957700                                                                        |
| H                              | -3.48825400 | -2.81981400 | -0.38336000                                                                       |
| <b>Cation (Vertical) - Gas</b> |             |             | <b>[C<sub>11</sub>H<sub>12</sub>N<sub>2</sub>O<sub>3</sub>]<sup>+</sup> - Gas</b> |
| 12                             |             |             |                                                                                   |
| O                              | 1.23528100  | -0.80156600 | 1.73240700                                                                        |
| O                              | 2.13408500  | -1.92839500 | 0.02188000                                                                        |
| N                              | -1.76930300 | 2.05065200  | 0.43675500                                                                        |
| N                              | 3.80233900  | 0.36589200  | -0.46254100                                                                       |
| C                              | 0.09017900  | 1.16363000  | -0.46594900                                                                       |
| C                              | 1.49930900  | 0.99986900  | -0.94383800                                                                       |
| C                              | -0.93682200 | 0.15279900  | -0.42722000                                                                       |
| C                              | 2.47426800  | 0.45435800  | 0.12127200                                                                        |
| C                              | -2.08441000 | 0.74408600  | 0.14700300                                                                        |
| C                              | -0.46426000 | 2.29321800  | 0.06537500                                                                        |
| C                              | -0.99009700 | -1.19331400 | -0.82312300                                                                       |
| C                              | -3.27292800 | 0.03575500  | 0.33862600                                                                        |
| C                              | -2.16408100 | -1.89877600 | -0.63302800                                                                       |
| C                              | -3.29483600 | -1.28918500 | -0.05647800                                                                       |
| C                              | 1.95146600  | -0.89167600 | 0.60397000                                                                        |
| H                              | 1.90962500  | 1.95434400  | -1.27945800                                                                       |
| H                              | 1.52812000  | 0.31831600  | -1.80161100                                                                       |

|   |             |             |             |
|---|-------------|-------------|-------------|
| H | 2.49249400  | 1.14294400  | 0.96847100  |
| H | -0.02470800 | 3.26920300  | 0.20729500  |
| H | -2.39369200 | 2.72536800  | 0.84388700  |
| H | -0.12339400 | -1.67484000 | -1.26299900 |
| H | -4.14439500 | 0.50497300  | 0.78037000  |
| H | -4.20063000 | -1.86830400 | 0.07761900  |
| H | 3.81069600  | -0.37484200 | -1.15863900 |
| H | 4.48705100  | 0.11025800  | 0.24075700  |
| H | 0.84560800  | -1.67043500 | 1.90599100  |
| H | -2.21968800 | -2.93767900 | -0.93513700 |

**Table S4.** Optimized structures of LP forms in water using M06-2X/6-311++g(d,p)

|   | Stable Neutral form - Water |             | $C_{11}H_{12}N_2O_2$ - Water |  |
|---|-----------------------------|-------------|------------------------------|--|
| 0 |                             |             |                              |  |
| 1 |                             |             |                              |  |
| O | 1.33267600                  | -0.89124100 | 1.78425000                   |  |
| O | 2.39766200                  | -1.85467400 | 0.04804800                   |  |
| N | -1.87172300                 | 2.02177800  | 0.42903900                   |  |
| N | 3.73526000                  | 0.30268900  | -0.48735500                  |  |
| C | 0.01289400                  | 1.13579500  | -0.41486900                  |  |
| C | 1.41692900                  | 0.98174700  | -0.90951000                  |  |
| C | -1.00221000                 | 0.11638200  | -0.38315200                  |  |
| C | 2.39793300                  | 0.50180200  | 0.16896400                   |  |
| C | -2.17046400                 | 0.70985500  | 0.14972700                   |  |
| C | -0.56428100                 | 2.27184600  | 0.08378800                   |  |
| C | -1.02938400                 | -1.23649600 | -0.75725900                  |  |
| C | -3.36094500                 | -0.00633900 | 0.31428200                   |  |
| C | -2.20504500                 | -1.94812900 | -0.59784600                  |  |
| C | -3.36016600                 | -1.33690400 | -0.06669100                  |  |

|                       |             |                                                                                      |             |
|-----------------------|-------------|--------------------------------------------------------------------------------------|-------------|
| C                     | 1.99872700  | -0.88861000                                                                          | 0.74166500  |
| H                     | 1.77403100  | 1.93759200                                                                           | -1.30420700 |
| H                     | 1.43653100  | 0.25891900                                                                           | -1.73306500 |
| H                     | 2.50785400  | 1.23955600                                                                           | 0.96109700  |
| H                     | -0.14147300 | 3.25640100                                                                           | 0.21600800  |
| H                     | -2.51175300 | 2.70266700                                                                           | 0.80632100  |
| H                     | -0.13767900 | -1.71532800                                                                          | -1.14834400 |
| H                     | -4.24737000 | 0.46366900                                                                           | 0.72382800  |
| H                     | -4.26516300 | -1.92209400                                                                          | 0.04667200  |
| H                     | 3.69610100  | -0.64675200                                                                          | -0.89324700 |
| H                     | 4.49844200  | 0.31581700                                                                           | 0.19101200  |
| H                     | -2.24374100 | -2.99361100                                                                          | -0.88016000 |
| H                     | 3.94283500  | 0.99352600                                                                           | -1.21068300 |
| <b>Cation - Water</b> |             | <b>[C<sub>11</sub>H<sub>12</sub>N<sub>2</sub>O<sub>2</sub>]<sup>++</sup> - Water</b> |             |
| 12                    |             |                                                                                      |             |
| O                     | 1.34165800  | 0.68183900                                                                           | 1.43308000  |
| O                     | 3.43493900  | -0.12608200                                                                          | 1.64169000  |
| N                     | -1.35914400 | 1.94268000                                                                           | -0.39804400 |
| N                     | 3.68028800  | -0.82743700                                                                          | -0.81943600 |
| C                     | 0.00285800  | 0.19128700                                                                           | -0.75555500 |
| C                     | 1.21627200  | -0.58214700                                                                          | -1.12412400 |
| C                     | -1.25993200 | -0.32010200                                                                          | -0.34309500 |
| C                     | 2.48593700  | 0.02349800                                                                           | -0.53116800 |
| C                     | -2.10613700 | 0.78535000                                                                           | -0.11364800 |
| C                     | -0.13746400 | 1.61704500                                                                           | -0.77463600 |
| C                     | -1.74558700 | -1.61688800                                                                          | -0.13055000 |
| C                     | -3.40724400 | 0.65980200                                                                           | 0.31557900  |
| C                     | -3.05890700 | -1.76215500                                                                          | 0.29865300  |



|                                      |             |             |                                                                                     |
|--------------------------------------|-------------|-------------|-------------------------------------------------------------------------------------|
| C                                    | -3.87239200 | -0.64590100 | 0.51785300                                                                          |
| C                                    | 2.41016700  | 0.20272900  | 1.01801700                                                                          |
| H                                    | 1.29535100  | -0.61416700 | -2.21767700                                                                         |
| H                                    | 1.09631500  | -1.61178700 | -0.77749800                                                                         |
| H                                    | 2.69304000  | 1.00298900  | -0.96408400                                                                         |
| H                                    | 0.59238000  | 2.36849300  | -1.03562100                                                                         |
| H                                    | -1.70472200 | 2.89213700  | -0.32107300                                                                         |
| H                                    | -1.11737600 | -2.48352400 | -0.29573200                                                                         |
| H                                    | -4.04019600 | 1.51973500  | 0.49092300                                                                          |
| H                                    | -4.89107500 | -0.79074300 | 0.85529900                                                                          |
| H                                    | 4.28522600  | -0.72098800 | 0.01619100                                                                          |
| H                                    | 4.18333100  | -0.55843800 | -1.66576800                                                                         |
| H                                    | -3.46024100 | -2.75254100 | 0.46944700                                                                          |
| H                                    | 3.44176200  | -1.81902500 | -0.89416600                                                                         |
| <b>Radical Form (N3-H20) - Water</b> |             |             | <b>[C<sub>11</sub>H<sub>11</sub>N<sub>2</sub>O<sub>2</sub>]<sup>•</sup> - Water</b> |
| 0 2                                  |             |             |                                                                                     |
| O                                    | 1.29600000  | -0.47065200 | 1.80955900                                                                          |
| O                                    | 2.67413600  | -1.78873000 | 0.60698200                                                                          |
| N                                    | -1.65002900 | 2.09162400  | 0.51582800                                                                          |
| N                                    | 3.73699000  | 0.14270900  | -0.70791700                                                                         |
| C                                    | 0.01608300  | 0.90556500  | -0.54124600                                                                         |
| C                                    | 1.35301900  | 0.62143900  | -1.12595600                                                                         |
| C                                    | -1.11543200 | 0.03993400  | -0.46232300                                                                         |
| C                                    | 2.43539600  | 0.47600000  | -0.04310500                                                                         |
| C                                    | -2.11820900 | 0.79526500  | 0.19631300                                                                          |
| C                                    | -0.41827600 | 2.13684600  | 0.08365900                                                                          |
| C                                    | -1.35867200 | -1.27452500 | -0.86007800                                                                         |
| C                                    | -3.36090400 | 0.25682900  | 0.45721200                                                                          |

|                               |             |                                                                                     |             |
|-------------------------------|-------------|-------------------------------------------------------------------------------------|-------------|
| C                             | -2.61667400 | -1.81840200                                                                         | -0.59551300 |
| C                             | -3.59901500 | -1.06572900                                                                         | 0.05032500  |
| C                             | 2.10394000  | -0.71488500                                                                         | 0.90560100  |
| H                             | 1.63389000  | 1.44287900                                                                          | -1.79423400 |
| H                             | 1.31527600  | -0.29792000                                                                         | -1.71745600 |
| H                             | 2.55592600  | 1.39982900                                                                          | 0.51877800  |
| H                             | 0.19145800  | 3.02662400                                                                          | 0.19300000  |
| H                             | -0.59661000 | -1.86297900                                                                         | -1.35932100 |
| H                             | -4.12618600 | 0.83448500                                                                          | 0.96191600  |
| H                             | -4.56717600 | -1.51214400                                                                         | 0.24359600  |
| H                             | 3.77283900  | -0.89373200                                                                         | -0.70023900 |
| H                             | 4.53546500  | 0.48255100                                                                          | -0.16952000 |
| H                             | -2.83471100 | -2.83651400                                                                         | -0.89326200 |
| H                             | 3.82247600  | 0.50162900                                                                          | -1.66029600 |
| <b>Anion (N3-H20) - Water</b> |             | <b>[C<sub>11</sub>H<sub>11</sub>N<sub>2</sub>O<sub>2</sub>]<sup>+</sup> - Water</b> |             |
| -1 1                          |             |                                                                                     |             |
| O                             | 1.47520400  | -0.98356000                                                                         | 1.79884000  |
| O                             | 2.45774300  | -1.84511000                                                                         | -0.03460200 |
| N                             | -1.91557200 | 2.09422300                                                                          | 0.50625900  |
| N                             | 3.72684600  | 0.37951700                                                                          | -0.50695300 |
| C                             | -0.02357100 | 1.11913400                                                                          | -0.39731800 |
| C                             | 1.37728400  | 0.96479400                                                                          | -0.89979500 |
| C                             | -1.05084000 | 0.13477900                                                                          | -0.37591900 |
| C                             | 2.38422500  | 0.50365400                                                                          | 0.16416900  |
| C                             | -2.19423200 | 0.79390200                                                                          | 0.19178200  |
| C                             | -0.61696300 | 2.26025600                                                                          | 0.14311000  |
| C                             | -1.13833700 | -1.21511600                                                                         | -0.76687200 |
| C                             | -3.40131600 | 0.08636400                                                                          | 0.35244900  |

|                                  |             |                                                                                         |             |
|----------------------------------|-------------|-----------------------------------------------------------------------------------------|-------------|
| C                                | -2.33682800 | -1.88911600                                                                             | -0.60113500 |
| C                                | -3.46363200 | -1.23980500                                                                             | -0.04273800 |
| C                                | 2.06583800  | -0.91529300                                                                             | 0.71222100  |
| H                                | 1.73386800  | 1.91898400                                                                              | -1.30486800 |
| H                                | 1.40585500  | 0.23537200                                                                              | -1.71903600 |
| H                                | 2.47194700  | 1.22995100                                                                              | 0.96992700  |
| H                                | -0.13078200 | 3.22297500                                                                              | 0.27515900  |
| H                                | -0.27149400 | -1.72492100                                                                             | -1.17931200 |
| H                                | -4.26853900 | 0.57956000                                                                              | 0.78219100  |
| H                                | -4.38854600 | -1.79376800                                                                             | 0.07772500  |
| H                                | 3.71394600  | -0.54227800                                                                             | -0.97025700 |
| H                                | 4.49507400  | 0.37638500                                                                              | 0.16553400  |
| H                                | -2.41706900 | -2.92968000                                                                             | -0.89696900 |
| H                                | 3.90347700  | 1.11929500                                                                              | -1.18886700 |
| <b>Inter1-N3-H2O-HAT - Water</b> |             | <b>C<sub>11</sub>H<sub>12</sub>N<sub>2</sub>O<sub>2</sub> + HOO<sup>•</sup> - Water</b> |             |
| 0 2                              |             |                                                                                         |             |
| O                                | -1.24151300 | -0.51719100                                                                             | -1.64568300 |
| O                                | -2.63688900 | -1.84060800                                                                             | -0.50237600 |
| N                                | 1.80506100  | 1.79121400                                                                              | 0.80482700  |
| N                                | -3.87188000 | 0.14940800                                                                              | 0.62970400  |
| C                                | -0.13009400 | 0.70570500                                                                              | 1.14545500  |
| C                                | -1.56908700 | 0.43308400                                                                              | 1.45437500  |
| C                                | 0.88114600  | -0.25605300                                                                             | 0.79779700  |
| C                                | -2.45678500 | 0.40715300                                                                              | 0.20107400  |
| C                                | 2.08134000  | 0.46280400                                                                              | 0.59085300  |
| C                                | 0.48114200  | 1.93117100                                                                              | 1.13520400  |
| C                                | 0.88198300  | -1.65109000                                                                             | 0.63584700  |
| C                                | 3.27825600  | -0.16941600                                                                             | 0.23858300  |

|                             |             |                                                                                        |             |
|-----------------------------|-------------|----------------------------------------------------------------------------------------|-------------|
| C                           | 2.06222700  | -2.28035800                                                                            | 0.28398000  |
| C                           | 3.25022400  | -1.54428600                                                                            | 0.08828700  |
| C                           | -2.08093700 | -0.76097500                                                                            | -0.74417000 |
| H                           | -1.94931300 | 1.20630500                                                                             | 2.12797100  |
| H                           | -1.66922800 | -0.52887400                                                                            | 1.96906000  |
| H                           | -2.42928600 | 1.36549100                                                                             | -0.31537500 |
| H                           | 0.06676800  | 2.90603000                                                                             | 1.34407300  |
| H                           | 2.46272400  | 2.54941400                                                                             | 0.71411400  |
| H                           | -0.03138200 | -2.22194800                                                                            | 0.77044000  |
| H                           | 4.18843400  | 0.39829400                                                                             | 0.08452500  |
| H                           | 4.15828600  | -2.06746300                                                                            | -0.18754700 |
| H                           | -3.96045600 | -0.86974700                                                                            | 0.75492500  |
| H                           | -4.54363200 | 0.42610300                                                                             | -0.08912400 |
| O                           | 1.29812900  | 1.02697500                                                                             | -2.36977400 |
| O                           | 0.15510100  | 1.52964100                                                                             | -1.98725300 |
| H                           | -0.45979900 | 0.71783400                                                                             | -1.78522000 |
| H                           | -4.12038200 | 0.63306900                                                                             | 1.49494600  |
| H                           | 2.07989900  | -3.35583100                                                                            | 0.15248400  |
| <b>TS-N3-H2O-HAT- Water</b> |             | <b>C<sub>11</sub>H<sub>12</sub>N<sub>2</sub>O<sub>2</sub> + HOO<sup>•</sup>- Water</b> |             |
| 0 2                         |             |                                                                                        |             |
| O                           | -1.08551700 | 0.31730400                                                                             | -1.65632000 |
| O                           | -2.31264200 | -1.53777400                                                                            | -1.36574500 |
| N                           | 1.64908300  | 1.46956100                                                                             | 1.00250000  |
| N                           | -3.80256700 | -0.47376700                                                                            | 0.48221600  |
| C                           | -0.15020300 | 0.08684200                                                                             | 1.27626500  |
| C                           | -1.55977500 | -0.34345700                                                                            | 1.49498700  |
| C                           | 0.90376500  | -0.69969500                                                                            | 0.68438100  |
| C                           | -2.43602300 | 0.11854200                                                                             | 0.31398900  |

|                |             |             |             |      |       |      |         |      |      |  |
|----------------|-------------|-------------|-------------|------|-------|------|---------|------|------|--|
| C              | 1.98668200  | 0.18338200  | 0.50761500  |      |       |      |         |      |      |  |
| C              | 0.36788000  | 1.36439300  | 1.44865900  |      |       |      |         |      |      |  |
| C              | 0.99982000  | -2.02742300 | 0.27086600  |      |       |      |         |      |      |  |
| C              | 3.16337200  | -0.22054200 | -0.09412100 |      |       |      |         |      |      |  |
| C              | 2.18732200  | -2.44320900 | -0.32921300 |      |       |      |         |      |      |  |
| C              | 3.24944000  | -1.55318000 | -0.51158700 |      |       |      |         |      |      |  |
| C              | -1.89471800 | -0.41479600 | -1.04392100 |      |       |      |         |      |      |  |
| H              | -1.95482400 | 0.08806900  | 2.41831900  |      |       |      |         |      |      |  |
| H              | -1.61718200 | -1.43300100 | 1.57324900  |      |       |      |         |      |      |  |
| H              | -2.52947600 | 1.20313500  | 0.30446600  |      |       |      |         |      |      |  |
| H              | -0.14277400 | 2.22223300  | 1.86237400  |      |       |      |         |      |      |  |
| H              | 1.63364000  | 2.23032400  | 0.06706100  |      |       |      |         |      |      |  |
| H              | 0.17632200  | -2.71977000 | 0.40718500  |      |       |      |         |      |      |  |
| H              | 3.98644600  | 0.46909100  | -0.23920900 |      |       |      |         |      |      |  |
| H              | 4.15982000  | -1.90210300 | -0.98410800 |      |       |      |         |      |      |  |
| H              | -3.75544900 | -1.42341800 | 0.08145700  |      |       |      |         |      |      |  |
| H              | -4.50753600 | 0.04488900  | -0.04546200 |      |       |      |         |      |      |  |
| O              | 1.19066700  | 2.62146700  | -1.04929900 |      |       |      |         |      |      |  |
| O              | -0.16346300 | 2.62329000  | -0.87047600 |      |       |      |         |      |      |  |
| H              | -0.49410800 | 1.73529200  | -1.20779700 |      |       |      |         |      |      |  |
| H              | -4.10856100 | -0.51524000 | 1.45631800  |      |       |      |         |      |      |  |
| H              | 2.29033600  | -3.46950400 | -0.65966300 |      |       |      |         |      |      |  |
| Frequencies -- | -2780.1092  |             | 48.6184     |      |       |      | 56.7087 |      |      |  |
| Red. masses -- | 1.1799      |             | 6.5930      |      |       |      | 6.5025  |      |      |  |
| Frc consts --  | 5.3731      |             | 0.0092      |      |       |      | 0.0123  |      |      |  |
| IR Inten --    | 66495.3737  |             | 14.3019     |      |       |      | 24.0742 |      |      |  |
| Atom AN        | X           | Y           | Z           | X    | Y     | Z    | X       | Y    | Z    |  |
| 1 8            | 0.00        | 0.01        | -0.00       | 0.14 | -0.08 | 0.00 | -0.06   | 0.25 | 0.06 |  |

|    |   |       |       |       |       |       |       |       |       |       |
|----|---|-------|-------|-------|-------|-------|-------|-------|-------|-------|
| 2  | 8 | 0.00  | 0.00  | -0.00 | 0.29  | -0.16 | 0.14  | 0.23  | 0.04  | -0.03 |
| 3  | 7 | 0.03  | 0.01  | -0.03 | 0.03  | 0.01  | 0.05  | -0.03 | -0.02 | -0.13 |
| 4  | 7 | -0.00 | 0.00  | -0.00 | 0.05  | -0.01 | -0.11 | 0.03  | -0.22 | -0.01 |
| 5  | 6 | 0.01  | 0.03  | 0.01  | -0.02 | 0.08  | 0.08  | -0.01 | -0.01 | 0.00  |
| 6  | 6 | -0.00 | 0.00  | 0.00  | -0.04 | 0.12  | 0.06  | -0.00 | -0.03 | 0.04  |
| 7  | 6 | 0.00  | 0.00  | 0.00  | -0.07 | 0.05  | 0.02  | -0.03 | -0.04 | 0.02  |
| 8  | 6 | 0.00  | -0.00 | 0.00  | 0.04  | 0.01  | -0.05 | -0.03 | -0.06 | 0.05  |
| 9  | 6 | -0.00 | 0.01  | -0.00 | -0.05 | 0.01  | -0.00 | -0.04 | -0.04 | -0.07 |
| 10 | 6 | -0.05 | -0.03 | 0.01  | 0.04  | 0.05  | 0.09  | -0.02 | 0.00  | -0.09 |
| 11 | 6 | 0.00  | -0.00 | -0.00 | -0.16 | 0.06  | -0.04 | -0.02 | -0.08 | 0.13  |
| 12 | 6 | 0.01  | -0.01 | -0.01 | -0.10 | -0.02 | -0.09 | -0.05 | -0.08 | -0.08 |
| 13 | 6 | -0.01 | -0.00 | 0.00  | -0.21 | 0.04  | -0.13 | -0.04 | -0.12 | 0.14  |
| 14 | 6 | 0.00  | 0.01  | 0.00  | -0.19 | -0.00 | -0.16 | -0.05 | -0.12 | 0.03  |
| 15 | 6 | -0.00 | -0.00 | 0.01  | 0.17  | -0.09 | 0.04  | 0.06  | 0.09  | 0.03  |
| 16 | 1 | -0.01 | -0.01 | -0.00 | -0.08 | 0.23  | -0.01 | -0.00 | -0.04 | 0.04  |
| 17 | 1 | -0.01 | -0.00 | 0.00  | -0.06 | 0.13  | 0.17  | 0.03  | -0.03 | 0.04  |
| 18 | 1 | -0.00 | -0.00 | 0.00  | 0.02  | 0.00  | -0.14 | -0.16 | -0.07 | 0.11  |
| 19 | 1 | -0.01 | 0.00  | -0.01 | 0.08  | 0.07  | 0.11  | -0.00 | 0.02  | -0.11 |
| 20 | 1 | 0.29  | -0.40 | 0.85  | 0.01  | 0.02  | 0.05  | 0.00  | -0.00 | -0.10 |
| 21 | 1 | -0.00 | 0.00  | 0.00  | -0.19 | 0.10  | -0.03 | -0.01 | -0.07 | 0.22  |
| 22 | 1 | 0.00  | -0.00 | -0.00 | -0.08 | -0.05 | -0.12 | -0.06 | -0.09 | -0.15 |
| 23 | 1 | 0.00  | 0.00  | -0.00 | -0.23 | -0.02 | -0.23 | -0.06 | -0.15 | 0.03  |
| 24 | 1 | -0.00 | 0.00  | 0.00  | 0.11  | -0.05 | -0.01 | 0.15  | -0.20 | -0.05 |
| 25 | 1 | -0.00 | -0.00 | 0.00  | 0.08  | -0.08 | -0.23 | -0.02 | -0.28 | 0.01  |
| 26 | 8 | -0.06 | 0.01  | -0.02 | -0.00 | 0.03  | 0.06  | 0.01  | 0.09  | -0.07 |
| 27 | 8 | 0.04  | 0.00  | -0.01 | -0.00 | -0.05 | 0.05  | 0.01  | 0.26  | -0.02 |
| 28 | 1 | -0.05 | -0.11 | -0.05 | 0.05  | -0.06 | 0.02  | -0.08 | 0.29  | 0.03  |
| 29 | 1 | 0.01  | 0.00  | 0.00  | -0.04 | 0.08  | -0.13 | 0.02  | -0.31 | -0.01 |

|                                              |   |                             |                |                |                                                                              |      |       |       |       |      |
|----------------------------------------------|---|-----------------------------|----------------|----------------|------------------------------------------------------------------------------|------|-------|-------|-------|------|
| 30                                           | 1 | 0.00                        | -0.00          | -0.00          | -0.28                                                                        | 0.05 | -0.19 | -0.03 | -0.14 | 0.23 |
| Zero-point correction=                       |   | 0.234341 (Hartree/Particle) |                |                |                                                                              |      |       |       |       |      |
| Thermal correction to Energy=                |   | 0.249401                    |                |                |                                                                              |      |       |       |       |      |
| Thermal correction to Enthalpy=              |   | 0.250346                    |                |                |                                                                              |      |       |       |       |      |
| Thermal correction to Gibbs Free Energy=     |   | 0.191220                    |                |                |                                                                              |      |       |       |       |      |
| Sum of electronic and zero-point Energies=   |   | -836.945848                 |                |                |                                                                              |      |       |       |       |      |
| Sum of electronic and thermal Energies=      |   | -836.930788                 |                |                |                                                                              |      |       |       |       |      |
| Sum of electronic and thermal Enthalpies=    |   | -836.929844                 |                |                |                                                                              |      |       |       |       |      |
| Sum of electronic and thermal Free Energies= |   | -836.988970                 |                |                |                                                                              |      |       |       |       |      |
|                                              |   | E (Thermal)                 | CV             | S              |                                                                              |      |       |       |       |      |
|                                              |   | KCal/Mol                    | Cal/Mol-Kelvin | Cal/Mol-Kelvin |                                                                              |      |       |       |       |      |
| Total                                        |   | 156.502                     | 57.334         | 124.441        |                                                                              |      |       |       |       |      |
| Electronic                                   |   | 0.000                       | 0.000          | 1.377          |                                                                              |      |       |       |       |      |
| Translational                                |   | 0.889                       | 2.981          | 42.291         |                                                                              |      |       |       |       |      |
| Rotational                                   |   | 0.889                       | 2.981          | 32.526         |                                                                              |      |       |       |       |      |
| Vibrational                                  |   | 154.724                     | 51.373         | 48.247         |                                                                              |      |       |       |       |      |
| HF=-837.1801897                              |   |                             |                |                |                                                                              |      |       |       |       |      |
| <b>Inter2-N3-H2O-HAT- Water</b>              |   |                             |                |                | <b>C<sub>11</sub>H<sub>12</sub>N<sub>2</sub>O<sub>2</sub> + HOO• - Water</b> |      |       |       |       |      |
| 0                                            | 2 |                             |                |                |                                                                              |      |       |       |       |      |
| O                                            |   | -1.18099600                 | 0.49845200     | -1.49958300    |                                                                              |      |       |       |       |      |
| O                                            |   | -2.46502300                 | -1.34288800    | -1.58348500    |                                                                              |      |       |       |       |      |
| N                                            |   | 1.60502800                  | 1.33841400     | 1.23441300     |                                                                              |      |       |       |       |      |
| N                                            |   | -3.77516600                 | -0.76588000    | 0.57745600     |                                                                              |      |       |       |       |      |
| C                                            |   | -0.07910100                 | -0.22857400    | 1.22990100     |                                                                              |      |       |       |       |      |
| C                                            |   | -1.44956100                 | -0.77637400    | 1.40576400     |                                                                              |      |       |       |       |      |
| C                                            |   | 1.02913000                  | -0.82025600    | 0.55851600     |                                                                              |      |       |       |       |      |
| C                                            |   | -2.43818400                 | -0.10647000    | 0.43237100     |                                                                              |      |       |       |       |      |
| C                                            |   | 2.04643400                  | 0.16652400     | 0.57176100     |                                                                              |      |       |       |       |      |

|                                 |             |                                                                                     |             |
|---------------------------------|-------------|-------------------------------------------------------------------------------------|-------------|
| C                               | 0.37927600  | 1.08890600                                                                          | 1.61542300  |
| C                               | 1.24018700  | -2.05226500                                                                         | -0.06331000 |
| C                               | 3.26854000  | -0.05679300                                                                         | -0.02423700 |
| C                               | 2.47917900  | -2.28040100                                                                         | -0.66253600 |
| C                               | 3.47383500  | -1.30119200                                                                         | -0.64271800 |
| C                               | -1.99145100 | -0.33123800                                                                         | -1.03994700 |
| H                               | -1.78926800 | -0.59682400                                                                         | 2.43079500  |
| H                               | -1.45013300 | -1.85545700                                                                         | 1.22804900  |
| H                               | -2.54760900 | 0.95354300                                                                          | 0.65453200  |
| H                               | -0.21325400 | 1.82426200                                                                          | 2.14665100  |
| H                               | 1.30616900  | 2.68383600                                                                          | -0.19241300 |
| H                               | 0.46732500  | -2.81266500                                                                         | -0.08454300 |
| H                               | 4.04199300  | 0.70194500                                                                          | -0.01910200 |
| H                               | 4.42647100  | -1.50386900                                                                         | -1.11737100 |
| H                               | -3.76522600 | -1.56223500                                                                         | -0.08178700 |
| H                               | -4.53442100 | -0.14330600                                                                         | 0.29460500  |
| O                               | 0.85822500  | 3.00873000                                                                          | -0.99514300 |
| O                               | -0.51540100 | 2.93306200                                                                          | -0.62943800 |
| H                               | -0.77461100 | 2.03182700                                                                          | -0.94224400 |
| H                               | -3.97362200 | -1.09141400                                                                         | 1.52549500  |
| H                               | 2.67301600  | -3.22742800                                                                         | -1.15046600 |
| <b>Anion (Adibatic) - Water</b> |             | <b>[C<sub>11</sub>H<sub>12</sub>N<sub>2</sub>O<sub>2</sub>]<sup>-</sup> - Water</b> |             |
| -1 2                            |             |                                                                                     |             |
| O                               | 1.58767700  | -0.66649200                                                                         | 1.92293700  |
| O                               | 2.63693500  | -1.83364400                                                                         | 0.30940300  |
| N                               | -1.76930400 | 2.01534200                                                                          | 0.46192000  |
| N                               | 3.73667700  | 0.27813300                                                                          | -0.69713900 |
| C                               | -0.01249200 | 0.99491300                                                                          | -0.47673400 |



|                                 |             |             |                                                                                     |
|---------------------------------|-------------|-------------|-------------------------------------------------------------------------------------|
| C                               | 1.34797200  | 0.73055000  | -1.04430100                                                                         |
| C                               | -1.08493100 | 0.06315800  | -0.40760800                                                                         |
| C                               | 2.43146600  | 0.50086200  | 0.01822000                                                                          |
| C                               | -2.18273300 | 0.73644300  | 0.18452200                                                                          |
| C                               | -0.44989700 | 2.19922700  | 0.05960400                                                                          |
| C                               | -1.24080800 | -1.31434000 | -0.80940100                                                                         |
| C                               | -3.44204700 | 0.13352200  | 0.40464500                                                                          |
| C                               | -2.50151400 | -1.91572900 | -0.58543000                                                                         |
| C                               | -3.56477500 | -1.23593300 | -0.00570300                                                                         |
| C                               | 2.18800400  | -0.79154500 | 0.84731800                                                                          |
| H                               | 1.66575200  | 1.57526000  | -1.66708200                                                                         |
| H                               | 1.31265400  | -0.15356000 | -1.69133200                                                                         |
| H                               | 2.53888700  | 1.36998000  | 0.66437500                                                                          |
| H                               | 0.05035200  | 3.14575300  | 0.18674400                                                                          |
| H                               | -2.34881300 | 2.72774800  | 0.87487900                                                                          |
| H                               | -0.41962300 | -1.87354800 | -1.24274700                                                                         |
| H                               | -4.26305900 | 0.67770900  | 0.85544800                                                                          |
| H                               | -4.50891300 | -1.75130300 | 0.14035800                                                                          |
| H                               | 3.75043100  | -0.73209700 | -0.91447900                                                                         |
| H                               | 4.54197900  | 0.47697100  | -0.10198400                                                                         |
| H                               | -2.64539600 | -2.95358300 | -0.87587500                                                                         |
| H                               | 3.82777800  | 0.83065600  | -1.55129100                                                                         |
| <b>Anion (Vertical) - Water</b> |             |             | <b>[C<sub>11</sub>H<sub>12</sub>N<sub>2</sub>O<sub>2</sub>]<sup>-</sup> - Water</b> |
| -1                              | 2           |             |                                                                                     |
| O                               | 1.33267600  | -0.89124100 | 1.78425000                                                                          |
| O                               | 2.39766200  | -1.85467400 | 0.04804800                                                                          |
| N                               | -1.87172300 | 2.02177800  | 0.42903900                                                                          |
| N                               | 3.73526000  | 0.30268900  | -0.48735500                                                                         |

|                                  |             |                                                                                     |             |
|----------------------------------|-------------|-------------------------------------------------------------------------------------|-------------|
| C                                | 0.01289400  | 1.13579500                                                                          | -0.41486900 |
| C                                | 1.41692900  | 0.98174700                                                                          | -0.90951000 |
| C                                | -1.00221000 | 0.11638200                                                                          | -0.38315200 |
| C                                | 2.39793300  | 0.50180200                                                                          | 0.16896400  |
| C                                | -2.17046400 | 0.70985500                                                                          | 0.14972700  |
| C                                | -0.56428100 | 2.27184600                                                                          | 0.08378800  |
| C                                | -1.02938400 | -1.23649600                                                                         | -0.75725900 |
| C                                | -3.36094500 | -0.00633900                                                                         | 0.31428200  |
| C                                | -2.20504500 | -1.94812900                                                                         | -0.59784600 |
| C                                | -3.36016600 | -1.33690400                                                                         | -0.06669100 |
| C                                | 1.99872700  | -0.88861000                                                                         | 0.74166500  |
| H                                | 1.77403100  | 1.93759200                                                                          | -1.30420700 |
| H                                | 1.43653100  | 0.25891900                                                                          | -1.73306500 |
| H                                | 2.50785400  | 1.23955600                                                                          | 0.96109700  |
| H                                | -0.14147300 | 3.25640100                                                                          | 0.21600800  |
| H                                | -2.51175300 | 2.70266700                                                                          | 0.80632100  |
| H                                | -0.13767900 | -1.71532800                                                                         | -1.14834400 |
| H                                | -4.24737000 | 0.46366900                                                                          | 0.72382800  |
| H                                | -4.26516300 | -1.92209400                                                                         | 0.04667200  |
| H                                | 3.69610100  | -0.64675200                                                                         | -0.89324700 |
| H                                | 4.49844200  | 0.31581700                                                                          | 0.19101200  |
| H                                | -2.24374100 | -2.99361100                                                                         | -0.88016000 |
| H                                | 3.94283500  | 0.99352600                                                                          | -1.21068300 |
| <b>Cation (Vertical) - Water</b> |             | <b>[C<sub>11</sub>H<sub>12</sub>N<sub>2</sub>O<sub>2</sub>]<sup>+</sup> - Water</b> |             |
| 1 2                              |             |                                                                                     |             |
| O                                | 1.33267600  | -0.89124100                                                                         | 1.78425000  |
| O                                | 2.39766200  | -1.85467400                                                                         | 0.04804800  |
| N                                | -1.87172300 | 2.02177800                                                                          | 0.42903900  |

|   |             |             |             |
|---|-------------|-------------|-------------|
| N | 3.73526000  | 0.30268900  | -0.48735500 |
| C | 0.01289400  | 1.13579500  | -0.41486900 |
| C | 1.41692900  | 0.98174700  | -0.90951000 |
| C | -1.00221000 | 0.11638200  | -0.38315200 |
| C | 2.39793300  | 0.50180200  | 0.16896400  |
| C | -2.17046400 | 0.70985500  | 0.14972700  |
| C | -0.56428100 | 2.27184600  | 0.08378800  |
| C | -1.02938400 | -1.23649600 | -0.75725900 |
| C | -3.36094500 | -0.00633900 | 0.31428200  |
| C | -2.20504500 | -1.94812900 | -0.59784600 |
| C | -3.36016600 | -1.33690400 | -0.06669100 |
| C | 1.99872700  | -0.88861000 | 0.74166500  |
| H | 1.77403100  | 1.93759200  | -1.30420700 |
| H | 1.43653100  | 0.25891900  | -1.73306500 |
| H | 2.50785400  | 1.23955600  | 0.96109700  |
| H | -0.14147300 | 3.25640100  | 0.21600800  |
| H | -2.51175300 | 2.70266700  | 0.80632100  |
| H | -0.13767900 | -1.71532800 | -1.14834400 |
| H | -4.24737000 | 0.46366900  | 0.72382800  |
| H | -4.26516300 | -1.92209400 | 0.04667200  |
| H | 3.69610100  | -0.64675200 | -0.89324700 |
| H | 4.49844200  | 0.31581700  | 0.19101200  |
| H | -2.24374100 | -2.99361100 | -0.88016000 |
| H | 3.94283500  | 0.99352600  | -1.21068300 |

**Table S5.** Optimized structures of HLP forms in water using M06-2X/6-311++g(d,p)

| Stable Neutral form - Water | C <sub>11</sub> H <sub>12</sub> N <sub>2</sub> O <sub>3</sub> - Water |
|-----------------------------|-----------------------------------------------------------------------|
| 0 1                         |                                                                       |

|   |             |             |             |
|---|-------------|-------------|-------------|
| O | -2.52942900 | -2.71600500 | -0.54976600 |
| O | 1.40713000  | -0.80584000 | 1.85196500  |
| O | 2.26249600  | -2.02739800 | 0.16318900  |
| N | -1.30653400 | 2.56370900  | 0.29984800  |
| N | 3.91453300  | -0.14337500 | -0.52012300 |
| C | 0.38029000  | 1.29243600  | -0.46834700 |
| C | 1.72427000  | 0.86090700  | -0.96480400 |
| C | -0.78624000 | 0.46531700  | -0.32311900 |
| C | 2.63715400  | 0.30198300  | 0.13503400  |
| C | -1.82467100 | 1.29453700  | 0.15781900  |
| C | 0.01097200  | 2.55436200  | -0.08163400 |
| C | -1.03365400 | -0.89598400 | -0.55948300 |
| C | -3.10554700 | 0.79738700  | 0.40414000  |
| C | -2.30322700 | -1.38252300 | -0.31549800 |
| C | -3.33360700 | -0.54589700 | 0.16117000  |
| C | 2.03859800  | -0.97068800 | 0.80101500  |
| H | 2.22948000  | 1.70866500  | -1.43734600 |
| H | 1.60096800  | 0.08589700  | -1.73008900 |
| H | 2.87593900  | 1.06191300  | 0.87605300  |
| H | 0.59597300  | 3.46151900  | -0.05654200 |
| H | -1.81523100 | 3.37585600  | 0.61114500  |
| H | -0.25103100 | -1.56491500 | -0.90116000 |
| H | -3.89921600 | 1.43626300  | 0.77235200  |
| H | -4.31710600 | -0.96696000 | 0.34134900  |
| H | 3.72164300  | -1.09792200 | -0.86515400 |
| H | 4.68532200  | -0.20554200 | 0.14678600  |
| H | -3.43949500 | -2.93636500 | -0.32813900 |
| H | 4.20915100  | 0.46217700  | -1.28818300 |

|     | Cation - Water |             | [C <sub>11</sub> H <sub>12</sub> N <sub>2</sub> O <sub>3</sub> ] <sup>++</sup> - Water |
|-----|----------------|-------------|----------------------------------------------------------------------------------------|
| 1 2 |                |             |                                                                                        |
| O   | -2.42681500    | -2.66740000 | -0.54119900                                                                            |
| O   | 1.22913900     | -0.76185600 | 1.78089600                                                                             |
| O   | 2.14014200     | -2.02078500 | 0.14851300                                                                             |
| N   | -1.32390200    | 2.51724400  | 0.27502400                                                                             |
| N   | 3.91572300     | -0.21006500 | -0.43901600                                                                            |
| C   | 0.43192500     | 1.31995700  | -0.46547700                                                                            |
| C   | 1.78913600     | 0.90793900  | -0.93549900                                                                            |
| C   | -0.73450100    | 0.45750200  | -0.34014300                                                                            |
| C   | 2.64265100     | 0.28457000  | 0.18045600                                                                             |
| C   | -1.80695300    | 1.27991700  | 0.13307800                                                                             |
| C   | 0.02620600     | 2.55661100  | -0.08596300                                                                            |
| C   | -0.95226100    | -0.87239700 | -0.56456500                                                                            |
| C   | -3.11061700    | 0.77205300  | 0.37913500                                                                             |
| C   | -2.26284700    | -1.38114400 | -0.31523800                                                                            |
| C   | -3.32666800    | -0.55488400 | 0.15158200                                                                             |
| C   | 1.93828100     | -0.96251200 | 0.78777500                                                                             |
| H   | 2.30830200     | 1.77848200  | -1.34294100                                                                            |
| H   | 1.68331900     | 0.17448400  | -1.74201400                                                                            |
| H   | 2.88860300     | 1.01646700  | 0.94640300                                                                             |
| H   | 0.56921700     | 3.48693500  | -0.03760200                                                                            |
| H   | -1.85372300    | 3.32016500  | 0.59268600                                                                             |
| H   | -0.17780000    | -1.55585200 | -0.89563400                                                                            |
| H   | -3.90025500    | 1.42048600  | 0.73596500                                                                             |
| H   | -4.29993900    | -0.99754900 | 0.32343300                                                                             |
| H   | 3.69351900     | -1.14736700 | -0.81244300                                                                            |
| H   | 4.65509900     | -0.32397100 | 0.25685900                                                                             |

| H                             | -3.32982000 | -2.96184800                                                          | -0.35241000 |
|-------------------------------|-------------|----------------------------------------------------------------------|-------------|
| H                             | 4.27487200  | 0.39396900                                                           | -1.18088900 |
| Radical Form (N4-H21) - Water |             | $[\text{C}_{11}\text{H}_{11}\text{N}_2\text{O}_3]^{\bullet}$ - Water |             |
| 0 2                           |             |                                                                      |             |
| O                             | -2.97795800 | -2.52590700                                                          | -0.53624100 |
| O                             | 1.42461500  | -0.38717400                                                          | 1.84482300  |
| O                             | 2.51393300  | -1.98312800                                                          | 0.68287200  |
| N                             | -1.06594400 | 2.59198900                                                           | 0.33591900  |
| N                             | 3.92231100  | -0.32148700                                                          | -0.68465500 |
| C                             | 0.39037200  | 1.07858400                                                           | -0.59775900 |
| C                             | 1.65731700  | 0.53647800                                                           | -1.15547900 |
| C                             | -0.85329800 | 0.39069300                                                           | -0.39964000 |
| C                             | 2.69382800  | 0.25942300                                                           | -0.05237100 |
| C                             | -1.71884700 | 1.34841700                                                           | 0.17916500  |
| C                             | 0.14969800  | 2.41665400                                                           | -0.11733700 |
| C                             | -1.27205900 | -0.91073200                                                          | -0.63892700 |
| C                             | -3.01151600 | 1.01229500                                                           | 0.51810700  |
| C                             | -2.58856700 | -1.24349500                                                          | -0.29106000 |
| C                             | -3.44430100 | -0.30044200                                                          | 0.27592500  |
| C                             | 2.15924200  | -0.81140700                                                          | 0.94485100  |
| H                             | 2.07951900  | 1.25931000                                                           | -1.86172200 |
| H                             | 1.46047100  | -0.39273200                                                          | -1.69863300 |
| H                             | 2.96807500  | 1.17474400                                                           | 0.46742300  |
| H                             | 0.87770700  | 3.21969900                                                           | -0.12138500 |
| H                             | -0.62595700 | -1.66499100                                                          | -1.07402800 |
| H                             | -3.68187000 | 1.73759400                                                           | 0.96376700  |
| H                             | -4.45734900 | -0.58941000                                                          | 0.53372500  |
| H                             | 3.77262300  | -1.34666500                                                          | -0.65467100 |

|                               |             |                                                                                     |             |
|-------------------------------|-------------|-------------------------------------------------------------------------------------|-------------|
| H                             | 4.76052100  | -0.11778200                                                                         | -0.13791600 |
| H                             | -3.89066700 | -2.65641900                                                                         | -0.25782800 |
| H                             | 4.08642400  | -0.00599600                                                                         | -1.64206700 |
| <b>Anion (N4-H21) - Water</b> |             | <b>[C<sub>11</sub>H<sub>11</sub>N<sub>2</sub>O<sub>3</sub>]<sup>+</sup> - Water</b> |             |
| -1                            | 1           |                                                                                     |             |
| O                             | -2.70600700 | -2.64388900                                                                         | -0.55287800 |
| O                             | 1.55909700  | -0.87011900                                                                         | 1.88218700  |
| O                             | 2.35196700  | -2.02782000                                                                         | 0.12146200  |
| N                             | -1.32152600 | 2.63779300                                                                          | 0.35988800  |
| N                             | 3.93117900  | -0.07835900                                                                         | -0.56903600 |
| C                             | 0.35209300  | 1.26682400                                                                          | -0.45797300 |
| C                             | 1.69117800  | 0.83739100                                                                          | -0.96818600 |
| C                             | -0.81826500 | 0.47608400                                                                          | -0.31736300 |
| C                             | 2.64685000  | 0.31220100                                                                          | 0.11355400  |
| C                             | -1.81957100 | 1.37046100                                                                          | 0.19027400  |
| C                             | -0.03064700 | 2.54523600                                                                          | -0.03435900 |
| C                             | -1.13097900 | -0.87798200                                                                         | -0.56232300 |
| C                             | -3.11468400 | 0.89058800                                                                          | 0.43857000  |
| C                             | -2.41508700 | -1.31363600                                                                         | -0.30823900 |
| C                             | -3.40859000 | -0.44160400                                                                         | 0.18894100  |
| C                             | 2.12698900  | -0.98769500                                                                         | 0.78786800  |
| H                             | 2.18498200  | 1.68006400                                                                          | -1.46636700 |
| H                             | 1.57465700  | 0.04417100                                                                          | -1.71759900 |
| H                             | 2.87232200  | 1.07945700                                                                          | 0.85144600  |
| H                             | 0.61286100  | 3.42078300                                                                          | -0.01553100 |
| H                             | -0.38523600 | -1.58042600                                                                         | -0.92274300 |
| H                             | -3.88256100 | 1.55526400                                                                          | 0.82271200  |
| H                             | -4.40617100 | -0.82734800                                                                         | 0.37664400  |

|                                      |             |                                                                                     |             |
|--------------------------------------|-------------|-------------------------------------------------------------------------------------|-------------|
| H                                    | 3.76356100  | -1.02878500                                                                         | -0.93509500 |
| H                                    | 4.71513000  | -0.13101800                                                                         | 0.08282100  |
| H                                    | -3.62185200 | -2.81620300                                                                         | -0.31542800 |
| H                                    | 4.18854600  | 0.55541100                                                                          | -1.32758800 |
| <b>Radical Form (O1-H27) - Water</b> |             | <b>[C<sub>11</sub>H<sub>11</sub>N<sub>2</sub>O<sub>3</sub>]<sup>•</sup> - Water</b> |             |
| 0 2                                  |             |                                                                                     |             |
| O                                    | -2.51284500 | -2.73374800                                                                         | -0.56037000 |
| O                                    | 1.33224600  | -0.78255300                                                                         | 1.81915800  |
| O                                    | 2.26514300  | -1.99468300                                                                         | 0.16428400  |
| N                                    | -1.40565900 | 2.46597600                                                                          | 0.30290300  |
| N                                    | 3.90042700  | -0.08610500                                                                         | -0.48798300 |
| C                                    | 0.34550100  | 1.28544900                                                                          | -0.46695200 |
| C                                    | 1.70577300  | 0.90030700                                                                          | -0.95441200 |
| C                                    | -0.79903800 | 0.40912300                                                                          | -0.33946800 |
| C                                    | 2.61060100  | 0.34008200                                                                          | 0.15222700  |
| C                                    | -1.87344100 | 1.20503100                                                                          | 0.14861300  |
| C                                    | -0.07114300 | 2.51987300                                                                          | -0.07043800 |
| C                                    | -0.99757600 | -0.93471600                                                                         | -0.58411900 |
| C                                    | -3.16554100 | 0.67524900                                                                          | 0.39605200  |
| C                                    | -2.29842700 | -1.51697400                                                                         | -0.34754400 |
| C                                    | -3.36348600 | -0.64847100                                                                         | 0.15113600  |
| C                                    | 2.00780100  | -0.94246700                                                                         | 0.79556500  |
| H                                    | 2.19333100  | 1.77182000                                                                          | -1.40000300 |
| H                                    | 1.60976800  | 0.13961000                                                                          | -1.73707900 |
| H                                    | 2.82923600  | 1.09507800                                                                          | 0.90418400  |
| H                                    | 0.46888800  | 3.45279700                                                                          | -0.02435100 |
| H                                    | -1.94511500 | 3.25535300                                                                          | 0.62751600  |
| H                                    | -0.20112500 | -1.58339000                                                                         | -0.93378300 |



|                               |             |                                                                                     |             |
|-------------------------------|-------------|-------------------------------------------------------------------------------------|-------------|
| H                             | -3.95982100 | 1.31181100                                                                          | 0.76747800  |
| H                             | -4.32811000 | -1.11164800                                                                         | 0.32052400  |
| H                             | 3.72679800  | -1.04458200                                                                         | -0.83339500 |
| H                             | 4.66341500  | -0.13517900                                                                         | 0.18913300  |
| H                             | 4.19687900  | 0.52219700                                                                          | -1.25320400 |
| <b>Anion (O1-H27) - Water</b> |             | <b>[C<sub>11</sub>H<sub>11</sub>N<sub>2</sub>O<sub>3</sub>]<sup>+</sup> - Water</b> |             |
| -1                            | 1           |                                                                                     |             |
| O                             | -2.77398200 | -2.73181800                                                                         | -0.55899700 |
| O                             | 1.55434400  | -0.60002800                                                                         | 1.93233500  |
| O                             | 2.43905400  | -1.99225100                                                                         | 0.39919600  |
| N                             | -1.29915900 | 2.49725200                                                                          | 0.32003000  |
| N                             | 3.89271300  | -0.14200700                                                                         | -0.66412600 |
| C                             | 0.31372300  | 1.18356800                                                                          | -0.52529000 |
| C                             | 1.63053300  | 0.71874500                                                                          | -1.06336100 |
| C                             | -0.87028200 | 0.37974000                                                                          | -0.34596100 |
| C                             | 2.64181500  | 0.33079600                                                                          | 0.02401300  |
| C                             | -1.85955700 | 1.23591700                                                                          | 0.18073300  |
| C                             | 0.00009700  | 2.45493400                                                                          | -0.11304600 |
| C                             | -1.16387100 | -0.97270300                                                                         | -0.59953200 |
| C                             | -3.14653400 | 0.76173700                                                                          | 0.45858800  |
| C                             | -2.45204200 | -1.49863800                                                                         | -0.33911800 |
| C                             | -3.42027800 | -0.56797800                                                                         | 0.20091600  |
| C                             | 2.15798200  | -0.87004200                                                                         | 0.88635600  |
| H                             | 2.08155200  | 1.50388300                                                                          | -1.67922500 |
| H                             | 1.47467700  | -0.15201100                                                                         | -1.71039100 |
| H                             | 2.89423300  | 1.18608900                                                                          | 0.64740600  |
| H                             | 0.61396000  | 3.34357300                                                                          | -0.10039700 |
| H                             | -1.77413000 | 3.32089500                                                                          | 0.65091500  |

|                                 |             |                                                                                        |             |
|---------------------------------|-------------|----------------------------------------------------------------------------------------|-------------|
| H                               | -0.39952100 | -1.63796600                                                                            | -0.99182000 |
| H                               | -3.91011800 | 1.41883800                                                                             | 0.86311600  |
| H                               | -4.41246500 | -0.95822700                                                                            | 0.40737100  |
| H                               | 3.73830700  | -1.15180300                                                                            | -0.82663400 |
| H                               | 4.71884200  | -0.04453100                                                                            | -0.07233300 |
| H                               | 4.07495800  | 0.34088200                                                                             | -1.54541100 |
| <b>Inter1-N4-H21-HAT- Water</b> |             | <b>C<sub>11</sub>H<sub>12</sub>N<sub>2</sub>O<sub>3</sub> + HOO<sup>•</sup>- Water</b> |             |
| 0 2                             |             |                                                                                        |             |
| O                               | -2.50909500 | -3.01630000                                                                            | -0.00119400 |
| O                               | 1.30097200  | -0.44464400                                                                            | 1.67099500  |
| O                               | 2.39156200  | -2.08363400                                                                            | 0.60823500  |
| N                               | -1.27665800 | 2.25700200                                                                             | -0.86953000 |
| N                               | 3.97747000  | -0.45830000                                                                            | -0.65140100 |
| C                               | 0.41371800  | 0.81003700                                                                             | -1.16953200 |
| C                               | 1.77133100  | 0.25838900                                                                             | -1.47217600 |
| C                               | -0.75598500 | 0.07022300                                                                             | -0.78451300 |
| C                               | 2.65605800  | 0.11186700                                                                             | -0.22517300 |
| C                               | -1.79614700 | 1.00923100                                                                             | -0.60392600 |
| C                               | 0.04366600  | 2.13039300                                                                             | -1.20470600 |
| C                               | -1.00768200 | -1.29550600                                                                            | -0.57620000 |
| C                               | -3.08157300 | 0.61802800                                                                             | -0.22691000 |
| C                               | -2.28066300 | -1.67762000                                                                            | -0.20142300 |
| C                               | -3.31272100 | -0.73145100                                                                            | -0.02832800 |
| C                               | 2.06496400  | -0.90226900                                                                            | 0.78610200  |
| H                               | 2.28404900  | 0.91884200                                                                             | -2.17731400 |
| H                               | 1.68202500  | -0.72437000                                                                            | -1.94854900 |
| H                               | 2.83649500  | 1.08000600                                                                             | 0.23935100  |
| H                               | 0.63483700  | 2.99987900                                                                             | -1.45030600 |

|                              |             |                                                                                        |             |
|------------------------------|-------------|----------------------------------------------------------------------------------------|-------------|
| H                            | -1.77719100 | 3.12886000                                                                             | -0.80129800 |
| H                            | -0.22904900 | -2.04293900                                                                            | -0.68554100 |
| H                            | -3.87528500 | 1.34245900                                                                             | -0.08945000 |
| H                            | -4.29975300 | -1.07179200                                                                            | 0.26671800  |
| H                            | 3.85433400  | -1.48209500                                                                            | -0.67807300 |
| H                            | 4.71742600  | -0.25653000                                                                            | 0.02385700  |
| H                            | -3.42393100 | -3.15617200                                                                            | 0.26213100  |
| O                            | -0.86952600 | 1.61820100                                                                             | 2.29235100  |
| O                            | 0.35221600  | 1.85809300                                                                             | 1.89823400  |
| H                            | 0.78824400  | 0.92896400                                                                             | 1.74185600  |
| H                            | 4.28329500  | -0.11768300                                                                            | -1.56510500 |
| <b>TS- N4-H21-HAT- Water</b> |             | <b>C<sub>11</sub>H<sub>12</sub>N<sub>2</sub>O<sub>3</sub> + HOO<sup>•</sup>- Water</b> |             |
| 0 2                          |             |                                                                                        |             |
| O                            | -3.08121000 | -2.77143100                                                                            | 0.35386900  |
| O                            | 1.26253600  | 0.03651900                                                                             | 1.66516300  |
| O                            | 1.92333300  | -2.06849200                                                                            | 1.26083500  |
| N                            | -0.89940800 | 2.13962000                                                                             | -0.93571800 |
| N                            | 3.71812900  | -1.35887400                                                                            | -0.48338100 |
| C                            | 0.42090400  | 0.30739500                                                                             | -1.28912400 |
| C                            | 1.64569800  | -0.51043800                                                                            | -1.51591400 |
| C                            | -0.84433300 | -0.16868200                                                                            | -0.77339000 |
| C                            | 2.57460600  | -0.40905800                                                                            | -0.29023100 |
| C                            | -1.62261800 | 0.98162200                                                                             | -0.55067200 |
| C                            | 0.31076100  | 1.68564000                                                                             | -1.37184400 |
| C                            | -1.33388300 | -1.43395600                                                                            | -0.47432600 |
| C                            | -2.88989900 | 0.89388600                                                                             | -0.00979000 |
| C                            | -2.61882200 | -1.52083000                                                                            | 0.06763800  |
| C                            | -3.38571400 | -0.37627600                                                                            | 0.29958200  |

|                |             |             |             |       |       |       |         |       |       |  |
|----------------|-------------|-------------|-------------|-------|-------|-------|---------|-------|-------|--|
| C              | 1.85336600  | -0.85430200 | 1.01480400  |       |       |       |         |       |       |  |
| H              | 2.18605700  | -0.15862400 | -2.39854700 |       |       |       |         |       |       |  |
| H              | 1.37873700  | -1.55939600 | -1.67448300 |       |       |       |         |       |       |  |
| H              | 2.97642400  | 0.59812900  | -0.19512000 |       |       |       |         |       |       |  |
| H              | 1.07006400  | 2.38018200  | -1.70179200 |       |       |       |         |       |       |  |
| H              | -0.68283000 | 2.79404400  | 0.05421900  |       |       |       |         |       |       |  |
| H              | -0.75972400 | -2.33804400 | -0.64229400 |       |       |       |         |       |       |  |
| H              | -3.48762900 | 1.77849000  | 0.17488100  |       |       |       |         |       |       |  |
| H              | -4.37938900 | -0.47894000 | 0.72220800  |       |       |       |         |       |       |  |
| H              | 3.38763100  | -2.27813200 | -0.15080500 |       |       |       |         |       |       |  |
| H              | 4.52557400  | -1.10025400 | 0.08742700  |       |       |       |         |       |       |  |
| H              | -3.96928900 | -2.72109100 | 0.72275000  |       |       |       |         |       |       |  |
| O              | -0.19080400 | 2.96543100  | 1.20134200  |       |       |       |         |       |       |  |
| O              | 1.11051600  | 2.57190000  | 1.07112400  |       |       |       |         |       |       |  |
| H              | 1.13906700  | 1.60120400  | 1.33086500  |       |       |       |         |       |       |  |
| H              | 4.02888300  | -1.42420800 | -1.45467700 |       |       |       |         |       |       |  |
| Frequencies -- | -2780.1092  |             | 48.6184     |       |       |       | 56.7087 |       |       |  |
| Red. masses -- | 1.1799      |             | 6.5930      |       |       |       | 6.5025  |       |       |  |
| Frc consts --  | 5.3731      |             | 0.0092      |       |       |       | 0.0123  |       |       |  |
| IR Inten --    | 66495.3737  |             | 14.3019     |       |       |       | 24.0742 |       |       |  |
| Atom AN        | X           | Y           | Z           | X     | Y     | Z     | X       | Y     | Z     |  |
| 1 8            | 0.00        | 0.01        | -0.00       | 0.14  | -0.08 | 0.00  | -0.06   | 0.25  | 0.06  |  |
| 2 8            | 0.00        | 0.00        | -0.00       | 0.29  | -0.16 | 0.14  | 0.23    | 0.04  | -0.03 |  |
| 3 7            | 0.03        | 0.01        | -0.03       | 0.03  | 0.01  | 0.05  | -0.03   | -0.02 | -0.13 |  |
| 4 7            | -0.00       | 0.00        | -0.00       | 0.05  | -0.01 | -0.11 | 0.03    | -0.22 | -0.01 |  |
| 5 6            | 0.01        | 0.03        | 0.01        | -0.02 | 0.08  | 0.08  | -0.01   | -0.01 | 0.00  |  |
| 6 6            | -0.00       | 0.00        | 0.00        | -0.04 | 0.12  | 0.06  | -0.00   | -0.03 | 0.04  |  |
| 7 6            | 0.00        | 0.00        | 0.00        | -0.07 | 0.05  | 0.02  | -0.03   | -0.04 | 0.02  |  |

|    |   |       |       |       |       |       |       |       |       |       |
|----|---|-------|-------|-------|-------|-------|-------|-------|-------|-------|
| 8  | 6 | 0.00  | -0.00 | 0.00  | 0.04  | 0.01  | -0.05 | -0.03 | -0.06 | 0.05  |
| 9  | 6 | -0.00 | 0.01  | -0.00 | -0.05 | 0.01  | -0.00 | -0.04 | -0.04 | -0.07 |
| 10 | 6 | -0.05 | -0.03 | 0.01  | 0.04  | 0.05  | 0.09  | -0.02 | 0.00  | -0.09 |
| 11 | 6 | 0.00  | -0.00 | -0.00 | -0.16 | 0.06  | -0.04 | -0.02 | -0.08 | 0.13  |
| 12 | 6 | 0.01  | -0.01 | -0.01 | -0.10 | -0.02 | -0.09 | -0.05 | -0.08 | -0.08 |
| 13 | 6 | -0.01 | -0.00 | 0.00  | -0.21 | 0.04  | -0.13 | -0.04 | -0.12 | 0.14  |
| 14 | 6 | 0.00  | 0.01  | 0.00  | -0.19 | -0.00 | -0.16 | -0.05 | -0.12 | 0.03  |
| 15 | 6 | -0.00 | -0.00 | 0.01  | 0.17  | -0.09 | 0.04  | 0.06  | 0.09  | 0.03  |
| 16 | 1 | -0.01 | -0.01 | -0.00 | -0.08 | 0.23  | -0.01 | -0.00 | -0.04 | 0.04  |
| 17 | 1 | -0.01 | -0.00 | 0.00  | -0.06 | 0.13  | 0.17  | 0.03  | -0.03 | 0.04  |
| 18 | 1 | -0.00 | -0.00 | 0.00  | 0.02  | 0.00  | -0.14 | -0.16 | -0.07 | 0.11  |
| 19 | 1 | -0.01 | 0.00  | -0.01 | 0.08  | 0.07  | 0.11  | -0.00 | 0.02  | -0.11 |
| 20 | 1 | 0.29  | -0.40 | 0.85  | 0.01  | 0.02  | 0.05  | 0.00  | -0.00 | -0.10 |
| 21 | 1 | -0.00 | 0.00  | 0.00  | -0.19 | 0.10  | -0.03 | -0.01 | -0.07 | 0.22  |
| 22 | 1 | 0.00  | -0.00 | -0.00 | -0.08 | -0.05 | -0.12 | -0.06 | -0.09 | -0.15 |
| 23 | 1 | 0.00  | 0.00  | -0.00 | -0.23 | -0.02 | -0.23 | -0.06 | -0.15 | 0.03  |
| 24 | 1 | -0.00 | 0.00  | 0.00  | 0.11  | -0.05 | -0.01 | 0.15  | -0.20 | -0.05 |
| 25 | 1 | -0.00 | -0.00 | 0.00  | 0.08  | -0.08 | -0.23 | -0.02 | -0.28 | 0.01  |
| 26 | 8 | -0.06 | 0.01  | -0.02 | -0.00 | 0.03  | 0.06  | 0.01  | 0.09  | -0.07 |
| 27 | 8 | 0.04  | 0.00  | -0.01 | -0.00 | -0.05 | 0.05  | 0.01  | 0.26  | -0.02 |
| 28 | 1 | -0.05 | -0.11 | -0.05 | 0.05  | -0.06 | 0.02  | -0.08 | 0.29  | 0.03  |
| 29 | 1 | 0.01  | 0.00  | 0.00  | -0.04 | 0.08  | -0.13 | 0.02  | -0.31 | -0.01 |
| 30 | 1 | 0.00  | -0.00 | -0.00 | -0.28 | 0.05  | -0.19 | -0.03 | -0.14 | 0.23  |

Zero-point correction= 0.238237 (Hartree/Particle)

Thermal correction to Energy= 0.254608

Thermal correction to Enthalpy= 0.255552

Thermal correction to Gibbs Free Energy= 0.193675

Sum of electronic and zero-point Energies= -912.168837

|                                              |             |                                                                                        |                |
|----------------------------------------------|-------------|----------------------------------------------------------------------------------------|----------------|
| Sum of electronic and thermal Energies=      |             |                                                                                        | -912.152466    |
| Sum of electronic and thermal Enthalpies=    |             |                                                                                        | -912.151522    |
| Sum of electronic and thermal Free Energies= |             |                                                                                        | -912.213399    |
|                                              | E (Thermal) | CV                                                                                     | S              |
|                                              | KCal/Mol    | Cal/Mol-Kelvin                                                                         | Cal/Mol-Kelvin |
| Total                                        | 159.769     | 62.207                                                                                 | 130.231        |
| Electronic                                   | 0.000       | 0.000                                                                                  | 1.377          |
| Translational                                | 0.889       | 2.981                                                                                  | 42.486         |
| Rotational                                   | 0.889       | 2.981                                                                                  | 33.021         |
| Vibrational                                  | 157.991     | 56.245                                                                                 | 53.347         |
| HF=-912.407074                               |             |                                                                                        |                |
| <b>Inter2-N4-H21-HAT- Water</b>              |             | <b>C<sub>11</sub>H<sub>12</sub>N<sub>2</sub>O<sub>3</sub> + HOO<sup>•</sup>- Water</b> |                |
| 0 2                                          |             |                                                                                        |                |
| O                                            | 3.32796500  | -2.58203000                                                                            | -0.65024100    |
| O                                            | -1.37202900 | 0.12841000                                                                             | -1.55371400    |
| O                                            | -2.08768000 | -1.99744200                                                                            | -1.42295400    |
| N                                            | 0.87938200  | 2.03749900                                                                             | 1.15894000     |
| N                                            | -3.67500700 | -1.54574500                                                                            | 0.57912900     |
| C                                            | -0.33142900 | 0.09108100                                                                             | 1.29556000     |
| C                                            | -1.51221300 | -0.78922200                                                                            | 1.49170900     |
| C                                            | 0.94377300  | -0.25377000                                                                            | 0.74012300     |
| C                                            | -2.56490900 | -0.55746400                                                                            | 0.39086200     |
| C                                            | 1.65925000  | 0.96356000                                                                             | 0.66639300     |
| C                                            | -0.26274000 | 1.51298300                                                                             | 1.52758100     |
| C                                            | 1.50043600  | -1.44628100                                                                            | 0.29509600     |
| C                                            | 2.93444100  | 1.00138600                                                                             | 0.14819000     |
| C                                            | 2.80078300  | -1.40070800                                                                            | -0.22555900    |
| C                                            | 3.50556700  | -0.20023400                                                                            | -0.29882300    |

|                                  |             |                                                                                        |             |
|----------------------------------|-------------|----------------------------------------------------------------------------------------|-------------|
| C                                | -1.95687000 | -0.83221500                                                                            | -1.01313700 |
| H                                | -1.96891200 | -0.58211000                                                                            | 2.46464900  |
| H                                | -1.20478200 | -1.83868300                                                                            | 1.47346100  |
| H                                | -2.98029600 | 0.44679400                                                                             | 0.45181800  |
| H                                | -1.06149200 | 2.11764200                                                                             | 1.93965400  |
| H                                | 0.32006000  | 3.06532600                                                                             | -0.44916100 |
| H                                | 0.97256300  | -2.39240900                                                                            | 0.33576900  |
| H                                | 3.48731500  | 1.93077100                                                                             | 0.08153400  |
| H                                | 4.50958100  | -0.19819000                                                                            | -0.70891900 |
| H                                | -3.38749600 | -2.39176000                                                                            | 0.05987300  |
| H                                | -4.54915700 | -1.21555000                                                                            | 0.16523600  |
| H                                | 4.22170400  | -2.44910700                                                                            | -0.98384400 |
| O                                | -0.13246900 | 3.15197500                                                                             | -1.30811500 |
| O                                | -1.45948000 | 2.74064700                                                                             | -0.99852900 |
| H                                | -1.43842700 | 1.77198800                                                                             | -1.19416900 |
| H                                | -3.85828300 | -1.77416600                                                                            | 1.55806800  |
| <b>Inter1- O1-H27-HAT- Water</b> |             | <b>C<sub>11</sub>H<sub>12</sub>N<sub>2</sub>O<sub>3</sub> + HOO<sup>•</sup>- Water</b> |             |
| 0 2                              |             |                                                                                        |             |
| O                                | -2.49854000 | -2.19062300                                                                            | -1.02327600 |
| O                                | 1.29618000  | -0.92184100                                                                            | 1.24395200  |
| O                                | 2.44934800  | -1.43348100                                                                            | -0.61220400 |
| N                                | -1.47152000 | 2.93880700                                                                             | 0.63039000  |
| N                                | 3.94693900  | 0.70190400                                                                             | -0.41401500 |
| C                                | 0.30911200  | 1.87308500                                                                             | -0.23081000 |
| C                                | 1.69475700  | 1.62576800                                                                             | -0.74195800 |
| C                                | -0.82418600 | 0.98852300                                                                             | -0.28646000 |
| C                                | 2.57646300  | 0.78413000                                                                             | 0.19433000  |
| C                                | -1.92145400 | 1.69009200                                                                             | 0.26009700  |

|                              |             |                                                                                        |             |
|------------------------------|-------------|----------------------------------------------------------------------------------------|-------------|
| C                            | -0.13900100 | 3.04130700                                                                             | 0.33088500  |
| C                            | -1.00394300 | -0.32821400                                                                            | -0.74393900 |
| C                            | -3.19175500 | 1.11487300                                                                             | 0.35731600  |
| C                            | -2.25512800 | -0.90126100                                                                            | -0.62252400 |
| C                            | -3.34510400 | -0.18509000                                                                            | -0.08583500 |
| C                            | 2.07326600  | -0.66986400                                                                            | 0.28389500  |
| H                            | 2.18840100  | 2.58967400                                                                             | -0.89574500 |
| H                            | 1.65455200  | 1.12137100                                                                             | -1.71439200 |
| H                            | 2.66303100  | 1.24076000                                                                             | 1.17774900  |
| H                            | 0.40133400  | 3.95471900                                                                             | 0.52959300  |
| H                            | -2.03181600 | 3.66692400                                                                             | 1.04419800  |
| H                            | -0.18057900 | -0.90303900                                                                            | -1.15698400 |
| H                            | -4.02742700 | 1.66322200                                                                             | 0.77555600  |
| H                            | -4.30436300 | -0.68370400                                                                            | -0.01668500 |
| H                            | 3.90944600  | -0.03027400                                                                            | -1.13759100 |
| H                            | 4.65140700  | 0.41799900                                                                             | 0.26969200  |
| H                            | -1.66647300 | -2.68125200                                                                            | -0.97536200 |
| H                            | 4.24990000  | 1.58487400                                                                             | -0.82968800 |
| O                            | -0.20448000 | -3.46647900                                                                            | 0.10547800  |
| O                            | 0.28315500  | -3.16738700                                                                            | 1.27469100  |
| H                            | 0.72119100  | -2.18786400                                                                            | 1.21590900  |
| <b>TS- O1-H27-HAT- Water</b> |             | <b>C<sub>11</sub>H<sub>12</sub>N<sub>2</sub>O<sub>3</sub> + HOO<sup>•</sup>- Water</b> |             |
| 0 2                          |             |                                                                                        |             |
| O                            | -2.67576300 | -1.59979100                                                                            | -1.19919600 |
| O                            | 0.98635700  | -1.15150500                                                                            | 1.32164800  |
| O                            | 1.92660100  | -2.07712900                                                                            | -0.49859700 |
| N                            | -0.57989200 | 3.08376900                                                                             | 0.58558500  |
| N                            | 4.04377100  | -0.54853200                                                                            | -0.32785700 |



|                |             |             |             |
|----------------|-------------|-------------|-------------|
| C              | 0.92984700  | 1.66178200  | -0.28081200 |
| C              | 2.22237100  | 1.05123500  | -0.72460400 |
| C              | -0.38476800 | 1.08395900  | -0.40416800 |
| C              | 2.77163000  | -0.00282500 | 0.25235200  |
| C              | -1.30068100 | 2.00569000  | 0.16152200  |
| C              | 0.75794500  | 2.87561800  | 0.32259400  |
| C              | -0.85462300 | -0.12722200 | -0.90069100 |
| C              | -2.67988000 | 1.73664500  | 0.24950100  |
| C              | -2.22414900 | -0.42674200 | -0.78664200 |
| C              | -3.12340300 | 0.52079500  | -0.20857200 |
| C              | 1.80889100  | -1.20763100 | 0.38001600  |
| H              | 2.97192000  | 1.83853700  | -0.84090600 |
| H              | 2.09178600  | 0.57477600  | -1.70291800 |
| H              | 2.99413300  | 0.43410900  | 1.22326100  |
| H              | 1.48989300  | 3.62293200  | 0.58802700  |
| H              | -0.95968000 | 3.90437100  | 1.03313500  |
| H              | -0.19155600 | -0.87101900 | -1.33193300 |
| H              | -3.36102700 | 2.45765500  | 0.68489800  |
| H              | -4.16964200 | 0.24802600  | -0.14329600 |
| H              | 3.76684100  | -1.26720900 | -1.01319400 |
| H              | 4.61824700  | -1.00768000 | 0.38160100  |
| H              | -2.22113000 | -2.38272700 | -0.52007500 |
| H              | 4.61640200  | 0.16566200  | -0.78195900 |
| O              | -1.66960100 | -2.99755500 | 0.41942000  |
| O              | -1.43832800 | -2.01677300 | 1.33399500  |
| H              | -0.46654200 | -1.74989600 | 1.23812300  |
| Frequencies -- | -2747.0477  | 48.9144     | 67.8879     |
| Red. masses -- | 1.2195      | 8.3409      | 7.3849      |

|            |    |            |       |       |        |       |       |        |       |       |
|------------|----|------------|-------|-------|--------|-------|-------|--------|-------|-------|
| Frc consts | -- | 5.4222     |       |       | 0.0118 |       |       | 0.0201 |       |       |
| IR Inten   | -- | 90199.9626 |       |       | 5.3639 |       |       | 8.2400 |       |       |
| Atom       | AN | X          | Y     | Z     | X      | Y     | Z     | X      | Y     | Z     |
| 1          | 8  | 0.00       | 0.05  | -0.00 | 0.16   | -0.10 | -0.11 | 0.04   | 0.00  | -0.08 |
| 2          | 8  | 0.01       | 0.00  | -0.00 | 0.01   | 0.02  | -0.02 | -0.11  | 0.32  | 0.10  |
| 3          | 8  | 0.00       | -0.00 | -0.00 | -0.07  | 0.03  | -0.08 | -0.13  | -0.05 | 0.28  |
| 4          | 7  | -0.01      | -0.01 | -0.00 | -0.04  | -0.12 | 0.16  | 0.05   | -0.07 | 0.10  |
| 5          | 7  | -0.00      | 0.00  | -0.00 | -0.02  | -0.04 | -0.12 | -0.10  | -0.11 | -0.09 |
| 6          | 6  | 0.01       | 0.00  | 0.00  | 0.01   | 0.01  | 0.05  | 0.01   | 0.02  | -0.10 |
| 7          | 6  | 0.00       | -0.00 | -0.00 | 0.03   | 0.05  | 0.02  | -0.01  | -0.01 | -0.12 |
| 8          | 6  | -0.00      | -0.01 | -0.01 | 0.03   | -0.01 | -0.04 | 0.01   | 0.02  | -0.07 |
| 9          | 6  | 0.00       | -0.00 | -0.00 | 0.02   | -0.01 | -0.05 | -0.02  | 0.03  | -0.07 |
| 10         | 6  | 0.01       | 0.01  | 0.00  | -0.01  | -0.09 | 0.04  | 0.04   | -0.04 | 0.06  |
| 11         | 6  | 0.01       | -0.01 | -0.00 | -0.03  | -0.06 | 0.17  | 0.04   | -0.03 | 0.01  |
| 12         | 6  | 0.03       | 0.01  | 0.00  | 0.07   | 0.01  | -0.12 | 0.02   | 0.04  | -0.12 |
| 13         | 6  | -0.01      | -0.01 | -0.00 | 0.00   | -0.14 | -0.01 | 0.05   | -0.09 | 0.14  |
| 14         | 6  | -0.03      | -0.05 | -0.01 | 0.09   | -0.06 | -0.13 | 0.03   | -0.01 | -0.04 |
| 15         | 6  | -0.01      | 0.02  | 0.01  | 0.05   | -0.12 | -0.10 | 0.05   | -0.07 | 0.09  |
| 16         | 6  | -0.00      | 0.00  | 0.01  | -0.02  | 0.01  | -0.05 | -0.09  | 0.11  | 0.13  |
| 17         | 1  | -0.01      | 0.00  | -0.00 | 0.02   | 0.07  | 0.09  | 0.01   | -0.03 | -0.18 |
| 18         | 1  | -0.00      | 0.00  | 0.00  | 0.04   | 0.12  | -0.01 | -0.05  | -0.06 | -0.09 |
| 19         | 1  | 0.00       | -0.00 | -0.00 | 0.07   | -0.06 | -0.04 | 0.08   | 0.11  | -0.12 |
| 20         | 1  | -0.00      | -0.00 | 0.00  | -0.05  | -0.07 | 0.27  | 0.04   | -0.05 | 0.05  |
| 21         | 1  | -0.01      | 0.00  | 0.00  | -0.06  | -0.17 | 0.24  | 0.06   | -0.11 | 0.19  |
| 22         | 1  | 0.00       | -0.00 | 0.00  | 0.10   | 0.05  | -0.15 | 0.01   | 0.08  | -0.20 |
| 23         | 1  | -0.00      | -0.00 | -0.00 | -0.03  | -0.19 | 0.04  | 0.06   | -0.14 | 0.25  |
| 24         | 1  | 0.00       | 0.00  | -0.00 | 0.06   | -0.16 | -0.12 | 0.06   | -0.11 | 0.15  |
| 25         | 1  | -0.00      | -0.00 | 0.00  | -0.07  | -0.01 | -0.12 | -0.19  | -0.19 | 0.03  |

|                                              |   |                             |             |                |                                                                                        |       |       |       |       |       |
|----------------------------------------------|---|-----------------------------|-------------|----------------|----------------------------------------------------------------------------------------|-------|-------|-------|-------|-------|
| 26                                           | 1 | -0.00                       | 0.00        | 0.00           | -0.00                                                                                  | -0.07 | -0.15 | -0.07 | -0.06 | -0.08 |
| 27                                           | 1 | 0.46                        | -0.54       | 0.68           | -0.00                                                                                  | -0.01 | 0.10  | 0.09  | -0.01 | -0.11 |
| 28                                           | 1 | 0.00                        | -0.00       | -0.00          | -0.02                                                                                  | -0.04 | -0.12 | -0.09 | -0.21 | -0.23 |
| 29                                           | 8 | -0.02                       | -0.02       | -0.06          | -0.13                                                                                  | 0.15  | 0.29  | 0.13  | -0.01 | -0.14 |
| 30                                           | 8 | 0.01                        | 0.04        | 0.03           | -0.10                                                                                  | 0.36  | 0.05  | 0.01  | -0.05 | -0.08 |
| 31                                           | 1 | -0.15                       | -0.06       | 0.01           | -0.06                                                                                  | 0.22  | 0.05  | -0.02 | 0.08  | -0.02 |
| Zero-point correction=                       |   | 0.239051 (Hartree/Particle) |             |                |                                                                                        |       |       |       |       |       |
| Thermal correction to Energy=                |   | 0.254961                    |             |                |                                                                                        |       |       |       |       |       |
| Thermal correction to Enthalpy=              |   | 0.255905                    |             |                |                                                                                        |       |       |       |       |       |
| Thermal correction to Gibbs Free Energy=     |   | 0.195357                    |             |                |                                                                                        |       |       |       |       |       |
| Sum of electronic and zero-point Energies=   |   | -912.188856                 |             |                |                                                                                        |       |       |       |       |       |
| Sum of electronic and thermal Energies=      |   | -912.172945                 |             |                |                                                                                        |       |       |       |       |       |
| Sum of electronic and thermal Enthalpies=    |   | -912.172001                 |             |                |                                                                                        |       |       |       |       |       |
| Sum of electronic and thermal Free Energies= |   | -912.232549                 |             |                |                                                                                        |       |       |       |       |       |
|                                              |   | E (Thermal)                 |             | CV             | S                                                                                      |       |       |       |       |       |
|                                              |   | KCal/Mol                    |             | Cal/Mol-Kelvin | Cal/Mol-Kelvin                                                                         |       |       |       |       |       |
| Total                                        |   | 159.991                     |             | 61.385         | 127.434                                                                                |       |       |       |       |       |
| Electronic                                   |   | 0.000                       |             | 0.000          | 1.377                                                                                  |       |       |       |       |       |
| Translational                                |   | 0.889                       |             | 2.981          | 42.486                                                                                 |       |       |       |       |       |
| Rotational                                   |   | 0.889                       |             | 2.981          | 32.989                                                                                 |       |       |       |       |       |
| Vibrational                                  |   | 158.213                     |             | 55.423         | 50.582                                                                                 |       |       |       |       |       |
| HF=-912.4279066                              |   |                             |             |                |                                                                                        |       |       |       |       |       |
| <b>Inter2-O1-H27-HAT-Water</b>               |   |                             |             |                | <b>C<sub>11</sub>H<sub>12</sub>N<sub>2</sub>O<sub>3</sub> + HOO<sup>•</sup>- Water</b> |       |       |       |       |       |
| 0 2                                          |   |                             |             |                |                                                                                        |       |       |       |       |       |
| O                                            |   | -2.72835300                 | -1.64554200 | -1.14091800    |                                                                                        |       |       |       |       |       |
| O                                            |   | 1.14038100                  | -1.09813500 | 1.30572400     |                                                                                        |       |       |       |       |       |
| O                                            |   | 2.16103600                  | -1.89215100 | -0.53612200    |                                                                                        |       |       |       |       |       |

|   |             |             |             |
|---|-------------|-------------|-------------|
| N | -0.84006400 | 3.06858600  | 0.63357300  |
| N | 4.07340800  | -0.13443300 | -0.39540000 |
| C | 0.74977400  | 1.74174500  | -0.24287500 |
| C | 2.07247600  | 1.24536400  | -0.73694700 |
| C | -0.53403600 | 1.07746600  | -0.34397100 |
| C | 2.76216100  | 0.26014000  | 0.21923500  |
| C | -1.49756200 | 1.96174700  | 0.22148400  |
| C | 0.51163700  | 2.94263500  | 0.35343300  |
| C | -0.93999000 | -0.14969800 | -0.82595700 |
| C | -2.87969600 | 1.64855500  | 0.29312500  |
| C | -2.33501700 | -0.51576300 | -0.75086300 |
| C | -3.28055400 | 0.44257500  | -0.19051400 |
| C | 1.94625200  | -1.05006900 | 0.35574400  |
| H | 2.73420400  | 2.10245100  | -0.89056700 |
| H | 1.94393900  | 0.75081200  | -1.70616800 |
| H | 2.95534700  | 0.71624100  | 1.18756000  |
| H | 1.19475500  | 3.74078200  | 0.59923100  |
| H | -1.26470200 | 3.87223000  | 1.07382400  |
| H | -0.24443600 | -0.87081000 | -1.24491500 |
| H | -3.58148600 | 2.35306900  | 0.72329000  |
| H | -4.32011400 | 0.14017800  | -0.15950000 |
| H | 3.85844000  | -0.90428900 | -1.04871200 |
| H | 4.72644900  | -0.49575200 | 0.30228600  |
| H | -1.65726500 | -2.90938200 | -0.41518400 |
| H | 4.53452700  | 0.63015300  | -0.89143900 |
| O | -1.08398700 | -3.41758600 | 0.19173400  |
| O | -1.08138200 | -2.59552700 | 1.35598600  |
| H | -0.22730100 | -2.10140700 | 1.28048600  |

|      | Anion (Adibatic) - Water |             | [C <sub>11</sub> H <sub>12</sub> N <sub>2</sub> O <sub>3</sub> ] <sup>-</sup> - Water |
|------|--------------------------|-------------|---------------------------------------------------------------------------------------|
| -1 2 |                          |             |                                                                                       |
| O    | -2.83632600              | -2.66655400 | -0.52637800                                                                           |
| O    | 1.73828800               | -0.55580800 | 1.99605500                                                                            |
| O    | 2.46102800               | -2.01078500 | 0.43766100                                                                            |
| N    | -1.20215400              | 2.53507300  | 0.30911600                                                                            |
| N    | 3.91343500               | -0.21501500 | -0.73856800                                                                           |
| C    | 0.35383000               | 1.16237700  | -0.53541600                                                                           |
| C    | 1.63993900               | 0.63292000  | -1.09022000                                                                           |
| C    | -0.83973100              | 0.41630200  | -0.34327600                                                                           |
| C    | 2.68969100               | 0.29285600  | -0.02397800                                                                           |
| C    | -1.81171600              | 1.30646600  | 0.18200800                                                                            |
| C    | 0.11610000               | 2.46982900  | -0.13243700                                                                           |
| C    | -1.19718900              | -0.96035700 | -0.58493200                                                                           |
| C    | -3.13029800              | 0.91946200  | 0.47473800                                                                            |
| C    | -2.51371800              | -1.33465100 | -0.28739000                                                                           |
| C    | -3.46760900              | -0.46051800 | 0.21710100                                                                            |
| C    | 2.24499300               | -0.86793400 | 0.90980900                                                                            |
| H    | 2.08453500               | 1.36681300  | -1.77275000                                                                           |
| H    | 1.44293200               | -0.27465400 | -1.67279300                                                                           |
| H    | 2.96976500               | 1.17473200  | 0.54863300                                                                            |
| H    | 0.75617200               | 3.33739500  | -0.12396400                                                                           |
| H    | -1.65814700              | 3.37043200  | 0.63669500                                                                            |
| H    | -0.48294700              | -1.69557200 | -0.93511000                                                                           |
| H    | -3.85894500              | 1.61638600  | 0.86956900                                                                            |
| H    | -4.47147800              | -0.82370100 | 0.41650600                                                                            |
| H    | 3.73672500               | -1.22162300 | -0.88910100                                                                           |
| H    | 4.75727100               | -0.12902200 | -0.17019100                                                                           |

| H                        | -3.74487800 | -2.81321200                                                  | -0.24692100 |
|--------------------------|-------------|--------------------------------------------------------------|-------------|
| H                        | 4.08033600  | 0.25629100                                                   | -1.62916200 |
| Anion (Vertical) - Water |             | $[\text{C}_{11}\text{H}_{12}\text{N}_2\text{O}_3]^-$ - Water |             |
| -1                       | 2           |                                                              |             |
| O                        | -2.52942900 | -2.71600500                                                  | -0.54976600 |
| O                        | 1.40713000  | -0.80584000                                                  | 1.85196500  |
| O                        | 2.26249600  | -2.02739800                                                  | 0.16318900  |
| N                        | -1.30653400 | 2.56370900                                                   | 0.29984800  |
| N                        | 3.91453300  | -0.14337500                                                  | -0.52012300 |
| C                        | 0.38029000  | 1.29243600                                                   | -0.46834700 |
| C                        | 1.72427000  | 0.86090700                                                   | -0.96480400 |
| C                        | -0.78624000 | 0.46531700                                                   | -0.32311900 |
| C                        | 2.63715400  | 0.30198300                                                   | 0.13503400  |
| C                        | -1.82467100 | 1.29453700                                                   | 0.15781900  |
| C                        | 0.01097200  | 2.55436200                                                   | -0.08163400 |
| C                        | -1.03365400 | -0.89598400                                                  | -0.55948300 |
| C                        | -3.10554700 | 0.79738700                                                   | 0.40414000  |
| C                        | -2.30322700 | -1.38252300                                                  | -0.31549800 |
| C                        | -3.33360700 | -0.54589700                                                  | 0.16117000  |
| C                        | 2.03859800  | -0.97068800                                                  | 0.80101500  |
| H                        | 2.22948000  | 1.70866500                                                   | -1.43734600 |
| H                        | 1.60096800  | 0.08589700                                                   | -1.73008900 |
| H                        | 2.87593900  | 1.06191300                                                   | 0.87605300  |
| H                        | 0.59597300  | 3.46151900                                                   | -0.05654200 |
| H                        | -1.81523100 | 3.37585600                                                   | 0.61114500  |
| H                        | -0.25103100 | -1.56491500                                                  | -0.90116000 |
| H                        | -3.89921600 | 1.43626300                                                   | 0.77235200  |
| H                        | -4.31710600 | -0.96696000                                                  | 0.34134900  |

|                                  |             |                                                                                     |             |
|----------------------------------|-------------|-------------------------------------------------------------------------------------|-------------|
| H                                | 3.72164300  | -1.09792200                                                                         | -0.86515400 |
| H                                | 4.68532200  | -0.20554200                                                                         | 0.14678600  |
| H                                | -3.43949500 | -2.93636500                                                                         | -0.32813900 |
| H                                | 4.20915100  | 0.46217700                                                                          | -1.28818300 |
| <b>Cation (Vertical) - Water</b> |             | <b>[C<sub>11</sub>H<sub>12</sub>N<sub>2</sub>O<sub>3</sub>]<sup>+</sup> - Water</b> |             |
| 12                               |             |                                                                                     |             |
| O                                | -2.52942900 | -2.71600500                                                                         | -0.54976600 |
| O                                | 1.40713000  | -0.80584000                                                                         | 1.85196500  |
| O                                | 2.26249600  | -2.02739800                                                                         | 0.16318900  |
| N                                | -1.30653400 | 2.56370900                                                                          | 0.29984800  |
| N                                | 3.91453300  | -0.14337500                                                                         | -0.52012300 |
| C                                | 0.38029000  | 1.29243600                                                                          | -0.46834700 |
| C                                | 1.72427000  | 0.86090700                                                                          | -0.96480400 |
| C                                | -0.78624000 | 0.46531700                                                                          | -0.32311900 |
| C                                | 2.63715400  | 0.30198300                                                                          | 0.13503400  |
| C                                | -1.82467100 | 1.29453700                                                                          | 0.15781900  |
| C                                | 0.01097200  | 2.55436200                                                                          | -0.08163400 |
| C                                | -1.03365400 | -0.89598400                                                                         | -0.55948300 |
| C                                | -3.10554700 | 0.79738700                                                                          | 0.40414000  |
| C                                | -2.30322700 | -1.38252300                                                                         | -0.31549800 |
| C                                | -3.33360700 | -0.54589700                                                                         | 0.16117000  |
| C                                | 2.03859800  | -0.97068800                                                                         | 0.80101500  |
| H                                | 2.22948000  | 1.70866500                                                                          | -1.43734600 |
| H                                | 1.60096800  | 0.08589700                                                                          | -1.73008900 |
| H                                | 2.87593900  | 1.06191300                                                                          | 0.87605300  |
| H                                | 0.59597300  | 3.46151900                                                                          | -0.05654200 |
| H                                | -1.81523100 | 3.37585600                                                                          | 0.61114500  |
| H                                | -0.25103100 | -1.56491500                                                                         | -0.90116000 |

|   |             |             |             |
|---|-------------|-------------|-------------|
| H | -3.89921600 | 1.43626300  | 0.77235200  |
| H | -4.31710600 | -0.96696000 | 0.34134900  |
| H | 3.72164300  | -1.09792200 | -0.86515400 |
| H | 4.68532200  | -0.20554200 | 0.14678600  |
| H | -3.43949500 | -2.93636500 | -0.32813900 |
| H | 4.20915100  | 0.46217700  | -1.28818300 |

**Table S6.** Optimized structure forms of HOO<sup>•</sup> in gas phase and water using M06-2X/6-311++g(d,p)

| <b>Radical HOO<sup>•</sup> - Gas</b>         |             |             |             | <b>[HOO]<sup>•</sup> - Gas</b> |  |  |  |
|----------------------------------------------|-------------|-------------|-------------|--------------------------------|--|--|--|
| 0 2                                          |             |             |             |                                |  |  |  |
| O                                            | 0.05493500  | -0.59902000 | 0.00000000  |                                |  |  |  |
| H                                            | -0.87895400 | -0.87292300 | 0.00000000  |                                |  |  |  |
| O                                            | 0.05493500  | 0.70813500  | 0.00000000  |                                |  |  |  |
| <b>HOOH - Gas</b>                            |             |             |             | <b>HOOH - Gas</b>              |  |  |  |
| 0 1                                          |             |             |             |                                |  |  |  |
| O                                            | 0.00000000  | 0.71202700  | -0.05308300 |                                |  |  |  |
| H                                            | 0.81565400  | 0.90168500  | 0.42466700  |                                |  |  |  |
| O                                            | 0.00000000  | -0.71202700 | -0.05308300 |                                |  |  |  |
| H                                            | -0.81565400 | -0.90168500 | 0.42466700  |                                |  |  |  |
| <b>Anion vertical HOO<sup>-</sup> - Gas</b>  |             |             |             | <b>[HOO]<sup>-</sup> - Gas</b> |  |  |  |
| -1 1                                         |             |             |             |                                |  |  |  |
| O                                            | 0.05493500  | -0.59902000 | 0.00000000  |                                |  |  |  |
| H                                            | -0.87895400 | -0.87292300 | 0.00000000  |                                |  |  |  |
| O                                            | 0.05493500  | 0.70813500  | 0.00000000  |                                |  |  |  |
| <b>Anion adiabatic HOO<sup>-</sup> - Gas</b> |             |             |             | <b>[HOO]<sup>-</sup> - Gas</b> |  |  |  |
| -1 1                                         |             |             |             |                                |  |  |  |
| O                                            | 0.05548700  | -0.68745900 | 0.00000000  |                                |  |  |  |



|                                                |             |                                  |             |
|------------------------------------------------|-------------|----------------------------------|-------------|
| H                                              | -0.88778700 | -0.86327100                      | 0.00000000  |
| O                                              | 0.05548700  | 0.79536800                       | 0.00000000  |
| <b>Anion vertical HOO<sup>-</sup> - Water</b>  |             | <b>[HOO]<sup>-</sup> - Water</b> |             |
| -1 1                                           |             |                                  |             |
| O                                              | 0.05490700  | -0.59691700                      | 0.00000000  |
| H                                              | -0.87852000 | -0.88050600                      | 0.00000000  |
| O                                              | 0.05490700  | 0.70698000                       | 0.00000000  |
| <b>Anion adiabatic HOO<sup>-</sup> - Water</b> |             | <b>[HOO]<sup>-</sup> - Water</b> |             |
| -1 1                                           |             |                                  |             |
| O                                              | 0.05512900  | -0.67541500                      | 0.00000000  |
| H                                              | -0.88206200 | -0.89722400                      | 0.00000000  |
| O                                              | 0.05512900  | 0.78756800                       | 0.00000000  |
| <b>Radical HOO<sup>•</sup> - Water</b>         |             | <b>[HOO]<sup>•</sup> - Water</b> |             |
| 0 2                                            |             |                                  |             |
| O                                              | 0.05496000  | -0.59539000                      | 0.00000000  |
| H                                              | -0.87935400 | -0.88486300                      | 0.00000000  |
| O                                              | 0.05496000  | 0.70599800                       | 0.00000000  |
| <b>HOOH - Water</b>                            |             | <b>HOOH - Water</b>              |             |
| 0 1                                            |             |                                  |             |
| O                                              | 0.00000000  | 0.70963200                       | -0.06657900 |
| H                                              | 0.72945600  | 0.92579700                       | 0.53263500  |
| O                                              | 0.00000000  | -0.70963200                      | -0.06657900 |
| H                                              | -0.72945600 | -0.92579700                      | 0.53263500  |

**Table S7** SOMO at transition states of LP and HLP from N-H and O-H bonds

For the N3-H20 and O1-H20 transfers, the SOMO at the TS is characterized by  $2p-\pi$  orbitals that are nearly orthogonal to the N3-donor $\cdots$ H $\cdots$ O-acceptor axis and O1-donor $\cdots$ H $\cdots$ O-acceptor axis (as can be seen in Fig. S2a and Fig. S2b). Based on Mayer's framework, this suggests a PCET mechanism. Here, the proton is transferred between lone-pair orbitals on nitrogen and oxygen in  $\sigma$  symmetry, while an electron is simultaneously transferred from a doubly occupied  $2p-\pi$  orbital on the nitrogen (LP) or oxygen (HLP) to the singly occupied  $2p-\pi$  orbital on the oxygen of the HOO $\cdot$  radical. In contrast, Fig. S2c also illustrates the SOMO corresponding to H transfer from the N4 atom in HLP. At this TS, the SOMO exhibits a node at the migrating hydrogen atom and is predominantly localized along the N4-donor $\cdots$ H $\cdots$ acceptor vector. This SOMO structure aligns with a HAT transition state, distinguishing it mechanistically from PCET. However, further investigations are required to provide a more precise understanding of the mechanisms underlying HAT and PCET.

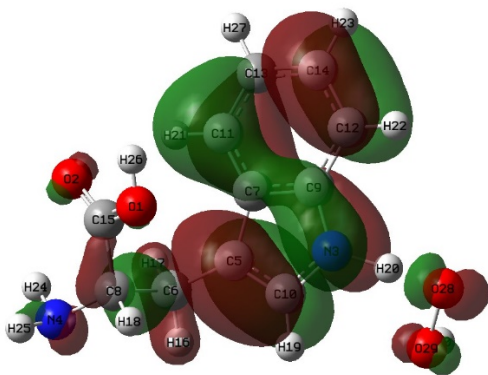

(a) SOMO of N3-H20-LP (PCET)

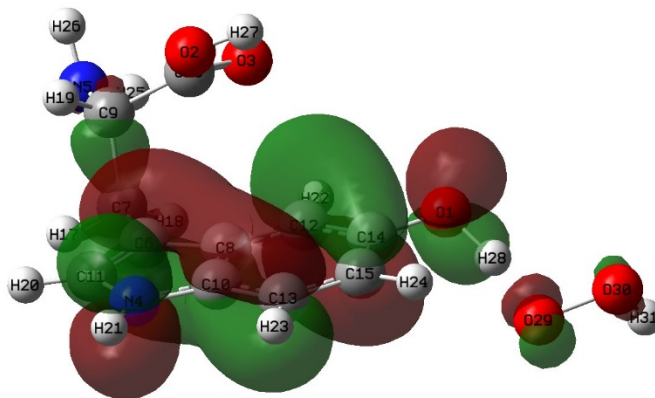

(b) SOMO of O1-H27-HLP (PCET)

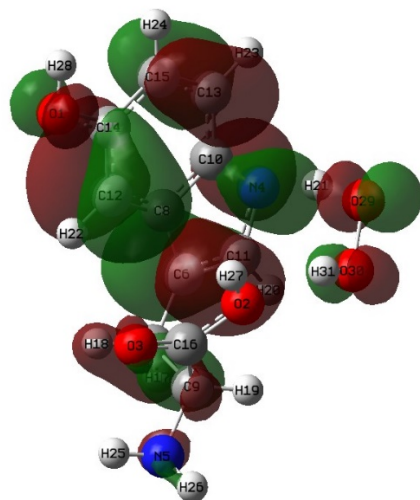

(c) SOMO of N4-H21-LP (HAT)

**Fig. S2.** SOMO of TSs from N-H and O-H bonds in LP and HLP molecules.
